# Supplementary material for: Whole-genome sequencing of 1,171 elderly admixed individuals from the largest Latin American metropolis (São Paulo, Brazil)
Source: Research Square preprint supplement (doi:10.21203/rs.3.rs-85969/v1), 2020-10-07
Supplement: Supplementary file 1 [file b83264355072daed286356ac.xlsx]

## Sheet: Supp Table 3
Supplementary Table 3. List of tools and versions applied in the bioinformatics pipeline
Step	Tool	Version/Package/Detail	Reference
1) Primary bioinformatics pipeline
Alignment, sorting, marking and removing PCR duplicates	ISIS Isaac Aligner	v. 2.5.26.13; aligner v. 1.14.02.06	Raczy, et al., 2013; Telenti, et al., 2016
Human genome reference		GRCh38/hg38 build
Generate GVCF, combine GVCFs and Variant calling	GATK release 3.7		Van der Auwera, et al., 2013
Split of multiallelic variants	In-house script
Left alignment	BCFtools	2020-06-01
2) Quality control
Variant Quality Score Recalibration (VQSR)	GATK release 3.7
Depth of coverage per sample	GATK release 3.7	GATK-DepthOfCoverage (mapping quality >=10)
Depth of coverage and allele balance for genotype and variant quality control	CEGH-Filter	v.1.2	Current paper and Naslavsky, et al., 2017
Kinship	KING	v.1.4	Manichaikul, et al., 2010
Relatedness	PC-Relate	GENESIS R/Bioconductor package	Gogarten, et al., 2019
Detection of contamination	verifyBAMID		Zhang, et al., 2020
Sex confirmation	In-house script for X and Y read counts
3) Ancestry analyses
Global ancestry inference	ADMIXTURE	v.1.3.0	Alexander, et al., 2009
Parental populations			Auton et al., 2015; Borda et al., 2020
Principal Component analyses	PLINK	v.1.9	Chang, et al., 2015
	SNPRelate		Zheng, et al., 2012
4) Annotation (Genome-wide)	ANNOVAR		Wang, et al., 2010
ANNOVAR Filter-based datasets	gnomAD	gnomad_exome v2.1.1, gnomad_genome v2.1.1
	1KGP3	1000g2015aug_all
	dbSNP	avsnp150
ANNOVAR gene-based annotation		RefSeq
Loss of Function (VEP)	LOFTEE	v0.3-beta	Karckzevski, et al., 2020. https://github.com/konradjk/loftee
pLI		gnomad.v2.1.1	https://genome.ucsc.edu/cgi-bin/hgTrackUi?db=hg19&c=chrX&g=gnomadPLI
5) Clinical annotations	ClinVar	Clinvar_20200210	https://ftp.ncbi.nlm.nih.gov/pub/clinvar/vcf_GRCh38/archive_2.0/2020/
	OMIM	OMIM_2019-12-10, OMIM Disease list	https://omim.org/downloads/
	ClinGen		https://clinicalgenome.org/
	PanelApp		https://panelapp.genomicsengland.co.uk/
6) Mobile Element Insertions (MEIs)	MELT	MELT-SPLIT, MELT-Deletion v.2.1.4	Gardner, et al., 2017. https://melt.igs.umaryland.edu/manual.php
	Database of Genomic Variants (DGV)		MacDonald, et al., 2014. http://dgv.tcag.ca/dgv/app/home
	GENCODE	v.32	https://www.gencodegenes.org/human/release_32.html
7) HLA variants and haplotypes	hla-mapper	v.4	Castelli, et al., 2018. www.castelli-lab.net/apps/hla-mapper
	GATK HaplotypeCaller	v.4.1.7
	VCFx	vcfx checkpl, checkad, and evidence v1.2b	Souza, et al., 2020. www.castelli-lab.net/apps/vcfx
	dbSNP	avsnp151
	GATK ReadBackedPhasing
	IPD-IMGT/HLA Database	v.3.4.0	Robinson, et al., 2020
8) HLA imputation	1KGP3	version 27022019	Lowy-Gallego, et al., 2019
	HIBAG	v1.4	Zheng, et al., 2020
Set of SNPs tested	Axiom Human Origins array		http://www.affymetrix.com/Auth/analysis/downloads/na35/genotyping/Axiom_GW_HuOrigin.na35.bed.zip
Target cohort			Nunes, et al., 2016
9) Non-reference sequences and assembly	Megahit assembler		Li, et al., 2015
	minimap2		Li, et al., 2018
	NCBI nr-database		Pruitt, et al., 2007
	bowtie2		Langmead, et al., 2012
Datasets for chromosome mapping	10X Chromium linked-reads		Marks, et al., 2019
	HGDP		Bergström, et al., 2020
	HGSVC		Chaisson, et al., 2019
10) Whole-genome imputation	SHAPEIT2		Delaneau, et al., 2011
	extractPIRs		Delaneau, et al., 2013
Baseline reference panel	1KGP3	version 27022019	Lowy-Gallego, et al., 2019
	IMPUTE2		Howie, et al., 2009
Set of SNPs tested	Illumina Omni 2.5M array		ftp://webdata2:webdata2@ussd-ftp.illumina.com/downloads/productfiles/humanomni25/v1-2/SupportFiles/HumanOmni2-5-8-v1-2-A.bed
Target cohorts		Salvador, Pelotas and Bambui	Kehdy, et al., 2015
	CrossMap		Zhao, et al., 2014
11) GWAS	plink2	v2	Chang, et al., 2015. www.cog-genomics.org/plink/2.0/)
	PCrelate		Conomos, et al., 2016
Set of SNPs tested	Illumina Omni 2.5M array		ftp://webdata2:webdata2@ussd-ftp.illumina.com/downloads/productfiles/humanomni25/v1-2/SupportFiles/HumanOmni2-5-8-v1-2-A.bed
	R	qqman	Turner, et al., 2014
	Haploview		Barrett, et al., 2004

## Sheet: Supp Table 6
Supplementary Table 6. OMIM Disease genes
Approved_Symbol	Gene_Name	MIM_number	Phenotypes
A2M	Alpha-2-macroglobulin	103950	Alpha-2-macroglobulin deficiency, 614036 (1), Autosomal dominant; {Alzheimer disease, susceptibility to}, 104300 (3), Autosomal dominant
A2ML1	Alpha-2-macroglobulin-like 1	610627	{Otitis media, susceptibility to}, 166760 (3), Autosomal dominant
A4GALT	Alpha 1,4-galactosyltransferase	607922	[Blood group, P1Pk system, p phenotype], 111400 (3); NOR polyagglutination syndrome, 111400 (3); [Blood group, P1Pk system, P(2) phenotype], 111400 (3)
AAAS	Aladin	605378	Achalasia-addisonianism-alacrimia syndrome, 231550 (3), Autosomal recessive
AAGAB	Alpha- and gamma-adaptin-binding protein	614888	Keratoderma, palmoplantar, punctate type IA, 148600 (3), Autosomal dominant
AARS1	Alanyl-tRNA synthetase 1	601065	Epileptic encephalopathy, early infantile, 29, 616339 (3), Autosomal recessive; Charcot-Marie-Tooth disease, axonal, type 2N, 613287 (3), Autosomal dominant
AARS2	Alanyl-tRNA synthetase 2	612035	Combined oxidative phosphorylation deficiency 8, 614096 (3), Autosomal recessive; Leukoencephalopathy, progressive, with ovarian failure, 615889 (3), Autosomal recessive
AASS	Alpha-aminoadipic semialdehyde synthase	605113	Saccharopinuria, 268700 (1), Autosomal recessive; Hyperlysinemia, 238700 (3), Autosomal recessive
ABAT	4-aminobutyrate aminotransferase	137150	GABA-transaminase deficiency, 613163 (3), Autosomal recessive
ABCA1	ATP-binding cassette 1	600046	HDL deficiency, familial, 1, 604091 (3); Tangier disease, 205400 (3), Autosomal recessive
ABCA12	ATP-binding cassette, subfamily A, member 12	607800	Ichthyosis, congenital, autosomal recessive 4B (harlequin), 242500 (3), Autosomal recessive; Ichthyosis, congenital, autosomal recessive 4A, 601277 (3), Autosomal recessive
ABCA3	ATP-binding cassette-3	601615	Surfactant metabolism dysfunction, pulmonary, 3, 610921 (3), Autosomal recessive
ABCA4	ATP-binding transporter, retina-specific	601691	Retinal dystrophy, early-onset severe, 248200 (3), Autosomal recessive; Stargardt disease 1, 248200 (3), Autosomal recessive; Fundus flavimaculatus, 248200 (3), Autosomal recessive; {Macular degeneration, age-related, 2}, 153800 (3), Autosomal dominant; Cone-rod dystrophy 3, 604116 (3); Retinitis pigmentosa 19, 601718 (3), Autosomal recessive
ABCA5	ATP-binding cassette, subfamily A, member 5	612503	?Hypertrichosis, congenital generalized, with gingival hyperplasia, 135400 (3), Autosomal recessive
ABCA7	ATP-binding cassette, subfamily A, member 7	605414	{Alzheimer disease 9, susceptibility to}, 608907 (3), Autosomal dominant
ABCB1	ATP-binding cassette, subfamily B, member 1 (P-glycoprotein-1/multiple drug resistance-1)	171050	{Inflammatory bowel disease 13}, 612244 (3); {Colchicine resistance}, 120080 (3)
ABCB11	ATP-binding cassette, subfamily B, member 11 (bile salt export pump)	603201	Cholestasis, progressive familial intrahepatic 2, 601847 (3), Autosomal recessive; Cholestasis, benign recurrent intrahepatic, 2, 605479 (3), Autosomal recessive
ABCB4	ATP-binding cassette, subfamily B, member 4 (P-glycoprotein-3/multiple drug resistance-3)	171060	Gallbladder disease 1, 600803 (3), Autosomal recessive, Autosomal dominant; Cholestasis, intrahepatic, of pregnancy, 3, 614972 (3), Autosomal recessive, Autosomal dominant; Cholestasis, progressive familial intrahepatic 3, 602347 (3), Autosomal recessive
ABCB6	ATP-binding cassette, subfamily B, member 6	605452	Dyschromatosis universalis hereditaria 3, 615402 (3), Autosomal dominant; Microphthalmia, isolated, with coloboma 7, 614497 (3), Autosomal dominant; [Blood group, Langereis system], 111600 (3); Pseudohyperkalemia, familial, 2, due to red cell leak, 609153 (3), Autosomal dominant
ABCB7	ATP-binding cassette-7	300135	Anemia, sideroblastic, with ataxia, 301310 (3), X-linked recessive
ABCC11	ATP-binding cassette, subfamily C, member 11	607040	[Colostrum secretion, variation in], 117800 (3), Autosomal dominant; [Earwax, wet/dry], 117800 (3), Autosomal dominant; [Axillary odor, variation in], 117800 (3), Autosomal dominant
ABCC2	ATP-binding cassette, subfamily C, member 2 (canalicular multispecific organic anion transporter)	601107	Dubin-Johnson syndrome, 237500 (3), Autosomal recessive
ABCC6	ATP-binding cassette, subfamily C, member 6	603234	Pseudoxanthoma elasticum, 264800 (3), Autosomal recessive; Pseudoxanthoma elasticum, forme fruste, 177850 (3), Autosomal dominant; Arterial calcification, generalized, of infancy, 2, 614473 (3), Autosomal recessive
ABCC8	ATP-binding cassette, subfamily C, member 8 (sulfonylurea receptor)	600509	Diabetes mellitus, permanent neonatal, 606176 (3), Autosomal recessive, Autosomal dominant; Diabetes mellitus, noninsulin-dependent, 125853 (3), Autosomal dominant; Diabetes mellitus, transient neonatal 2, 610374 (3); Hyperinsulinemic hypoglycemia, familial, 1, 256450 (3), Autosomal recessive, Autosomal dominant; Hypoglycemia of infancy, leucine-sensitive, 240800 (3), Autosomal dominant
ABCC9	ATP-binding cassette, subfamily C, member 9 (sulfonylurea receptor 2)	601439	Hypertrichotic osteochondrodysplasia, 239850 (3), Autosomal dominant; Atrial fibrillation, familial, 12, 614050 (3), Autosomal dominant; Cardiomyopathy, dilated, 1O, 608569 (3)
ABCD1	ATP-binding cassette, subfamily D, member 1	300371	Adrenomyeloneuropathy, adult, 300100 (3), X-linked recessive; Adrenoleukodystrophy, 300100 (3), X-linked recessive
ABCD3	ATP-binding cassette, subfamily D, member 3 (peroxisomal membrane protein 1, 70kD)	170995	?Bile acid synthesis defect, congenital, 5, 616278 (3), Autosomal recessive
ABCD4	ATP-binding cassette, subfamily D, member 4 (peroxisomal membrane protein 1-like)	603214	Methylmalonic aciduria and homocystinuria, cblJ type, 614857 (3), Autosomal recessive
ABCG2	ATP-binding cassette, subfamily G, member 2	603756	[Junior blood group system], 614490 (3); [Uric acid concentration, serum, QTL1], 138900 (3), ?Autosomal dominant
ABCG5	ATP-binding cassette, subfamily G, member 5	605459	Sitosterolemia 2, 618666 (3)
ABCG8	ATP-binding cassette, subfamily G, member 8	605460	{Gallbladder disease 4}, 611465 (3); Sitosterolemia 1, 210250 (3), Autosomal recessive
ABHD12	Abhydrolase domain-containing protein 12	613599	Polyneuropathy, hearing loss, ataxia, retinitis pigmentosa, and cataract, 612674 (3), Autosomal recessive
ABHD5	Abhydrolase domain containing 5	604780	Chanarin-Dorfman syndrome, 275630 (3), Autosomal recessive
ABL1	Abelson murine leukemia viral (v-abl) oncogene homolog 1	189980	Leukemia, Philadelphia chromosome-positive, resistant to imatinib, 608232 (3), Somatic mutation; Congenital heart defects and skeletal malformations syndrome, 617602 (3), Autosomal dominant
ABL2	Abelson murine leukemia viral (v-abl) oncogene homolog 2 (arg, Abelson-related gene)	164690	Leukemia, acute myeloid, with eosinophilia (1)
ABO	ABO glycosyltransferase	110300	[Blood group, ABO system], 616093 (3)
ACACA	Acetyl-Coenzyme A carboxylase, alpha	200350	Acetyl-CoA carboxylase deficiency, 613933 (1), Autosomal recessive
ACAD8	Acyl-CoA dehydrogenase family, member 8	604773	Isobutyryl-CoA dehydrogenase deficiency, 611283 (3)
ACAD9	Acyl-CoA dehydrogenase family, member 9	611103	Mitochondrial complex I deficiency, nuclear type 20, 611126 (3), Autosomal recessive
ACADM	Acyl-Coenzyme A dehydrogenase, C-4 to C-12 straight chain	607008	Acyl-CoA dehydrogenase, medium chain, deficiency of, 201450 (3), Autosomal recessive
ACADS	Acyl-Coenzyme A dehydrogenase, C-2 to C-3 short chain	606885	Acyl-CoA dehydrogenase, short-chain, deficiency of, 201470 (3), Autosomal recessive
ACADSB	Acyl-Coenzyme A dehydrogenase, short/branched chain	600301	2-methylbutyrylglycinuria, 610006 (3), Autosomal recessive
ACADVL	Acyl-Coenzyme A dehydrogenase, very long chain	609575	VLCAD deficiency, 201475 (3), Autosomal recessive
ACAN	Aggrecan (chondroitin sulfate proteoglycan-1, large aggregating proteoglycan, antigen identifies by monoclonal antibody A0122)	155760	Short stature and advanced bone age, with or without early-onset osteoarthritis and/or osteochondritis dissecans, 165800 (3), Autosomal dominant; Spondyloepimetaphyseal dysplasia, aggrecan type, 612813 (3), Autosomal recessive; ?Spondyloepiphyseal dysplasia, Kimberley type, 608361 (3), Autosomal dominant
ACAT1	Acetyl-Coenzyme A acetyltransferase-1 (acetoacetyl Coenzyme A thiolase)	607809	Alpha-methylacetoacetic aciduria, 203750 (3), Autosomal recessive
ACAT2	Acetyl-Coenzyme A acetyltransferase 2 (acetoacetyl Coenzyme A thiolase)	100678	?ACAT2 deficiency, 614055 (1), Isolated cases
ACD	ACD shelterin complex subunit and telomerase recruitment factor	609377	?Dyskeratosis congenita, autosomal dominant 6, 616553 (3), Autosomal recessive, Autosomal dominant; ?Dyskeratosis congenita, autosomal recessive 7, 616553 (3), Autosomal recessive, Autosomal dominant
ACE	Angiotensin I converting enzyme (dipeptidyl carboxypeptidase-1)	106180	Renal tubular dysgenesis, 267430 (3), Autosomal recessive; {Myocardial infarction, susceptibility to} (3); {Microvascular complications of diabetes 3}, 612624 (3); [Angiotensin I-converting enzyme, benign serum increase] (3); {SARS, progression of} (3); {Stroke, hemorrhagic}, 614519 (3)
ACER3	Alkaline ceramidase 3	617036	?Leukodystrophy, progressive, early childhood-onset, 617762 (3), Autosomal recessive
ACHE	Acetylcholinesterase (YT blood group)	100740	[Blood group, Yt system], 112100 (3)
ACKR1	Atypical chemokine receptor 1 (Duffy antigen receptor for chemokines)	613665	{Malaria, vivax, protection against}, 611162 (3); [Blood group, Duffy system], 110700 (3), Autosomal recessive, Autosomal dominant; [White blood cell count QTL], 611862 (3), Autosomal recessive
ACO2	Aconitase, mitochondrial	100850	Infantile cerebellar-retinal degeneration, 614559 (3), Autosomal recessive; ?Optic atrophy 9, 616289 (3), Autosomal recessive
ACOX1	Acyl-Coenzyme A oxidase 1, palmitoyl	609751	Peroxisomal acyl-CoA oxidase deficiency, 264470 (3), Autosomal recessive
ACOX2	Acyl-Coenzyme A oxidase 2, branched chain	601641	Bile acid synthesis defect, congenital, 6, 617308 (3), Autosomal recessive
ACP2	Acid phosphatase 2, lysosomal	171650	?Lysosomal acid phosphatase deficiency, 200950 (1), Autosomal recessive
ACP4	Acid phosphatase 4	606362	Amelogenesis imperfecta, type IJ, 617297 (3), Autosomal recessive
ACP5	Acid phosphatase 5, tartrate resistant	171640	Spondyloenchondrodysplasia with immune dysregulation, 607944 (3), Autosomal recessive
ACR	Acrosin	102480	?Male infertility due to acrosin deficiency, 102480 (2)
ACSF3	Acyl-CoA synthetase family member 3	614245	Combined malonic and methylmalonic aciduria, 614265 (3)
ACSL4	Acyl-CoA synthetase long-chain family member 4	300157	Mental retardation, X-linked 63, 300387 (3), X-linked dominant
ACSL6	Acyl-CoA synthetase long-chain family member 6	604443	Myelodysplastic syndrome (3); Myelogenous leukemia, acute (3)
ACSM3	Acyl-CoA synthetase medium-chain family member 3	145505	{?Hypertension, essential} (1)
ACTA1	Actin, alpha-1, skeletal muscle	102610	Myopathy, actin, congenital, with cores, 161800 (3), Autosomal recessive, Autosomal dominant; Nemaline myopathy 3, autosomal dominant or recessive, 161800 (3), Autosomal recessive, Autosomal dominant; Myopathy, congenital, with fiber-type disproportion 1, 255310 (3), Autosomal recessive, Autosomal dominant; Myopathy, actin, congenital, with excess of thin myofilaments, 161800 (3), Autosomal reces…
ACTA2	Actin, alpha-2, smooth muscle, aorta	102620	Aortic aneurysm, familial thoracic 6, 611788 (3), Autosomal dominant; Multisystemic smooth muscle dysfunction syndrome, 613834 (3), Autosomal dominant; Moyamoya disease 5, 614042 (3)
ACTB	Actin, beta	102630	?Dystonia, juvenile-onset, 607371 (3), Autosomal dominant; Baraitser-Winter syndrome 1, 243310 (3), Autosomal dominant
ACTC1	Actin, alpha, cardiac muscle	102540	Left ventricular noncompaction 4, 613424 (3), Autosomal dominant; Atrial septal defect 5, 612794 (3), Autosomal dominant; Cardiomyopathy, dilated, 1R, 613424 (3), Autosomal dominant; Cardiomyopathy, hypertrophic, 11, 612098 (3), Autosomal dominant
ACTG1	Actin, gamma-1	102560	Baraitser-Winter syndrome 2, 614583 (3), Autosomal dominant; Deafness, autosomal dominant 20/26, 604717 (3), Autosomal dominant
ACTG2	Actin, gamma-2, smooth muscle, enteric	102545	Visceral myopathy, 155310 (3), Autosomal dominant
ACTL6B	Actin-like 6B	612458	Intellectual developmental disorder with severe speech and ambulation defects, 618470 (3), Autosomal dominant; Epileptic encephalopathy, early infantile, 76, 618468 (3)
ACTN1	Actinin, alpha-1	102575	Bleeding disorder, platelet-type, 15, 615193 (3), Autosomal dominant
ACTN2	Actinin, alpha-2	102573	Myopathy, distal, 6, adult onset, 618655 (3), Autosomal dominant; Cardiomyopathy, dilated, 1AA, with or without LVNC, 612158 (3), Autosomal dominant; Cardiomyopathy, hypertrophic, 23, with or without LVNC, 612158 (3), Autosomal dominant; Myopathy, congenital with structured cores and Z-line abnormalities, 618654 (3), Autosomal dominant
ACTN3	Actinin, alpha-3	102574	[Alpha-actinin-3 deficiency], 617749 (3); [Sprinting performance], 617749 (3)
ACTN4	Actinin, alpha-4	604638	Glomerulosclerosis, focal segmental, 1, 603278 (3), Autosomal dominant
ACVR1	Activin A receptor, type I	102576	Fibrodysplasia ossificans progressiva, 135100 (3), Autosomal dominant
ACVR1B	Activin A receptor, type IB	601300	Pancreatic cancer, somatic (3)
ACVR2B	Activin A receptor, type IIB	602730	Heterotaxy, visceral, 4, autosomal, 613751 (3)
ACVRL1	Activin A receptor, type II-like kinase 1	601284	Telangiectasia, hereditary hemorrhagic, type 2, 600376 (3), Autosomal dominant
ACY1	Aminoacylase-1	104620	Aminoacylase 1 deficiency, 609924 (3), Autosomal recessive
ADA	Adenosine deaminase	608958	Adenosine deaminase deficiency, partial, 102700 (3), Autosomal recessive, Somatic mosaicism; Severe combined immunodeficiency due to ADA deficiency, 102700 (3), Autosomal recessive, Somatic mosaicism
ADA2	Adenosine deaminase 2	607575	Vasculitis, autoinflammation, immunodeficiency, and hematologic defects syndrome, 615688 (3), Autosomal recessive; ?Sneddon syndrome, 182410 (3), Autosomal recessive
ADAM10	ADAM metallopeptidase domain 10	602192	{Alzheimer disease 18, susceptibility to}, 615590 (3); Reticulate acropigmentation of Kitamura, 615537 (3), Autosomal dominant
ADAM17	ADAM metallopeptidase domain 17	603639	?Inflammatory skin and bowel disease, neonatal, 1, 614328 (3), Autosomal recessive
ADAM22	ADAM metallopeptidase domain 22	603709	?Epileptic encephalopathy, early infantile, 61, 617933 (3), Autosomal recessive
ADAM9	ADAM metallopeptidase domain 9	602713	Cone-rod dystrophy 9, 612775 (3), Autosomal recessive
ADAMTS10	ADAM metallopeptidase domain with thrombospondin type 1 motif, 10	608990	Weill-Marchesani syndrome 1, recessive, 277600 (3), Autosomal recessive
ADAMTS13	ADAM metallopeptidase domain with thrombospondin type 1 motif, 13	604134	Thrombotic thrombocytopenic purpura, familial, 274150 (3), Autosomal recessive
ADAMTS17	ADAM metallopeptidase domain with thrombospondin type 1 motif, 17	607511	Weill-Marchesani 4 syndrome, recessive, 613195 (3), Autosomal recessive
ADAMTS18	ADAM metallopeptidase domain with thrombospondin type 1 motif, 18	607512	Microcornea, myopic chorioretinal atrophy, and telecanthus, 615458 (3), Autosomal recessive
ADAMTS2	ADAM metallopeptidase with thrombospondin type 1 motif, 2 (procollagen I N-proteinase)	604539	Ehlers-Danlos syndrome, dermatosparaxis type, 225410 (3), Autosomal recessive
ADAMTS3	ADAM metallopeptidase with thrombospondin type 1 motif, 3	605011	Hennekam lymphangiectasia-lymphedema syndrome 3, 618154 (3), Autosomal recessive
ADAMTSL2	ADAMTS-like protein 2	612277	Geleophysic dysplasia 1, 231050 (3), Autosomal recessive
ADAMTSL4	ADAMTS-like 4	610113	Ectopia lentis et pupillae, 225200 (3), Autosomal recessive; Ectopia lentis, isolated, autosomal recessive, 225100 (3), Autosomal recessive
ADAR	Adenosine deaminase, RNA-specific	146920	Dyschromatosis symmetrica hereditaria, 127400 (3), Autosomal dominant; Aicardi-Goutieres syndrome 6, 615010 (3), Autosomal recessive
ADAT3	Adenosine deaminase, tRNA-specific, 3	615302	Mental retardation, autosomal recessive 36, 615286 (3), Autosomal recessive
ADCY1	Adenylate cyclase-1, brain	103072	?Deafness, autosomal recessive 44, 610154 (3), Autosomal recessive
ADCY10	Adenylyl cyclase 10, soluble	605205	{Hypercalciuria, absorptive, susceptibility to}, 143870 (3), Autosomal dominant
ADCY3	Adenylate cyclase-3	600291	{Obesity, susceptibility to, BMIQ19}, 617885 (3), Autosomal recessive
ADCY5	Adenylate cyclase-5	600293	Dyskinesia, familial, with facial myokymia, 606703 (3), Autosomal dominant
ADCY6	Adenylate cyclase-6	600294	?Lethal congenital contracture syndrome 8, 616287 (3), Autosomal recessive
ADD1	Adducin-1, alpha	102680	{Hypertension, essential, salt-sensitive}, 145500 (3), Multifactorial
ADD3	Adducin-3, gamma	601568	Cerebral palsy, spastic quadriplegic, 3, 617008 (3), Autosomal recessive
ADGRE2	Adhesion G protein-coupled receptor E2	606100	Vibratory urticaria, 125630 (3), Autosomal dominant
ADGRG1	Adhesion G protein-coupled receptor G1	604110	Polymicrogyria, bilateral perisylvian, 615752 (3); Polymicrogyria, bilateral frontoparietal, 606854 (3), Autosomal recessive
ADGRG2	Adhesion G protein-coupled receptor G2	300572	Congenital bilateral absence of vas deferens, X-linked, 300985 (3), X-linked
ADGRG6	Adhesion G protein-coupled receptor G6	612243	Lethal congenital contracture syndrome 9, 616503 (3), Autosomal recessive
ADGRV1	Adhesion G protein-coupled receptor V1	602851	Usher syndrome, type 2C, 605472 (3), Autosomal recessive, Digenic dominant; ?Febrile seizures, familial, 4, 604352 (3), Autosomal dominant; Usher syndrome, type 2C, GPR98/PDZD7 digenic, 605472 (3), Autosomal recessive, Digenic dominant
ADH1B	Alcohol dehydrogenase IB (class I), beta polypeptide	103720	{Alcohol dependence, protection against}, 103780 (3), Multifactorial; {Aerodigestive tract cancer, squamous cell, alcohol-related, protection against}, 103780 (3), Multifactorial
ADH1C	Alcohol dehydrogenase IC (class I), gamma polypeptide	103730	{Parkinson disease, susceptibility to}, 168600 (3), Autosomal dominant, Multifactorial; {Alcohol dependence, protection against}, 103780 (3), Multifactorial
ADIPOQ	Adipocyte-, C1q-, and collagen domain-containing	605441	Adiponectin deficiency, 612556 (3)
ADK	Adenosine kinase	102750	Hypermethioninemia due to adenosine kinase deficiency, 614300 (3), Autosomal recessive
ADNP	Activity-dependent neuroprotector homeobox	611386	Helsmoortel-van der Aa syndrome, 615873 (3), Autosomal dominant
ADPRS	ADP-ribosylhydrolase-like 2	610624	Neurodegeneration, childhood-onset, stress-induced, with variable ataxia and seizures, 618170 (3), Autosomal recessive
ADRA2C	Adrenergic, alpha-2C-, receptor	104250	{Congestive heart failure and beta-blocker response, modifier of} (3)
ADRB1	Adrenergic, beta-1-, receptor	109630	[Resting heart rate], 607276 (3); [Short sleep, familial natural, 2], 618591 (3), Autosomal dominant
ADRB2	Adrenergic, beta-2-, receptor, surface	109690	{Asthma, nocturnal, susceptibility to}, 600807 (3), Autosomal dominant; {Obesity, susceptibility to}, 601665 (3), Autosomal recessive, Autosomal dominant, Multifactorial; Beta-2-adrenoreceptor agonist, reduced response to (3)
ADRB3	Adrenergic, beta-3-, receptor	109691	{Obesity, susceptibility to}, 601665 (3), Autosomal recessive, Autosomal dominant, Multifactorial
ADSL	Adenylosuccinate lyase	608222	Adenylosuccinase deficiency, 103050 (3), Autosomal recessive
ADSS1	Adenylosuccinate synthase-like 1	612498	Myopathy, distal, 5, 617030 (3), Autosomal recessive
AEBP1	AE-binding protein 1	602981	Ehlers-Danlos syndrome, classic-like, 2, 618000 (3), Autosomal recessive
AFF2	AF4/FMR2 family, member 2 (fragile site, X-linked, E)	300806	Mental retardation, X-linked, FRAXE type, 309548 (3), X-linked recessive
AFF4	AF4/FMR2 family, member 4	604417	CHOPS syndrome, 616368 (3), Autosomal dominant
AFG3L2	ATPase family gene 3-like 2	604581	Spastic ataxia 5, autosomal recessive, 614487 (3), Autosomal recessive; Spinocerebellar ataxia 28, 610246 (3), Autosomal dominant
AFP	Alpha-fetoprotein	104150	Alpha-fetoprotein deficiency, 615969 (3), Autosomal recessive; [Hereditary persistence of alpha-fetoprotein], 615970 (3), Autosomal dominant
AGA	Aspartylglucosaminidase	613228	Aspartylglucosaminuria, 208400 (3), Autosomal recessive
AGBL1	ATP/GTP-binding protein-like 1	615496	Corneal dystrophy, Fuchs endothelial, 8, 615523 (3), Autosomal dominant
AGBL5	AATP/GTP-binding protein-like 5	615900	Retinitis pigmentosa 75, 617023 (3), Autosomal recessive
AGK	Acylglycerol kinase	610345	Sengers syndrome, 212350 (3), Autosomal recessive; Cataract 38, autosomal recessive, 614691 (3), Autosomal recessive
AGL	Amylo-1,6-glucosidase, 4-alpha-glucanotransferase (glycogen debranching enzyme)	610860	Glycogen storage disease IIIb, 232400 (3), Autosomal recessive; Glycogen storage disease IIIa, 232400 (3), Autosomal recessive
AGPAT2	1-acylglycerol-3-phosphate O-acyltransferase 2 (lysophosphatidic acid acyltransferase-beta)	603100	Lipodystrophy, congenital generalized, type 1, 608594 (3), Autosomal recessive
AGPS	Alkylglycerone-phosphate synthase	603051	Rhizomelic chondrodysplasia punctata, type 3, 600121 (3), Autosomal recessive
AGRN	Agrin	103320	Myasthenic syndrome, congenital, 8, with pre- and postsynaptic defects, 615120 (3), Autosomal recessive
AGRP	Agouti-related neuropeptide	602311	{Obesity, late-onset}, 601665 (3), Autosomal recessive, Autosomal dominant, Multifactorial; {Leanness, inherited}, 601665 (3), Autosomal recessive, Autosomal dominant, Multifactorial
AGT	Angiotensinogen	106150	{Preeclampsia, susceptibility to} (3); Renal tubular dysgenesis, 267430 (3), Autosomal recessive; {Hypertension, essential, susceptibility to}, 145500 (3), Multifactorial
AGTPBP1	ATP/GTP-binding protein 1	606830	Neurodegeneration, childhood-onset, with cerebellar atrophy, 618276 (3), Autosomal recessive
AGTR1	Angiotensin receptor 1	106165	Renal tubular dysgenesis, 267430 (3), Autosomal recessive; {Hypertension, essential}, 145500 (3), Multifactorial
AGXT	Alanine-glyoxylate aminotransferase, liver-specific peroxisomal	604285	Hyperoxaluria, primary, type 1, 259900 (3), Autosomal recessive
AGXT2	Alanine-glyoxylate aminotransferase 2	612471	[Beta-aminoisobutyric acid, urinary excretion of], 210100 (3), Autosomal recessive
AHCY	S-adenosylhomocysteine hydrolase	180960	Hypermethioninemia with deficiency of S-adenosylhomocysteine hydrolase, 613752 (3), Autosomal recessive
AHDC1	AT-hook DNA-binding motif-containing protein 1	615790	Xia-Gibbs syndrome, 615829 (3), Autosomal dominant
AHI1	Abelson helper integration site 1	608894	Joubert syndrome 3, 608629 (3), Autosomal recessive
AHR	Aryl hydrocarbon receptor	600253	?Retinitis pigmentosa 85, 618345 (3), Autosomal recessive
AHSG	Alpha-2HS-glycoprotein	138680	?Alopecia-mental retardation syndrome 1, 203650 (3), Autosomal recessive
AICDA	Activation-induced cytidine deaminase	605257	Immunodeficiency with hyper-IgM, type 2, 605258 (3), Autosomal recessive
AIFM1	Apoptosis-inducing factor, mitochondrion-associated, 1	300169	Cowchock syndrome, 310490 (3), X-linked recessive; Spondyloepimetaphyseal dysplasia, X-linked, with hypomyelinating leukodystrophy, 300232 (3), X-linked recessive; Combined oxidative phosphorylation deficiency 6, 300816 (3), X-linked recessive; Deafness, X-linked 5, 300614 (3), X-linked recessive
AIMP1	ARS-interacting multifunctional protein 1	603605	Leukodystrophy, hypomyelinating, 3, 260600 (3), Autosomal recessive
AIMP2	Aminoacyl tRNA synthetase complex-interacting multifunctional protein 2	600859	Leukodystrophy, hypomyelinating, 17, 618006 (3), Autosomal recessive
AIP	Aryl hydrocarbon receptor-interacting protein	605555	Pituitary adenoma 1, multiple types, 102200 (3), Autosomal dominant, Somatic mutation; Pituitary adenoma predisposition, 102200 (3), Autosomal dominant, Somatic mutation
AIPL1	Arylhydrocarbon-interacting receptor protein-like 1	604392	Leber congenital amaurosis 4, 604393 (3), Autosomal recessive; Retinitis pigmentosa, juvenile, 604393 (3), Autosomal recessive; Cone-rod dystrophy, 604393 (3), Autosomal recessive
AIRE	Autoimmune regulator	607358	Autoimmune polyendocrinopathy syndrome , type I, with or without reversible metaphyseal dysplasia, 240300 (3), Autosomal recessive, Autosomal dominant
AK1	Adenylate kinase-1	103000	Hemolytic anemia due to adenylate kinase deficiency, 612631 (3), Autosomal recessive
AK2	Adenylate kinase-2, mitochondrial	103020	Reticular dysgenesis, 267500 (3), Autosomal recessive
AK7	Adenylate kinase 7	615364	?Spermatogenic failure 27, 617965 (3), Autosomal recessive
AKAP10	A-kinase anchor protein 10	604694	{Cardiac conduction defect, susceptibility to}, 115080 (3), Autosomal dominant
AKAP9	A-kinase anchor protein 9	604001	?Long QT syndrome 11, 611820 (3), Autosomal dominant
AKR1C2	Aldo-keto reductase family 1, member C2 (dihydrodiol dehydrogenase, type II)	600450	46XY sex reversal 8, 614279 (3), Autosomal recessive
AKR1C4	Aldo-keto reductase family 1, member C4 (chlordecone reductase)	600451	{46XY sex reversal 8, modifier of}, 614279 (3), Autosomal recessive
AKR1D1	Bile acid synthesis defect, congenital, 2	604741	Bile acid synthesis defect, congenital, 2, 235555 (3), Autosomal recessive
AKT1	AKT serine/threonine kinase 1	164730	Breast cancer, somatic, 114480 (3); Cowden syndrome 6, 615109 (3); Proteus syndrome, somatic, 176920 (3); Ovarian cancer, somatic, 167000 (3); Colorectal cancer, somatic, 114500 (3); {Schizophrenia, susceptibility to}, 181500 (2), Autosomal dominant
AKT2	AKT serine/threonine kinase 2	164731	Hypoinsulinemic hypoglycemia with hemihypertrophy, 240900 (3), Autosomal dominant; Diabetes mellitus, type II, 125853 (3), Autosomal dominant
AKT3	AKT serine/threonine kinase 3	611223	Megalencephaly-polymicrogyria-polydactyly-hydrocephalus syndrome 2, 615937 (3), Autosomal dominant
ALAD	Aminolevulinate, delta-, dehydratase	125270	Porphyria, acute hepatic, 612740 (3), Autosomal recessive; {Lead poisoning, susceptibility to}, 612740 (3), Autosomal recessive
ALAS2	Aminolevulinate, delta-, synthase-2	301300	Protoporphyria, erythropoietic, X-linked, 300752 (3), X-linked; Anemia, sideroblastic, 1, 300751 (3), X-linked recessive
ALB	Albumin	103600	[Dysalbuminemic hyperthyroxinemia], 615999 (3); Analbuminemia, 616000 (3)
ALDH18A1	Aldehyde dehydrogenase 18 family, member A1 (1-pyrroline-5-carboxylate synthetase)	138250	Cutis laxa, autosomal recessive, type IIIA, 219150 (3), Autosomal recessive; Cutis laxa, autosomal dominant 3, 616603 (3), Autosomal dominant; Spastic paraplegia 9B, autosomal recessive, 616586 (3), Autosomal recessive; Spastic paraplegia 9A, autosomal dominant, 601162 (3), Autosomal dominant
ALDH1A3	Aldehyde dehydrogenase 1 family, member A3	600463	Microphthalmia, isolated 8, 615113 (3), Autosomal recessive
ALDH2	Aldehyde dehydrogenase 2 family, mitochondrial	100650	Alcohol sensitivity, acute, 610251 (3), Autosomal dominant; {Esophageal cancer, alcohol-related, susceptibility to} (3); {Hangover, susceptibility to}, 610251 (3), Autosomal dominant; {Sublingual nitroglycerin, susceptibility to poor response to} (3)
ALDH3A2	Aldehyde dehydrogenase 3 family, member A2 (fatty aldehyde dehydrogenase)	609523	Sjogren-Larsson syndrome, 270200 (3), Autosomal recessive
ALDH4A1	Aldehyde dehydrogenase 4 family, member A1 (delta-1-pyrroline 5-carboxylate dehydrogenase)	606811	Hyperprolinemia, type II, 239510 (3), Autosomal recessive
ALDH5A1	Succinic semialdehyde dehydrogenase	610045	Succinic semialdehyde dehydrogenase deficiency, 271980 (3), Autosomal recessive
ALDH6A1	Aldehyde dehydrogenase 6 family, member A1 (methylmalonate semialdehyde dehydrogenase)	603178	Methylmalonate semialdehyde dehydrogenase deficiency, 614105 (3), Autosomal recessive
ALDH7A1	Aldehyde dehydrogenase 7 family, member A1 (antiquitin 1)	107323	Epilepsy, pyridoxine-dependent, 266100 (3), Autosomal recessive
ALDOA	Aldolase A, fructose-bisphosphatase	103850	Glycogen storage disease XII, 611881 (3), Autosomal recessive
ALDOB	Aldolase B, fructose-bisphosphatase	612724	Fructose intolerance, hereditary, 229600 (3), Autosomal recessive
ALG1	Alg1, yeast, homolog of (beta-1,4 mannosyltransferase)	605907	Congenital disorder of glycosylation, type Ik, 608540 (3), Autosomal recessive
ALG10B	Alg10, S. cerevisiae, homolog of, B	603313	{Long QT syndrome, acquired, reduced susceptibility to}, 613688 (3), Autosomal dominant
ALG11	Alg11, S. cerevisiae, homolog of	613666	Congenital disorder of glycosylation, type Ip, 613661 (3), Autosomal recessive
ALG12	Dolichyl-P-mannose:Man-7-GlcNAc-2-PP-dolichyl-alpha-6- mannosyltransferase	607144	Congenital disorder of glycosylation, type Ig, 607143 (3), Autosomal recessive
ALG13	Alg13, S. cerevisiae, homolog of	300776	Epileptic encephalopathy, early infantile, 36, 300884 (3), X-linked dominant; ?Congenital disorder of glycosylation, type Is, 300884 (3), X-linked dominant
ALG14	Alg14, S. cerevisiae, homolog of	612866	?Myasthenic syndrome, congenital, 15, without tubular aggregates, 616227 (3), Autosomal recessive
ALG2	Alg2, S. cerevisiae, homolog of	607905	Myasthenic syndrome, congenital, 14, with tubular aggregates, 616228 (3), Autosomal recessive; ?Congenital disorder of glycosylation, type Ii, 607906 (3), Autosomal recessive
ALG3	Alg3, S. cerevisiae, homolog of	608750	Congenital disorder of glycosylation, type Id, 601110 (3), Autosomal recessive
ALG6	ALG6 alpha-1,3-glucosyltransferase	604566	Congenital disorder of glycosylation, type Ic, 603147 (3), Autosomal recessive
ALG8	Alg8, S. cerevisiae, homolog of	608103	Congenital disorder of glycosylation, type Ih, 608104 (3), Autosomal recessive; Polycystic liver disease 3 with or without kidney cysts, 617874 (3), Autosomal dominant
ALG9	Alg9, yeast, homolog of	606941	Gillessen-Kaesbach-Nishimura syndrome, 263210 (3), Autosomal recessive; Congenital disorder of glycosylation, type Il, 608776 (3), Autosomal recessive
ALK	Anaplastic lymphoma kinase (Ki-1)	105590	{Neuroblastoma, susceptibility to, 3}, 613014 (3)
ALKBH8	AlkB homolog 8, tRNA methyltransferase	613306	Intellectual developmental disorder, autosomal recessive 71, 618504 (3), Autosomal recessive
ALMS1	ALMS1 centrosome and basal body associated protein	606844	Alstrom syndrome, 203800 (3), Autosomal recessive
ALOX12B	Archidonate 12-lipoxygenase, R type	603741	Ichthyosis, congenital, autosomal recessive 2, 242100 (3), Autosomal recessive
ALOX5	Arachidonate 5-lipoxygenase	152390	{Atherosclerosis, susceptibility to} (3); {Asthma, diminished response to antileukotriene treatment in}, 600807 (3), Autosomal dominant
ALOX5AP	Arachidonate 5-lipoxygenase-activating protein	603700	{Stroke, susceptibility to}, 601367 (3), Multifactorial
ALOXE3	Arachidonate lipoxygenase 3	607206	Ichthyosis, congenital, autosomal recessive 3, 606545 (3), Autosomal recessive
ALPK3	Alpha kinase 3	617608	Cardiomyopathy, familial hypertrophic 27, 618052 (3), Autosomal recessive
ALPL	Alkaline phosphatase, liver/bone/kidney	171760	Hypophosphatasia, adult, 146300 (3), Autosomal recessive, Autosomal dominant; Odontohypophosphatasia, 146300 (3), Autosomal recessive, Autosomal dominant; Hypophosphatasia, childhood, 241510 (3), Autosomal recessive; Hypophosphatasia, infantile, 241500 (3), Autosomal recessive
ALS2	Alsin	606352	Primary lateral sclerosis, juvenile, 606353 (3), Autosomal recessive; Amyotrophic lateral sclerosis 2, juvenile, 205100 (3), Autosomal recessive; Spastic paralysis, infantile onset ascending, 607225 (3), Autosomal recessive
ALX1	Aristaless-like homeobox 1 (cartilage homeoprotein 1)	601527	?Frontonasal dysplasia 3, 613456 (3)
ALX3	Aristaless-like homeobox 3	606014	Frontonasal dysplasia 1, 136760 (3), Autosomal recessive
ALX4	Aristaless-like 4, mouse, homolog of	605420	Frontonasal dysplasia 2, 613451 (3), Autosomal recessive; Parietal foramina 2, 609597 (3), Autosomal dominant; {Craniosynostosis 5, susceptibility to}, 615529 (3), Autosomal dominant
AMACR	Alpha-methylacyl-CoA racemase	604489	Bile acid synthesis defect, congenital, 4, 214950 (3), Autosomal recessive; Alpha-methylacyl-CoA racemase deficiency, 614307 (3), Autosomal recessive
AMBN	Ameloblastin	601259	Amelogenesis imperfecta, type IF, 616270 (3), Autosomal recessive
AMELX	Amelogenin	300391	Amelogenesis imperfecta, type 1E, 301200 (3), X-linked dominant
AMER1	APC membrane recruitment protein 1	300647	Osteopathia striata with cranial sclerosis, 300373 (3), X-linked dominant
AMH	Anti-Mullerian hormone	600957	Persistent Mullerian duct syndrome, type I, 261550 (3), Autosomal recessive
AMHR2	Anti-Mullerian hormone receptor, type II	600956	Persistent Mullerian duct syndrome, type II, 261550 (3), Autosomal recessive
AMMECR1	Alport syndrome, mental retardation, midface hypoplasia, and elliptocytosis chromosomal region gene 1	300195	Midface hypoplasia, hearing impairment, elliptocytosis, and nephrocalcinosis, 300990 (3), X-linked recessive
AMN	Amnion associated transmembrane protein	605799	Megaloblastic anemia-1, Norwegian type, 261100 (3), Autosomal recessive
AMPD1	Adenosine monophosphate deaminase-1, muscle	102770	Myopathy due to myoadenylate deaminase deficiency, 615511 (3), Autosomal recessive
AMPD2	Adenosine monophosphate deaminase-2, isoform L	102771	?Spastic paraplegia 63, 615686 (3), Autosomal recessive; Pontocerebellar hypoplasia, type 9, 615809 (3), Autosomal recessive
AMPD3	Adenosine monophosphate deaminase-3, isoform E	102772	[AMP deaminase deficiency, erythrocytic], 612874 (3), Autosomal recessive
AMT	Aminomethyltransferase (glycine cleavage system protein T)	238310	Glycine encephalopathy, 605899 (3), Autosomal recessive
AMTN	Amelotin	610912	?Amelogenesis imperfecta, type IIIB, 617607 (3), Autosomal dominant
ANAPC1	Anaphase-promoting complex, subunit 1	608473	Rothmund-Thomson syndrome, type 1, 618625 (3), Autosomal recessive
ANG	Angiogenin	105850	Amyotrophic lateral sclerosis 9, 611895 (3)
ANGPTL3	Angiopoietin-like 3	604774	Hypobetalipoproteinemia, familial, 2, 605019 (3), Autosomal recessive
ANGPTL4	Angiopoietin-like 4	605910	Plasma triglyceride level QTL, low, 615881 (3), Autosomal dominant
ANK1	Ankyrin-1, erythrocytic	612641	Spherocytosis, type 1, 182900 (3), Autosomal recessive, Autosomal dominant
ANK2	Ankyrin-2, nonerythrocytic	106410	Cardiac arrhythmia, ankyrin-B-related, 600919 (3), Autosomal dominant; Long QT syndrome 4, 600919 (3), Autosomal dominant
ANK3	Ankyrin-3, node of Ranvier	600465	?Mental retardation, autosomal recessive, 37, 615493 (3), Autosomal recessive
ANKH	ANKH inorganic pyrophosphate transport regulator	605145	Craniometaphyseal dysplasia, 123000 (3), Autosomal dominant; Chondrocalcinosis 2, 118600 (3), Autosomal dominant
ANKLE2	Ankyrin repeat- and LEM domain-containing protein 2	616062	Microcephaly 16, primary, autosomal recessive, 616681 (3), Autosomal recessive
ANKRD11	Ankyrin repeat domain-containing protein 11	611192	KBG syndrome, 148050 (3), Autosomal dominant
ANKRD26	Ankyrin repeat domain-containing protein 26	610855	Thrombocytopenia 2, 188000 (3), Autosomal dominant
ANKS6	Ankyrin repeat and sterile alpha motif domains-containing protein 6	615370	Nephronophthisis 16, 615382 (3), Autosomal recessive
ANLN	Actin-binding protein anillin	616027	Focal segmental glomerulosclerosis 8, 616032 (3), Autosomal dominant
ANO10	Anoctamin 10	613726	Spinocerebellar ataxia, autosomal recessive 10, 613728 (3), Autosomal recessive
ANO3	Anoctamin 3	610110	Dystonia 24, 615034 (3), Autosomal dominant
ANO5	Anoctamin 5	608662	Miyoshi muscular dystrophy 3, 613319 (3), Autosomal recessive; Muscular dystrophy, limb-girdle, autosomal recessive 12, 611307 (3), Autosomal recessive; Gnathodiaphyseal dysplasia, 166260 (3), Autosomal dominant
ANO6	Anoctamin 6	608663	Scott syndrome, 262890 (3), Autosomal recessive
ANOS1	Kallmann syndrome-1 sequence (anosmin-1)	300836	Hypogonadotropic hypogonadism 1 with or without anosmia (Kallmann syndrome 1), 308700 (3), X-linked recessive
ANTXR1	Anthrax toxin receptor 1	606410	GAPO syndrome, 230740 (3), Autosomal recessive; {?Hemangioma, capillary infantile, susceptibility to}, 602089 (3), Autosomal dominant
ANTXR2	Anthrax toxin receptor 2	608041	Hyaline fibromatosis syndrome, 228600 (3), Autosomal recessive
ANXA11	Annexin A11 (annexin XI)	602572	Amytrophic lateral sclerosis 23, 617839 (3), Autosomal dominant
ANXA5	Annexin A5 (endonexin II)	131230	{Pregnancy loss, recurrent, susceptibility to, 3}, 614391 (3), Autosomal dominant
AP1S1	Adaptor-related protein complex 1, sigma 1 subunit	603531	MEDNIK syndrome, 609313 (3), Autosomal recessive
AP1S2	Adaptor-related protein complex 1, sigma-2 subunit	300629	Mental retardation, X-linked syndromic 5, 304340 (3), X-linked recessive
AP1S3	Adaptor-related protein complex 1, sigma-3 subunit	615781	{Psoriasis 15, pustular, susceptibility to}, 616106 (3), Autosomal dominant
AP2M1	Adaptor-related protein complex 2, mu 1 subunit	601024	Intellectual developmental disorder 60 with seizures, 618587 (3), Autosomal dominant
AP2S1	Adaptor-related protein complex 2, sigma 1 subunit	602242	Hypocalciuric hypercalcemia, type III, 600740 (3), Autosomal dominant
AP3B1	Adaptor-related protein complex 3, beta 1 subunit (adaptin, beta-3a)	603401	Hermansky-Pudlak syndrome 2, 608233 (3), Autosomal recessive
AP3B2	Adaptor-related protein complex 3, beta 2 subunit	602166	Epileptic encephalopathy, early infantile, 48, 617276 (3), Autosomal recessive
AP3D1	Adaptor-related protein complex 3, delta-1 subunit	607246	?Hermansky-Pudlak syndrome 10, 617050 (3), Autosomal recessive
AP4B1	Adaptor-related protein complex 4, beta-1 subunit	607245	Spastic paraplegia 47, autosomal recessive, 614066 (3), Autosomal recessive
AP4E1	Adaptor-related protein complex 4, epsilon-1 subunit	607244	Stuttering, familial persistent, 1, 184450 (3), Autosomal dominant; Spastic paraplegia 51, autosomal recessive, 613744 (3), Autosomal recessive
AP4M1	Adaptor-related protein complex 4, mu-1 subunit	602296	Spastic paraplegia 50, autosomal recessive, 612936 (3), Autosomal recessive
AP4S1	Adaptor-related protein complex 4, sigma-1 subunit	607243	Spastic paraplegia 52, autosomal recessive, 614067 (3), Autosomal recessive
AP5Z1	Adaptor-related protein complex 5, zeta-1 subunit	613653	Spastic paraplegia 48, autosomal recessive, 613647 (3), Autosomal recessive
APC	Adenomatous polyposis coli	611731	Adenoma, periampullary, somatic (3); Desmoid disease, hereditary, 135290 (3), Autosomal dominant; Adenomatous polyposis coli, 175100 (3), Autosomal dominant; Gardner syndrome, 175100 (3), Autosomal dominant; Hepatoblastoma, somatic, 114550 (3); Colorectal cancer, somatic, 114500 (3); Brain tumor-polyposis syndrome 2, 175100 (3), Autosomal dominant; Gastric cancer, somatic, 613659 (3)
APC2	APC regulator of WNT signaling pathway 2	612034	?Sotos syndrome 3, 617169 (3), Autosomal recessive; Cortical dysplasia, complex, with other brain malformations 10, 618677 (3), Autosomal recessive
APCDD1	Adenomatosis polyposis coli down-regulated 1	607479	Hypotrichosis 1, 605389 (3), Autosomal dominant
APCS	Amyloid P component, serum	104770	{?Amyloidosis, secondary, susceptibility to} (1)
APOA1	Apolipoprotein A-I	107680	Hypoalphalipoproteinemia, primary, 2, with or without corneal clouding, 618463 (3); Amyloidosis, 3 or more types, 105200 (3), Autosomal dominant; ApoA-I and apoC-III deficiency, combined, 618463 (3)
APOA2	Apolipoprotein A-II	107670	Apolipoprotein A-II deficiency (3); {Hypercholesterolemia, familial, modifier of}, 143890 (3), Autosomal dominant
APOA5	Apolipoprotein A-V	606368	{Hypertriglyceridemia, susceptibility to}, 145750 (3), Autosomal dominant; Hyperchylomicronemia, late-onset, 144650 (3), Autosomal dominant
APOB	Apolipoprotein B (including Ag(x) antigen)	107730	Hypobetalipoproteinemia, 615558 (3), Autosomal recessive; Hypercholesterolemia, familial, 2, 144010 (3), Autosomal dominant
APOC2	Apolipoprotein C-II	608083	Hyperlipoproteinemia, type Ib, 207750 (3), Autosomal recessive
APOC3	Apolipoprotein C-III	107720	Apolipoprotein C-III deficiency, 614028 (3)
APOE	Apolipoprotein E	107741	Hyperlipoproteinemia, type III, 617347 (3); {Coronary artery disease, severe, susceptibility to}, 617347 (3); {?Alzheimer disease, protection against, due to APOE3-Christchurch}, 607822 (3), Autosomal dominant; Lipoprotein glomerulopathy, 611771 (3); Sea-blue histiocyte disease, 269600 (3), Autosomal recessive; {?Macular degeneration, age-related}, 603075 (3), Autosomal dominant; Alzheimer diseas…
APOL1	Apolipoprotein L1	603743	{End-stage renal disease, nondiabetic, susceptibility to}, 612551 (3); {Glomerulosclerosis, focal segmental, 4, susceptibility to}, 612551 (3)
APOL2	Apolipoprotein L2	607252	{Schizophrenia}, 181500 (1), Autosomal dominant
APOL4	Apolipoprotein L4	607254	{Schizophrenia}, 181500 (1), Autosomal dominant
APP	Amyloid beta (A4) precursor protein	104760	Cerebral amyloid angiopathy, Dutch, Italian, Iowa, Flemish, Arctic variants, 605714 (3), Autosomal dominant; Alzheimer disease 1, familial, 104300 (3), Autosomal dominant
APPL1	Adaptor protein containing PH domain, PTB domain, and leucine zipper motif 1	604299	{Maturity-onset diabetes of the young, type 14}, 616511 (3), Autosomal dominant
APRT	Adenine phosphoribosyltransferase	102600	Adenine phosphoribosyltransferase deficiency, 614723 (3), Autosomal recessive
APTX	Aprataxin	606350	Ataxia, early-onset, with oculomotor apraxia and hypoalbuminemia, 208920 (3), Autosomal recessive
AQP1	Aquaporin-1 (channel-forming integral protein, 28kD)	107776	[Blood group, Colton], 110450 (3); [Aquaporin-1 deficiency], 110450 (3)
AQP2	Aquaporin-2 (collecting duct)	107777	Diabetes insipidus, nephrogenic, 125800 (3), Autosomal recessive, Autosomal dominant
AQP3	Aquaporin-3	600170	[Blood group GIL], 607457 (3)
AQP5	Aquaporin-5	600442	Palmoplantar keratoderma, Bothnian type, 600231 (3), Autosomal dominant
AQP7	Aquaporin-7	602974	[Glycerol quantitative trait locus], 614411 (3), Autosomal recessive
AR	Androgen receptor (dihydrotestosterone receptor)	313700	Hypospadias 1, X-linked, 300633 (3), X-linked recessive; Androgen insensitivity, 300068 (3), X-linked recessive; {Prostate cancer, susceptibility to}, 176807 (3), Autosomal dominant, Somatic mutation; Androgen insensitivity, partial, with or without breast cancer, 312300 (3), X-linked recessive; Spinal and bulbar muscular atrophy of Kennedy, 313200 (3), X-linked recessive
ARCN1	Archain 1	600820	Short stature, rhizomelic, with microcephaly, micrognathia, and developmental delay, 617164 (3), Autosomal dominant
ARF1	ADP-ribosylation factor-1	103180	Periventricular nodular heterotopia 8, 618185 (3), Autosomal dominant
ARFGEF2	ADP-ribosylation factor guanine nucleotide-exchange factor 2, brefeldin A-inhibited	605371	Periventricular heterotopia with microcephaly, 608097 (3), Autosomal recessive
ARG1	Arginase, liver	608313	Argininemia, 207800 (3), Autosomal recessive
ARHGAP26	RHO GTPase-activating protein 26	605370	Leukemia, juvenile myelomonocytic, somatic, 607785 (3)
ARHGAP31	Rho GTPase-activating protein 31	610911	Adams-Oliver syndrome 1, 100300 (3), Autosomal dominant
ARHGDIA	Rho GDP dissociation inhibitor (GDI) alpha	601925	Nephrotic syndrome, type 8, 615244 (3), Autosomal recessive
ARHGEF1	Rho guanine nucleotide exchange factor, 115-kD	601855	?Immunodeficiency 62, 618459 (3), Autosomal recessive
ARHGEF10	Rho guanine nucleotide exchange factor 10	608136	?Slowed nerve conduction velocity, AD, 608236 (3), Autosomal dominant
ARHGEF18	Rho guanine nucleotide exchange factor 18	616432	Retinitis pigmentosa 78, 617433 (3), Autosomal recessive
ARHGEF2	RHO guanine nucleotide exchange factor 2	607560	?Neurodevelopmental disorder with midbrain and hindbrain malformations, 617523 (3), Autosomal recessive
ARHGEF9	Rho guanine nucleotide exchange factor 9	300429	Epileptic encephalopathy, early infantile, 8, 300607 (3), X-linked recessive
ARID1A	AT rich interactive domain 1A, SWI-like	603024	Coffin-Siris syndrome 2, 614607 (3), Autosomal dominant
ARID1B	AT-rich interaction domain-containing protein 1B	614556	Coffin-Siris syndrome 1, 135900 (3), Autosomal dominant
ARID2	AT-rich interaction domain-containing protein 2	609539	Coffin-Siris syndrome 6, 617808 (3), Autosomal dominant
ARL13B	ADP-ribosylation factor-like 13B	608922	Joubert syndrome 8, 612291 (3), Autosomal recessive
ARL2BP	ADP ribosylation factor-like 2-binding protein	615407	Retinitis pigmentosa with or without situs inversus, 615434 (3), Autosomal recessive
ARL3	ADP-ribosylation factor-like 3	604695	Joubert syndrome 35, 618161 (3), Autosomal recessive; Retinitis pigmentosa 83, 618173 (3), Autosomal dominant
ARL6	ADP-ribosylation factor-like 6	608845	?Retinitis pigmentosa 55, 613575 (3); Bardet-Biedl syndrome 3, 600151 (3), Autosomal recessive; {Bardet-Biedl syndrome 1, modifier of}, 209900 (3), Autosomal recessive, Digenic recessive
ARL6IP1	ADP-ribosylation factor-like 6 interacting protein 1	607669	?Spastic paraplegia 61, autosomal recessive, 615685 (3), Autosomal recessive
ARMC2	Armadillo repeat containing 2	618424	Spermatogenic failure 38, 618433 (3), Autosomal recessive
ARMC4	Armadillo repeat-containing protein 4	615408	Ciliary dyskinesia, primary, 23, 615451 (3), Autosomal recessive
ARMC5	Armadillo repeat-containing protein 5	615549	ACTH-independent macronodular adrenal hyperplasia 2, 615954 (3), Autosomal dominant, Somatic mutation
ARMC9	Armadillo repeat-containing protein 9	617612	Joubert syndrome 30, 617622 (3), Autosomal recessive
ARMS2	LOC387715 gene	611313	{Macular degeneration, age-related, 8}, 613778 (3)
ARNT2	Aryl hydrocarbon receptor nuclear translocator 2	606036	?Webb-Dattani syndrome, 615926 (3), Autosomal recessive
ARPC1B	Actin-related protein 2/3 complex, subunit 1B	604223	Platelet abnormalities with eosinophilia and immune-mediated inflammatory disease, 617718 (3), Autosomal recessive
ARR3	Arrestin 3, retinal	301770	Myopia 26, X-linked, female-limited, 301010 (3), X-linked
ARSA	Arylsulfatase A	607574	Metachromatic leukodystrophy, 250100 (3), Autosomal recessive
ARSB	Arylsulfatase B	611542	Mucopolysaccharidosis type VI (Maroteaux-Lamy), 253200 (3), Autosomal recessive
ARSG	Arylsulfatase G	610008	Usher syndrome, type IV, 618144 (3), Autosomal recessive
ARSL	Arylsulfatase E	300180	Chondrodysplasia punctata, X-linked recessive, 302950 (3), X-linked recessive
ART4	ADP-ribosyltransferase-4 (Dombrock blood group)	110600	[Blood group, Dombrock], 616060 (3)
ARV1	ARV1 homolog, fatty acid homeostasis modulator	611647	Epileptic encephalopathy, early infantile, 38, 617020 (3), Autosomal recessive
ARX	Aristaless-related homeobox, X-linked	300382	Epileptic encephalopathy, early infantile, 1, 308350 (3), X-linked recessive; Lissencephaly, X-linked 2, 300215 (3), X-linked; Proud syndrome, 300004 (3), X-linked; Mental retardation, X-linked 29 and others, 300419 (3), X-linked recessive; Partington syndrome, 309510 (3), X-linked recessive; Hydranencephaly with abnormal genitalia, 300215 (3), X-linked
ASAH1	N-acylsphingosine amidohydrolase (acid ceramidase) 1	613468	Farber lipogranulomatosis, 228000 (3), Autosomal recessive; Spinal muscular atrophy with progressive myoclonic epilepsy, 159950 (3), Autosomal recessive
ASB10	Ankyrin repeat- and SOCS box-containing protein 10	615054	Glaucoma 1, open angle, F, 603383 (3)
ASCC1	Activating signal cointegrator 1 complex, subunit 1	614215	?Spinal muscular atrophy with congenital bone fractures 2, 616867 (3), Autosomal recessive; Barrett esophagus/esophageal adenocarcinoma, 614266 (3)
ASCL1	Achaete-scute family bHLH transcription factor 1	100790	Haddad syndrome, 209880 (3), Autosomal dominant; Central hypoventilation syndrome, congenital, 209880 (3), Autosomal dominant
ASH1L	ASH1-like histone lysine methyltransferase	607999	Mental retardation, autosomal dominant 52, 617796 (3), Autosomal dominant
ASIP	Agouti, mouse, signaling protein	600201	[Skin/hair/eye pigmentation 9, brown/nonbrown eyes], 611742 (3); [Skin/hair/eye pigmentation 9, dark/light hair], 611742 (3)
ASL	Argininosuccinate lyase	608310	Argininosuccinic aciduria, 207900 (3), Autosomal recessive
ASNS	Asparagine synthetase	108370	Asparagine synthetase deficiency, 615574 (3), Autosomal recessive
ASPA	Aspartoacylase (aminoacylase-2)	608034	Canavan disease, 271900 (3), Autosomal recessive
ASPH	Aspartate beta-hydroxylase (junctin; junctate)	600582	Traboulsi syndrome, 601552 (3), Autosomal recessive
ASPM	Abnormal spindle-like, microcephaly-associated	605481	Microcephaly 5, primary, autosomal recessive, 608716 (3), Autosomal recessive
ASPN	Asporin	608135	{Osteoarthritis susceptibility 3}, 607850 (3), Autosomal dominant; {Lumbar disc degeneration}, 603932 (3)
ASPSCR1	Alveolar soft-part sarcoma chromosome region, candidate 1	606236	Alveolar soft-part sarcoma, 606243 (3)
ASS1	Argininosuccinate synthetase 1	603470	Citrullinemia, 215700 (3), Autosomal recessive
ASXL1	Additional sex combs-like 1	612990	Bohring-Opitz syndrome, 605039 (3), Autosomal dominant; Myelodysplastic syndrome, somatic, 614286 (3)
ASXL2	Additional sex combs-like 2	612991	Shashi-Pena syndrome, 617190 (3), Autosomal dominant
ASXL3	Additional sex combs-like 3	615115	Bainbridge-Ropers syndrome, 615485 (3), Autosomal dominant
ATAD1	ATPase family, AAA domain-containing, member 1	614452	Hyperekplexia 4, 618011 (3), Autosomal recessive
ATAD3A	ATPase family, AAA domain-containing, member 3A	612316	Harel-Yoon syndrome, 617183 (3), Autosomal recessive, Autosomal dominant
ATCAY	Caytaxin	608179	Ataxia, cerebellar, Cayman type, 601238 (3), Autosomal recessive
ATF6	Activating transcription factor-6	605537	Achromatopsia 7, 616517 (3), Autosomal recessive
ATG16L1	Autophagy related 16 like 1	610767	{Inflammatory bowel disease (Crohn disease) 10}, 611081 (3)
ATG5	Autophagy related 5	604261	?Spinocerebellar ataxia, autosomal recessive 25, 617584 (3), Autosomal recessive
ATIC	5-aminoimidazole-4-carboxyamide ribonucleotide formyltransferase/IMP cyclohydrolase	601731	AICA-ribosiduria due to ATIC deficiency, 608688 (3), Autosomal recessive
ATL1	Atlastin GTPase 1	606439	Spastic paraplegia 3A, autosomal dominant, 182600 (3), Autosomal dominant; Neuropathy, hereditary sensory, type ID, 613708 (3), Autosomal dominant
ATL3	Atlastin 3	609369	Neuropathy, hereditary sensory, type IF, 615632 (3), Autosomal dominant
ATM	Ataxia-telangiectasia mutated (includes complementation groups A, C, D, and E)	607585	Lymphoma, mantle cell, somatic (3); Lymphoma, B-cell non-Hodgkin, somatic (3); Ataxia-telangiectasia, 208900 (3), Autosomal recessive; {Breast cancer, susceptibility to}, 114480 (3), Autosomal dominant, Somatic mutation; T-cell prolymphocytic leukemia, somatic (3)
ATN1	Atrophin 1	607462	Dentatorubral-pallidoluysian atrophy, 125370 (3), Autosomal dominant; Congenital hypotonia, epilepsy, developmental delay, and digital anomalies, 618494 (3), Autosomal dominant
ATOH7	Atonal, Drosophila, homolog of, 7	609875	Persistent hyperplastic primary vitreous, autosomal recessive, 221900 (3), Autosomal recessive
ATP11C	ATPase, class VI, type 11C	300516	?Hemolytic anemia, congenital, X-linked, 301015 (3), X-linked recessive
ATP13A2	ATPase, type 13A2	610513	Kufor-Rakeb syndrome, 606693 (3), Autosomal recessive; Spastic paraplegia 78, autosomal recessive, 617225 (3), Autosomal recessive
ATP1A1	ATPase, Na+K+ transporting, alpha-1 polypeptide	182310	Charcot-Marie-Tooth disease, axonal, type 2DD, 618036 (3), Autosomal dominant; Hypomagnesemia, seizures, and mental retardation 2, 618314 (3), Autosomal dominant
ATP1A2	ATPase, Na+K+ transporting, alpha-2 polypeptide	182340	Migraine, familial hemiplegic, 2, 602481 (3), Autosomal dominant; Migraine, familial basilar, 602481 (3), Autosomal dominant; Alternating hemiplegia of childhood 1, 104290 (3), Autosomal dominant
ATP1A3	ATPase, Na+K+ transporting, alpha-3 polypeptide	182350	CAPOS syndrome, 601338 (3), Autosomal dominant; Alternating hemiplegia of childhood 2, 614820 (3), Autosomal dominant; Dystonia-12, 128235 (3), Autosomal dominant
ATP1B1	ATPase, Na+K+ transporting, beta-1 polypeptide	182330	[Blood pressure regulation QTL], 145500 (2), Multifactorial
ATP2A1	ATPase, Ca++ transporting, fast-twitch, 1	108730	Brody myopathy, 601003 (3), Autosomal recessive
ATP2A2	ATPase, Ca++ transporting, slow-twitch, cardiac muscle-2	108740	Acrokeratosis verruciformis, 101900 (3), Autosomal dominant; Darier disease, 124200 (3), Autosomal dominant
ATP2B2	ATPase, Ca++ transporting, plasma membrane, 2	108733	{Deafness, autosomal recessive 12, modifier of}, 601386 (3), Autosomal recessive
ATP2B3	ATPase, Ca++ transporting, plasma membrane, 3	300014	?Spinocerebellar ataxia, X-linked 1, 302500 (3), X-linked recessive
ATP2C1	ATPase, Ca(2+)-sequestering	604384	Hailey-Hailey disease, 169600 (3), Autosomal dominant
ATP5F1A	ATP synthase, H+ transporting (ATPase, mitochondrial)	164360	?Mitochondrial complex V (ATP synthase) deficiency, nuclear type 4, 615228 (3), Autosomal recessive; ?Combined oxidative phosphorylation deficiency 22, 616045 (3), Autosomal recessive
ATP5F1D	ATP synthase F1 subunit delta	603150	Mitochondrial complex V (ATP synthase) deficiency, 618120 (3), Autosomal recessive
ATP5F1E	ATP synthase, H+ transporting, mitochondrial F1 complex, epsilon subunit	606153	?Mitochondrial complex V (ATP synthase) deficiency, nuclear type 3, 614053 (3)
ATP5MD	ATP synthase membrane subunit DAPIT	615204	Mitochondrial complex V (ATP synthase) deficiency, nuclear type 6, 618683 (3), Autosomal recessive
ATP6AP1	ATPase, H+ transporting, lysosomal, accessory protein 1	300197	Immunodeficiency 47, 300972 (3), X-linked recessive
ATP6AP2	ATPase, H+ transporting, lysosomal, accessory protein 2	300556	Mental retardation, X-linked, syndromic, Hedera type, 300423 (3), X-linked recessive; ?Parkinsonism with spasticity, X-linked, 300911 (3), X-linked recessive
ATP6V0A2	ATPase, H+ transporting, V0 subunit A2	611716	Wrinkly skin syndrome, 278250 (3), Autosomal recessive; Cutis laxa, autosomal recessive, type IIA, 219200 (3), Autosomal recessive
ATP6V0A4	ATPase, H+ transporting, V0 subunit a4	605239	Renal tubular acidosis, distal, autosomal recessive, 602722 (3)
ATP6V1A	ATPase, H+ transporting, V1 subunit A	607027	Epileptic encephalopathy, infantile or early childhood, 3, 618012 (3), Autosomal dominant; Cutis laxa, autosomal recessive, type IID, 617403 (3), Autosomal recessive
ATP6V1B1	ATPase, H+ transporting, lysosomal, beta polypeptide, 58kD (vacuolar proton pump, subunit 3)	192132	Renal tubular acidosis with deafness, 267300 (3), Autosomal recessive
ATP6V1B2	ATPase, H+ transporting, V1 subunit B2	606939	Zimmermann-Laband syndrome 2, 616455 (3), Autosomal dominant; Deafness, congenital, with onychodystrophy, autosomal dominant, 124480 (3), Autosomal dominant
ATP6V1E1	ATPase, H+ transporting, V1 subunit E1	108746	Cutis laxa, autosomal recessive, type IIC, 617402 (3), Autosomal recessive
ATP7A	ATPase, Cu++ transporting, alpha polypeptide	300011	Occipital horn syndrome, 304150 (3), X-linked recessive; Menkes disease, 309400 (3), X-linked recessive; Spinal muscular atrophy, distal, X-linked 3, 300489 (3), X-linked recessive
ATP7B	ATPase, Cu++ transporting, beta polypeptide	606882	Wilson disease, 277900 (3), Autosomal recessive
ATP8A2	ATPase, class I, type 8A, member 2	605870	?Cerebellar ataxia, mental retardation, and dysequilibrium syndrome 4, 615268 (3), Autosomal recessive
ATP8B1	ATPase, class I, type 8B, member 1	602397	Cholestasis, intrahepatic, of pregnancy, 1, 147480 (3), Autosomal dominant; Cholestasis, progressive familial intrahepatic 1, 211600 (3), Autosomal recessive; Cholestasis, benign recurrent intrahepatic, 243300 (3), Autosomal recessive
ATPAF2	ATP synthase, mitochondrial F1 complex, assembly factor 2	608918	?Mitochondrial complex V (ATP synthase) deficiency, nuclear type 1, 604273 (3), Autosomal recessive
ATR	Ataxia-telangiectasia and Rad3-related (FRAP-related protein-1)	601215	Seckel syndrome 1, 210600 (3), Autosomal recessive; ?Cutaneous telangiectasia and cancer syndrome, familial, 614564 (3), Autosomal dominant
ATRX	ATR-X gene (helicase 2; X-linked nuclear protein)	300032	Alpha-thalassemia/mental retardation syndrome, 301040 (3), X-linked dominant; Alpha-thalassemia myelodysplasia syndrome, somatic, 300448 (3); Mental retardation-hypotonic facies syndrome, X-linked, 309580 (3), X-linked recessive
ATXN1	Ataxin-1	601556	Spinocerebellar ataxia 1, 164400 (3), Autosomal dominant
ATXN10	Ataxin 10	611150	Spinocerebellar ataxia 10, 603516 (3), Autosomal dominant
ATXN2	Ataxin-2	601517	{Amyotrophic lateral sclerosis, susceptibility to, 13}, 183090 (3), Autosomal dominant; {Parkinson disease, late-onset, susceptibility to}, 168600 (3), Autosomal dominant, Multifactorial; Spinocerebellar ataxia 2, 183090 (3), Autosomal dominant
ATXN3	Ataxin-3 (josephin)	607047	Machado-Joseph disease, 109150 (3), Autosomal dominant
ATXN7	Ataxin 7	607640	Spinocerebellar ataxia 7, 164500 (3), Autosomal dominant
ATXN8	Ataxin 8	613289	Spinocerebellar ataxia 8, 608768 (3), Autosomal dominant
ATXN8OS	Ataxin 8 opposite strand	603680	Spinocerebellar ataxia 8, 608768 (3), Autosomal dominant; {Parkinson disease, susceptibility to}, 168600 (3), Autosomal dominant, Multifactorial
AUH	AU-specific RNA-binding protein (3-methylglutaconyl-CoA hydratase)	600529	3-methylglutaconic aciduria, type I, 250950 (3), Autosomal recessive
AURKA	Aurora kinase A	603072	{Colon cancer, susceptibility to}, 114500 (3), Autosomal dominant, Somatic mutation
AURKC	Aurora kinase C	603495	Spermatogenic failure 5, 243060 (3), Autosomal recessive
AUTS2	KIAA0442 gene	607270	Mental retardation, autosomal dominant 26, 615834 (3), Autosomal dominant
AVIL	Advillin	613397	Nephrotic syndrome, type 21, 618594 (3), Autosomal recessive
AVP	Arginine vasopressin (neurophysin II, antidiuretic hormone)	192340	Diabetes insipidus, neurohypophyseal, 125700 (3), Autosomal dominant
AVPR2	Arginine vasopressin receptor-2	300538	Nephrogenic syndrome of inappropriate antidiuresis, 300539 (3), X-linked recessive; Diabetes insipidus, nephrogenic, 304800 (3), X-linked recessive
AXIN1	Axis inhibitor 1	603816	Hepatocellular carcinoma, somatic, 114550 (3); ?Caudal duplication anomaly, 607864 (3)
AXIN2	Axis inhibitor 2 (conductin, mouse, homolog of)	604025	Colorectal cancer, somatic, 114500 (3); Oligodontia-colorectal cancer syndrome, 608615 (3), Autosomal dominant
B2M	Beta-2-microglobulin	109700	Immunodeficiency 43, 241600 (3), Autosomal recessive; ?Amyloidosis, familial visceral, 105200 (3), Autosomal dominant
B3GALNT1	UDP-galactose:beta-N-acetylglucosamine beta-1,3-galactosyltransferase 3	603094	[Blood group, globoside system], 615021 (3); [Blood group, P1PK system, P(k) phenotype], 111400 (3)
B3GALNT2	Beta-1,3-N-acetylgalactosaminyltransferase 2	610194	Muscular dystrophy-dystroglycanopathy (congenital with brain and eye anomalies, type A, 11, 615181 (3), Autosomal recessive
B3GALT6	UDP-Gal:beta-Gal beta-1,3-galactosyltransferase polypeptide 6	615291	Ehlers-Danlos syndrome, spondylodysplastic type, 2, 615349 (3), Autosomal recessive; Spondyloepimetaphyseal dysplasia with joint laxity, type 1, with or without fractures, 271640 (3), Autosomal recessive
B3GAT3	Beta-1,3-glucuronyltransferase 3	606374	Multiple joint dislocations, short stature, craniofacial dysmorphism, with or without congenital heart defects, 245600 (3), Autosomal recessive
B3GLCT	Beta 3-glucosyltransferase	610308	Peters-plus syndrome, 261540 (3), Autosomal recessive
B4GALNT1	Beta-1,4-N-acetylgalactosaminyltransferase 1	601873	Spastic paraplegia 26, autosomal recessive, 609195 (3), Autosomal recessive
B4GALT1	Glycoprotein-4-beta-galactosyltransferase-2 (EC 2.4.1.22)	137060	Congenital disorder of glycosylation, type IId, 607091 (3), Autosomal recessive
B4GALT7	Beta-1,4-galactosyltransferase 7	604327	Ehlers-Danlos syndrome, spondylodysplastic type, 1, 130070 (3), Autosomal recessive
B4GAT1	Beta-1,4glucuronyltransferase 1	605517	Muscular dystrophy-dystroglycanopathy (congenital with brain and eye anomalies), type A, 13, 615287 (3), Autosomal recessive
B9D1	B9 domain-containing protein 1	614144	?Meckel syndrome 9, 614209 (3), Autosomal recessive; Joubert syndrome 27, 617120 (3), Autosomal recessive
B9D2	B9 domain-containing protein 2	611951	Joubert syndrome 34, 614175 (3), Autosomal recessive; ?Meckel syndrome 10, 614175 (3), Autosomal recessive
BAAT	Bile acid coenzyme A:amino acid N-acyltransferase (glycine N-choloyltransferase)	602938	Hypercholanemia, familial, 607748 (3), Autosomal recessive
BACH2	BTB and CNC homology 2	605394	Immunodeficiency 60, 618394 (3), Autosomal dominant
BAG3	BCL2-associated athanogene 3	603883	Cardiomyopathy, dilated, 1HH, 613881 (3), Autosomal dominant; Myopathy, myofibrillar, 6, 612954 (3), Autosomal dominant
BANF1	Barrier to autointegration factor 1	603811	Nestor-Guillermo progeria syndrome, 614008 (3), Autosomal recessive
BAP1	BRCA1 associated protein-1 (ubiquitin carboxy-terminal hydrolase)	603089	Tumor predisposition syndrome, 614327 (3), Autosomal dominant
BARD1	BRCA1-associated RING domain 1	601593	{Breast cancer, susceptibility to}, 114480 (3), Autosomal dominant, Somatic mutation
BAX	BCL2-associated X protein	600040	T-cell acute lymphoblastic leukemia, somatic, 613065 (3); Colorectal cancer, somatic, 114500 (3)
BBIP1	BBSome interacting protein 1	613605	?Bardet-Biedl syndrome 18, 615995 (3), Autosomal recessive
BBS1	BBS1 gene	209901	Bardet-Biedl syndrome 1, 209900 (3), Autosomal recessive, Digenic recessive
BBS10	BBS10 gene	610148	Bardet-Biedl syndrome 10, 615987 (3), Autosomal recessive
BBS12	BBS12 gene	610683	Bardet-Biedl syndrome 12, 615989 (3), Autosomal recessive
BBS2	Bardet-Biedl syndrome 2	606151	Bardet-Biedl syndrome 2, 615981 (3), Autosomal recessive; Retinitis pigmentosa 74, 616562 (3), Autosomal recessive
BBS4	BBS4 gene	600374	Bardet-Biedl syndrome 4, 615982 (3), Autosomal recessive
BBS5	BBS gene 5	603650	Bardet-Biedl syndrome 5, 615983 (3), Autosomal recessive
BBS7	BBS7 gene	607590	Bardet-Biedl syndrome 7, 615984 (3), Autosomal recessive
BBS9	Parathyroid hormone-responsive B1 gene	607968	Bardet-Biedl syndrome 9, 615986 (3), Autosomal recessive
BCAM	B-cell adhesion molecule	612773	[Blood group, Lutheran null], 247420 (3), Autosomal recessive; [Blood group, Lutheran system], 111200 (3); [Blood group, Auberger system], 111200 (3)
BCAP31	B-cell receptor-associated protein 31	300398	Deafness, dystonia, and cerebral hypomyelination, 300475 (3), X-linked recessive
BCAT1	Branched chain aminotransferase-1, cytosolic	113520	?Hyperleucinemia-isoleucinemia or hypervalinemia (1)
BCAT2	Branched chain aminotransferase-2, mitochondrial	113530	?Hypervalinemia or hyperleucine-isoleucinemia (1)
BCHE	Butyrylcholinesterase	177400	{Apnea, postanesthetic, susceptibility to, due to BCHE deficiency}, 617936 (3); Butyrylcholinesterase deficiency, 617936 (3)
BCKDHA	Branched chain keto acid dehydrogenase E1, alpha polypeptide	608348	Maple syrup urine disease, type Ia, 248600 (3), Autosomal recessive
BCKDHB	Branched chain keto acid dehydrogenase E1, beta polypeptide	248611	Maple syrup urine disease, type Ib, 248600 (3), Autosomal recessive
BCKDK	Branched-chain alpha-keto acid dehydrogenase kinase	614901	Branched-chain ketoacid dehydrogenase kinase deficiency, 614923 (3)
BCL10	B-cell leukemia/lymphoma 10	603517	?Immunodeficiency 37, 616098 (3), Autosomal recessive; {Male germ cell tumor, somatic}, 273300 (3); Lymphoma, MALT, somatic, 137245 (3); {Sezary syndrome, somatic} (3); {Lymphoma, follicular, somatic}, 605027 (3); {Mesothelioma, somatic}, 156240 (3)
BCL11A	B-cell CLL/lymphoma 11A	606557	Dias-Logan syndrome, 617101 (3), Autosomal dominant
BCL11B	BAF chromatin remodeling complex subunit BCL11B	606558	Intellectual developmental disorder with dysmorphic facies, speech delay, and T-cell abnormalities, 618092 (3), Autosomal dominant; Immunodeficiency 49, 617237 (3), Autosomal dominant
BCL2	B-cell CLL/lymphoma-2	151430	Leukemia/lymphoma, B-cell, 2 (3)
BCL3	B-cell CLL/lymphoma-3	109560	Leukemia/lymphoma, B-cell, 3, 109560 (2)
BCL6	B-cell CLL/lymphoma-6	109565	Lymphoma, B-cell, 109565 (2)
BCL7A	B-cell CLL/lymphoma-7A	601406	B-cell non-Hodgkin lymphoma, high-grade (3)
BCO1	Beta-carotene oxygenase 1	605748	?Hypercarotenemia and vitamin A deficiency, autosomal dominant, 115300 (3), Autosomal dominant
BCOR	BCL6 corepressor	300485	Microphthalmia, syndromic 2, 300166 (3), X-linked dominant
BCORL1	BCL6 corepressor-like 1	300688	Shukla-Vernon syndrome, 301029 (3), X-linked recessive
BCR	Breakpoint cluster region	151410	Leukemia, chronic myeloid, Philadelphia chromosome positive, somatic, 608232 (4); Leukemia, acute lymphocytic, Philadelphia chromosome positive, somatic, 613065 (4)
BCS1L	BCS1 homolog, ubiquinol-cytochrome c reductase complex chaperone	603647	Leigh syndrome, 256000 (3), Autosomal recessive, Mitochondrial; GRACILE syndrome, 603358 (3), Autosomal recessive; Bjornstad syndrome, 262000 (3), Autosomal recessive; Mitochondrial complex III deficiency, nuclear type 1, 124000 (3), Autosomal recessive
BDP1	B double prime 1, subunit of RNA polymerase III transcription initiation factor IIIB	607012	?Deafness, autosomal recessive 112, 618257 (3), Autosomal recessive
BEAN1	Brain-expressed, associated with NEDD4	612051	Spinocerebellar ataxia 31, 117210 (3), Autosomal dominant
BEST1	Bestrophin 1	607854	Retinitis pigmentosa-50, 613194 (3); Bestrophinopathy, autosomal recessive, 611809 (3); Retinitis pigmentosa, concentric, 613194 (3); Vitreoretinochoroidopathy, 193220 (3), Autosomal dominant; Microcornea, rod-cone dystrophy, cataract, and posterior staphyloma, 193220 (3), Autosomal dominant; Macular dystrophy, vitelliform, 2, 153700 (3), Autosomal dominant
BFSP1	Beaded filament structural protein-1 (filensin)	603307	Cataract 33, multiple types, 611391 (3), Autosomal recessive, Autosomal dominant
BFSP2	Beaded filament structural protein 2 (cytoskeletal protein, 49 kD)	603212	Cataract 12, multiple types, 611597 (3), Autosomal dominant
BGN	Biglycan	301870	Meester-Loeys syndrome, 300989 (3), X-linked; Spondyloepimetaphyseal dysplasia, X-linked, 300106 (3), X-linked recessive
BHLHA9	Basic helix-loop-helix family, member A9	615416	Syndactyly, mesoaxial synostotic, with phalangeal reduction, 609432 (3), Autosomal recessive; ?Camptosynpolydactyly, complex, 607539 (3), Autosomal recessive
BHLHE41	Basic helix-loop-helix domain-containing protein, member E41	606200	[Short sleep, familial natural, 1], 612975 (3), Autosomal dominant
BICC1	Bicaudal C, Drosophila, homolog of, 1	614295	{Renal dysplasia, cystic, susceptibility to}, 601331 (3), Autosomal dominant
BICD2	Bicaudal D, Drosophila, homolog of, 2	609797	Spinal muscular atrophy, lower extremity-predominant, 2B, autosomal dominant, 618291 (3), Autosomal dominant; Spinal muscular atrophy, lower extremity-predominant, 2A, autosomal dominant, 615290 (3), Autosomal dominant
BIN1	Box-dependent MYC-interacting protein-1 (amphiphysin-like)	601248	Centronuclear myopathy 2, 255200 (3), Autosomal recessive
BLK	BLK nonreceptor tyrosine kinase	191305	Maturity-onset diabetes of the young, type 11, 613375 (3), Autosomal dominant
BLM	DNA helicase, RecQ-like 3	604610	Bloom syndrome, 210900 (3), Autosomal recessive
BLNK	B-cell linker protein (SH2 domain-containing leukocyte protein, 65kD)	604515	?Agammaglobulinemia 4, 613502 (3), Autosomal recessive
BLOC1S3	Biogenesis of lysosome-related organelles complex 1, subunit 3	609762	Hermansky-Pudlak syndrome 8, 614077 (3), Autosomal recessive
BLOC1S6	Biogenesis of lysosome-related organelles complex 1, subunit 6	604310	?Hermansky-pudlak syndrome 9, 614171 (3), Autosomal recessive
BLVRA	Biliverdin reductase A	109750	Hyperbiliverdinemia, 614156 (3), Autosomal recessive, Autosomal dominant
BMP1	Bone morphogenetic protein-1	112264	Osteogenesis imperfecta, type XIII, 614856 (3), Autosomal recessive
BMP15	Bone morphogenetic protein 15	300247	Ovarian dysgenesis 2, 300510 (3), X-linked; Premature ovarian failure 4, 300510 (3), X-linked
BMP2	Bone morphogenetic protein-2	112261	Brachydactyly, type A2, 112600 (3), Autosomal dominant; Short stature, facial dysmorphism, and skeletal anomalies with or without cardiac anomalies, 617877 (3), Autosomal dominant; {HFE hemochromatosis, modifier of}, 235200 (3), Autosomal recessive
BMP4	Bone morphogenetic protein-4	112262	Microphthalmia, syndromic 6, 607932 (3), Autosomal dominant; Orofacial cleft 11, 600625 (3)
BMPER	BMP binding endothelial regulator	608699	Diaphanospondylodysostosis, 608022 (3), Autosomal recessive
BMPR1A	Bone morphogenetic protein receptor, type IA	601299	Polyposis syndrome, hereditary mixed, 2, 610069 (3); Polyposis, juvenile intestinal, 174900 (3), Autosomal dominant; Juvenile polyposis syndrome, infantile form, 174900 (3), Autosomal dominant
BMPR1B	Bone morphogenetic protein receptor, type IB	603248	Brachydactyly, type A2, 112600 (3), Autosomal dominant; Brachydactyly, type A1, D, 616849 (3), Autosomal dominant; Acromesomelic dysplasia, Demirhan type, 609441 (3), Autosomal recessive
BMPR2	Bone morphogenetic receptor, type II	600799	Pulmonary venoocclusive disease 1, 265450 (3), Autosomal dominant; Pulmonary hypertension, familial primary, 1, with or without HHT, 178600 (3), Autosomal dominant; Pulmonary hypertension, primary, fenfluramine or dexfenfluramine-associated, 178600 (3), Autosomal dominant
BMS1	BMS1 ribosome biogenesis factor	611448	?Aplasia cutis congenita, nonsyndromic, 107600 (3), Autosomal dominant
BNC2	Basonuclin 2	608669	Lower urinary tract obstruction, congenital, 618612 (3), Autosomal dominant
BOLA3	bolA family member 3	613183	Multiple mitochondrial dysfunctions syndrome 2 with hyperglycinemia, 614299 (3), Autosomal recessive
BPGM	2,3-bisphosphoglycerate mutase	613896	Erythrocytosis, familial, 8, 222800 (3), Autosomal recessive
BPTF	Bromodomain PHD finger transcription factor	601819	Neurodevelopmental disorder with dysmorphic facies and distal limb anomalies, 617755 (3), Autosomal dominant
BRAF	Murine sarcoma viral (v-raf) oncogene homolog B1	164757	Nonsmall cell lung cancer, somatic (3); Melanoma, malignant, somatic (3); Noonan syndrome 7, 613706 (3), Autosomal dominant; Cardiofaciocutaneous syndrome, 115150 (3), Autosomal dominant; Colorectal cancer, somatic (3); Adenocarcinoma of lung, somatic, 211980 (3); LEOPARD syndrome 3, 613707 (3), Autosomal dominant
BRAT1	BRCA1-associated ATM activator 1	614506	Rigidity and multifocal seizure syndrome, lethal neonatal, 614498 (3), Autosomal recessive; Neurodevelopmental disorder with cerebellar atrophy and with or without seizures, 618056 (3), Autosomal recessive
BRCA1	Breast cancer-1 gene	113705	Fanconi anemia, complementation group S, 617883 (3), Autosomal recessive; {Pancreatic cancer, susceptibility to, 4}, 614320 (3); {Breast-ovarian cancer, familial, 1}, 604370 (3), Autosomal dominant, Multifactorial
BRCA2	BRCA2 gene	600185	{Pancreatic cancer 2}, 613347 (3); {Breast cancer, male, susceptibility to}, 114480 (3), Autosomal dominant, Somatic mutation; {Glioblastoma 3}, 613029 (3), Autosomal recessive; Wilms tumor, 194070 (3), Autosomal dominant, Somatic mutation; Fanconi anemia, complementation group D1, 605724 (3), Autosomal recessive; {Medulloblastoma}, 155255 (3), Autosomal recessive, Autosomal dominant, Somatic mut…
BRDT	Bromodomain, testis-specific	602144	?Spermatogenic failure 21, 617644 (3), Autosomal recessive
BRF1	BRF1, S. cerevisiae, homolog of (TATA box-binding protein-associated factor 3C)	604902	Cerebellofaciodental syndrome, 616202 (3), Autosomal recessive
BRIP1	BRCA1-associated C-terminal helicase 1	605882	Fanconi anemia, complementation group J, 609054 (3); {Breast cancer, early-onset, susceptibility to}, 114480 (3), Autosomal dominant, Somatic mutation
BRPF1	Bromodomain- and PHD finger-containing protein 1, 140kD	602410	Intellectual developmental disorder with dysmorphic facies and ptosis, 617333 (3), Autosomal dominant
BRWD3	Bromodomain-and WD repeat-containing protein 3	300553	Mental retardation, X-linked 93, 300659 (3), X-linked recessive
BSCL2	Seipin	606158	Lipodystrophy, congenital generalized, type 2, 269700 (3), Autosomal recessive; Silver spastic paraplegia syndrome, 270685 (3), Autosomal dominant; Neuropathy, distal hereditary motor, type VA, 600794 (3), Autosomal dominant; Encephalopathy, progressive, with or without lipodystrophy, 615924 (3), Autosomal recessive
BSG	Basigin (blood group OK)	109480	[Blood group, OK], 111380 (3)
BSND	Barttin	606412	Sensorineural deafness with mild renal dysfunction, 602522 (3), Autosomal recessive; Bartter syndrome, type 4a, 602522 (3), Autosomal recessive
BTD	Biotinidase	609019	Biotinidase deficiency, 253260 (3), Autosomal recessive
BTK	Bruton agammaglobulinemia tyrosine kinase	300300	Isolated growth hormone deficiency, type III, with agammaglobulinemia, 307200 (3), X-linked recessive; Agammaglobulinemia, X-linked 1, 300755 (3), X-linked recessive
BTNL2	Butyrophilin-like protein 2	606000	{Sarcoidosis, susceptibility to, 2}, 612387 (3), Autosomal dominant
BUB1	BUB1 mitotic checkpoint serine/threonine kinase	602452	Colorectal cancer with chromosomal instability, somatic, 114500 (3)
BUB1B	BUB1 mitotic checkpoint serine/threonine kinase B	602860	Colorectal cancer, somatic, 114500 (3); [Premature chromatid separation trait], 176430 (3), Autosomal dominant; Mosaic variegated aneuploidy syndrome 1, 257300 (3), Autosomal recessive
BVES	Blood vessel epicardial substance	604577	Muscular dystrophy, limb-girdle, autosomal recessive 25, 616812 (3), Autosomal recessive
C11orf80	Chromosome 11 open reading frame 80	616109	Hydatidiform mole, recurrent, 4, 618432 (3)
C12orf4	Chromosome 12 open reading frame 4	616082	Mental retardation, autosomal recessive 66, 618221 (3), Autosomal recessive
C12orf57	Chromosome 12 open reading frame 57	615140	Temtamy syndrome, 218340 (3), Autosomal recessive
C12orf65	Chromosome 12 open reading frame 65	613541	Spastic paraplegia 55, autosomal recessive, 615035 (3), Autosomal recessive; Combined oxidative phosphorylation deficiency 7, 613559 (3), Autosomal recessive
C15orf41	Chromosome 15 open reading fram 41	615626	Dyserythropoietic anemia, congenital, type Ib, 615631 (3), Autosomal recessive
C19orf12	Chromosome 19 open reading frame 12	614297	Neurodegeneration with brain iron accumulation 4, 614298 (3), Autosomal recessive, Autosomal dominant; ?Spastic paraplegia 43, autosomal recessive, 615043 (3), Autosomal recessive
C1GALT1C1	C1GALT1-specific chaperone 1	300611	Tn polyagglutination syndrome, somatic, 300622 (3)
C1QA	Complement component 1, q subcomponent, A chain	120550	C1q deficiency, 613652 (3), Autosomal recessive
C1QB	Complement component 1, q subcomponent, B chain	120570	C1q deficiency, 613652 (3), Autosomal recessive
C1QBP	Complement component C1q binding protein (hyaluronic acid-binding protein 1)	601269	Combined oxidative phosphorylation deficiency 33, 617713 (3), Autosomal recessive
C1QC	Complement component 1, q subcomponent, C chain	120575	C1q deficiency, 613652 (3), Autosomal recessive
C1QTNF5	C1q- and tumor necrosis factor-related protein 5	608752	Retinal degeneration, late-onset, autosomal dominant, 605670 (3), Autosomal dominant
C1R	Complement component-1, r subcomponent	613785	Ehlers-Danlos syndrome, periodontal type, 1, 130080 (3), Autosomal dominant
C1S	Complement component-1, s subcomponent	120580	Ehlers-Danlos syndrome, periodontal type, 2, 617174 (3), Autosomal dominant; C1s deficiency, 613783 (3)
C2	Complement component-2	613927	C2 deficiency, 217000 (3), Autosomal recessive; {Macular degeneration, age-related, 14, reduced risk of}, 615489 (3)
C2CD3	C2 calcium-dependent domain-containing protein 3	615944	Orofaciodigital syndrome XIV, 615948 (3), Autosomal recessive
C3	Complement component-3	120700	{Hemolytic uremic syndrome, atypical, susceptibility to, 5}, 612925 (3), Autosomal dominant; C3 deficiency, 613779 (3), Autosomal recessive; {Macular degeneration, age-related, 9}, 611378 (3)
C4A	Complement component-4A	120810	C4a deficiency, 614380 (3), Autosomal recessive; [Blood group, Rodgers], 614374 (3)
C4B	Complement component-4B	120820	C4B deficiency, 614379 (3)
C5	Complement component-5	120900	[Eculizumab, poor response to], 615749 (3), Autosomal dominant; C5 deficiency, 609536 (3)
C6	Complement component-6	217050	C6 deficiency, 612446 (3); Combined C6/C7 deficiency (3)
C7	Complement component-7	217070	C7 deficiency, 610102 (3)
C8A	Complement component-8, alpha polypeptide	120950	C8 deficiency, type I, 613790 (3), Autosomal recessive
C8B	Complement component-8, beta polypeptide	120960	C8 deficiency, type II, 613789 (3), Autosomal recessive
C8orf37	Chromosome 8 open reading frame 37	614477	Retinitis pigmentosa 64, 614500 (3), Autosomal recessive; Bardet-Biedl syndrome 21, 617406 (3), Autosomal recessive; Cone-rod dystrophy 16, 614500 (3), Autosomal recessive
C9	Complement component-9	120940	{Macular degeneration, age-related, 15, susceptibility to}, 615591 (3); C9 deficiency, 613825 (3)
C9orf72	Chromosome 9 open reading frame 72	614260	Frontotemporal dementia and/or amyotrophic lateral sclerosis 1, 105550 (3), Autosomal dominant
CA12	Carbonic anhydrase XII	603263	Hyperchlorhidrosis, isolated, 143860 (3), Autosomal recessive
CA2	Carbonic anhydrase II	611492	Osteopetrosis, autosomal recessive 3, with renal tubular acidosis, 259730 (3), Autosomal recessive
CA4	Carbonic anhydrase IV	114760	Retinitis pigmentosa 17, 600852 (3), Autosomal dominant
CA5A	Carbonic anhydrase VA (mitochondrial)	114761	Hyperammonemia due to carbonic anhydrase VA deficiency, 615751 (3), Autosomal recessive
CA8	Carbonic anhydrase VIII	114815	Cerebellar ataxia and mental retardation with or without quadrupedal locomotion 3, 613227 (3), Autosomal recessive
CABP2	Calcium-binding protein 2	607314	Deafness, autosomal recessive 93, 614899 (3), Autosomal recessive
CABP4	Calcium-binding protein 4	608965	Cone-rod synaptic disorder, congenital nonprogressive, 610427 (3), Autosomal recessive
CACNA1A	Calcium channel, voltage-dependent, P/Q type, alpha 1A subunit	601011	Spinocerebellar ataxia 6, 183086 (3), Autosomal dominant; Epileptic encephalopathy, early infantile, 42, 617106 (3), Autosomal dominant; Migraine, familial hemiplegic, 1, with progressive cerebellar ataxia, 141500 (3), Autosomal dominant; Episodic ataxia, type 2, 108500 (3), Autosomal dominant; Migraine, familial hemiplegic, 1, 141500 (3), Autosomal dominant
CACNA1B	Calcium channel, voltage-dependent, L type, alpha 1B subunit	601012	Neurodevelopmental disorder with seizures and nonepileptic hyperkinetic movements, 618497 (3), Autosomal recessive
CACNA1C	Calcium channel, voltage-dependent, L type, alpha 1C subunit	114205	Timothy syndrome, 601005 (3), Autosomal dominant; Long QT syndrome 8, 618447 (3); Brugada syndrome 3, 611875 (3)
CACNA1D	Calcium channel, voltage-dependent, L type, alpha 1D subunit	114206	Primary aldosteronism, seizures, and neurologic abnormalities, 615474 (3), Autosomal dominant; Sinoatrial node dysfunction and deafness, 614896 (3), Autosomal recessive
CACNA1E	Calcium channel, voltage-dependent, alpha 1E subunit	601013	Epileptic encephalopathy, early infantile, 69, 618285 (3), Autosomal dominant
CACNA1F	Calcium channel, voltage-dependent, alpha-1F subunit	300110	Cone-rod dystrophy, X-linked, 3, 300476 (3), X-linked recessive; Night blindness, congenital stationary (incomplete), 2A, X-linked, 300071 (3), X-linked; Aland Island eye disease, 300600 (3), X-linked
CACNA1G	Calcium channel, voltage-dependent, T type, alpha-1G subunit	604065	Spinocerebellar ataxia 42, 616795 (3), Autosomal dominant; Spinocerebellar ataxia 42, early-onset, severe, with neurodevelopmental deficits, 618087 (3), Autosomal dominant
CACNA1H	Calcium channel, voltage-dependent, T type, alpha-1H subunit	607904	{Epilepsy, childhood absence, susceptibility to, 6}, 611942 (3); {Epilepsy, idiopathic generalized, susceptibility to, 6}, 611942 (3); Hyperaldosteronism, familial, type IV, 617027 (3), Autosomal dominant
CACNA1S	Calcium channel, voltage-dependent, L type, alpha 1S subunit	114208	{Malignant hyperthermia susceptibility 5}, 601887 (3), Autosomal dominant; {Thyrotoxic periodic paralysis, susceptibility to, 1}, 188580 (3), Autosomal dominant; Hypokalemic periodic paralysis, type 1, 170400 (3), Autosomal dominant
CACNA2D2	Calcium channel, voltage-dependent, alpha-2/delta subunit 2	607082	Cerebellar atrophy with seizures and variable developmental delay, 618501 (3), Autosomal recessive
CACNA2D4	Calcium channel, voltage-dependent, alpha-2/delta subunit 4	608171	Retinal cone dystrophy 4, 610478 (3), Autosomal recessive
CACNB2	Calcium channel, voltage-dependent, beta 2 subunit	600003	Brugada syndrome 4, 611876 (3)
CACNB4	Calcium channel, voltage-dependent, beta 4 subunit	601949	{Epilepsy, idiopathic generalized, susceptibility to, 9}, 607682 (3), Autosomal dominant; {Epilepsy, juvenile myoclonic, susceptibility to, 6}, 607682 (3), Autosomal dominant; Episodic ataxia, type 5, 613855 (3), Autosomal dominant
CACNG2	Calcium channel, voltage-dependent, gamma-2 subunit (stargazin)	602911	?Mental retardation, autosomal dominant 10, 614256 (3), Autosomal dominant
CAD	CAD trifunctional protein of pyrimidine biosynthesis	114010	Epileptic encephalopathy, early infantile, 50, 616457 (3), Autosomal recessive
CALCR	Calcitonin receptor	114131	{Osteoporosis, postmenopausal, susceptibility}, 166710 (3), Autosomal dominant
CALM1	Calmodulin-1 (phosphorylase kinase, delta)	114180	Long QT syndrome 14, 616247 (3), Autosomal dominant; Ventricular tachycardia, catecholaminergic polymorphic, 4, 614916 (3), Autosomal dominant
CALM2	Calmodulin-2	114182	Long QT syndrome 15, 616249 (3), Autosomal dominant
CALR	Sicca syndrome antigen A (autoantigen Ro; calreticulin)	109091	Myelofibrosis, somatic, 254450 (3); Thrombocythemia, somatic, 187950 (3)
CAMK2A	Calcium/calmodulin-dependent protein kinase II-alpha	114078	?Mental retardation, autosomal recessive 63, 618095 (3), Autosomal recessive; Mental retardation, autosomal dominant 53, 617798 (3), Autosomal dominant
CAMK2B	Calcium/calmodulin-dependent protein kinase II-beta	607707	Mental retardation, autosomal dominant 54, 617799 (3), Autosomal dominant
CAMK2G	Calcium/calmodulin-dependent protein kinase (CaM kinase) II gamma	602123	Mental retardation, autosomal dominant 59, 618522 (3), Autosomal dominant
CAMTA1	Calmodulin-binding transcription activator 1	611501	Cerebellar ataxia, nonprogressive, with mental retardation, 614756 (3), Autosomal dominant
CANT1	Calcium-activated nucleotidase 1	613165	Desbuquois dysplasia 1, 251450 (3), Autosomal recessive; Epiphyseal dysplasia, multiple, 7, 617719 (3), Autosomal recessive
CAPN1	Calpain, large polypeptide L1	114220	Spastic paraplegia 76, autosomal recessive, 616907 (3), Autosomal recessive
CAPN10	Calpain-10	605286	{Diabetes mellitus, noninsulin-dependent 1}, 601283 (3)
CAPN3	Calpain, large polypeptide L3	114240	Muscular dystrophy, limb-girdle, autosomal recessive 1, 253600 (3), Autosomal recessive; Muscular dystrophy, limb-girdle, autosomal dominant 4, 618129 (3), Autosomal dominant
CAPN5	Calpain 5	602537	Vitreoretinopathy, neovascular inflammatory, 193235 (3), Autosomal dominant
CARD11	Caspase recruitment domain-containing protein 11	607210	Immunodeficiency 11B with atopic dermatitis, 617638 (3), Autosomal dominant; B-cell expansion with NFKB and T-cell anergy, 616452 (3), Autosomal dominant; Immunodeficiency 11A, 615206 (3), Autosomal recessive
CARD14	Caspase recruitment domain-containing protein 14	607211	Pityriasis rubra pilaris, 173200 (3), Autosomal dominant; Psoriasis 2, 602723 (3), Autosomal dominant
CARD9	Caspase recruitment domain-containing protein 9	607212	Candidiasis, familial, 2, autosomal recessive, 212050 (3), Autosomal recessive
CARMIL2	Capping protein regulator and myosin 1 linker 2	610859	Immunodeficiency 58, 618131 (3), Autosomal recessive
CARS2	Cysteinyl-tRNA synthetase 2	612800	Combined oxidative phosphorylation deficiency 27, 616672 (3), Autosomal recessive
CARTPT	Cocaine- and amphetamine-regulated transcript prepropeptide	602606	{?Obesity, susceptibility to}, 601665 (3), Autosomal recessive, Autosomal dominant, Multifactorial
CASK	Calcium/calmodulin-dependent serine protein kinase	300172	Mental retardation, with or without nystagmus, 300422 (3); Mental retardation and microcephaly with pontine and cerebellar hypoplasia, 300749 (3), X-linked dominant; FG syndrome 4, 300422 (3)
CASP10	Caspase 10, apoptosis-related cysteine protease	601762	Lymphoma, non-Hodgkin, somatic, 605027 (3); Gastric cancer, somatic, 613659 (3); Autoimmune lymphoproliferative syndrome, type II, 603909 (3), Autosomal dominant
CASP12	Caspase 12, apoptosis-related cysteine protease	608633	{Sepsis, susceptibility to} (3)
CASP14	Caspase 14, apoptosis-related cysteine protease	605848	Ichthyosis, congenital, autosomal recessive 12, 617320 (3), Autosomal recessive
CASP8	Caspase 8, apoptosis-related cysteine protease	601763	{Lung cancer, protection against}, 211980 (3), Autosomal dominant, Somatic mutation; ?Autoimmune lymphoproliferative syndrome, type IIB, 607271 (3), Autosomal recessive; Hepatocellular carcinoma, somatic, 114550 (3); {Breast cancer, protection against}, 114480 (3), Autosomal dominant, Somatic mutation
CASQ1	Calsequestrin, fast-twitch, skeletal muscle-1	114250	Myopathy, vacuolar, with CASQ1 aggregates, 616231 (3), Autosomal dominant
CASQ2	Calsequestrin, fast-twitch, skeletal muscle-2	114251	Ventricular tachycardia, catecholaminergic polymorphic, 2, 611938 (3), Autosomal recessive
CASR	Calcium-sensing receptor	601199	Hypocalcemia, autosomal dominant, with Bartter syndrome, 601198 (3), Autosomal dominant; Hypocalciuric hypercalcemia, type I, 145980 (3), Autosomal dominant; {Epilepsy idiopathic generalized, susceptibility to, 8}, 612899 (3); Hypocalcemia, autosomal dominant, 601198 (3), Autosomal dominant; Hyperparathyroidism, neonatal, 239200 (3), Autosomal recessive, Autosomal dominant
CAST	Calpastatin	114090	Peeling skin with leukonychia, acral punctate keratoses, cheilitis, and knuckle pads, 616295 (3), Autosomal recessive
CAT	Catalase	115500	Acatalasemia, 614097 (3)
CATSPER1	Cation channel, sperm-associated, 1	606389	Spermatogenic failure 7, 612997 (3), Autosomal recessive
CAV1	Caveolin-1	601047	Lipodystrophy, familial partial, type 7, 606721 (3), Autosomal dominant; ?Lipodystrophy, congenital generalized, type 3, 612526 (3), Autosomal recessive; Pulmonary hypertension, primary, 3, 615343 (3), Autosomal dominant
CAV3	Caveolin-3	601253	Creatine phosphokinase, elevated serum, 123320 (3), Autosomal dominant; Long QT syndrome 9, 611818 (3), Autosomal dominant; Myopathy, distal, Tateyama type, 614321 (3), Autosomal dominant; Rippling muscle disease 2, 606072 (3), Autosomal dominant; Cardiomyopathy, familial hypertrophic, 192600 (3), Digenic dominant, Autosomal dominant
CAVIN1	Caveolae-associated protein 1	603198	Lipodystrophy, congenital generalized, type 4, 613327 (3), Autosomal recessive
CBFB	Core-binding factor, beta subunit	121360	Myeloid leukemia, acute, M4/M4Eo subtype, somatic, 601626 (1)
CBL	Cas-Br-M ecotropic retroviral transforming sequence (Oncogene CBL2)	165360	Noonan syndrome-like disorder with or without juvenile myelomonocytic leukemia, 613563 (3), Autosomal dominant; ?Juvenile myelomonocytic leukemia, 607785 (3), Autosomal dominant, Somatic mutation
CBLIF	Gastric intrinsic factor	609342	Intrinsic factor deficiency, 261000 (3), Autosomal recessive
CBS	Cystathionine beta-synthase	613381	Homocystinuria, B6-responsive and nonresponsive types, 236200 (3), Autosomal recessive; Thrombosis, hyperhomocysteinemic, 236200 (3), Autosomal recessive
CBX2	Chromobox 2	602770	?46XY sex reversal 5, 613080 (3), Autosomal recessive
CC2D1A	Coiled-coil and C2 domain-containing 1A	610055	Mental retardation, autosomal recessive 3, 608443 (3), Autosomal recessive
CC2D2A	Coiled-coil and C2 domains-containing protein 2A	612013	Meckel syndrome 6, 612284 (3), Autosomal recessive; Joubert syndrome 9, 612285 (3), Autosomal recessive; COACH syndrome, 216360 (3), Autosomal recessive
CCBE1	Collagen and calcium-binding EGF domain-containing protein 1	612753	Hennekam lymphangiectasia-lymphedema syndrome 1, 235510 (3), Autosomal recessive
CCDC103	Coiled-coil domain-containing protein 103	614677	Ciliary dyskinesia, primary, 17, 614679 (3), Autosomal recessive
CCDC114	Coiled-coil domain-containing protein 114	615038	Ciliary dyskinesia, primary, 20, 615067 (3), Autosomal recessive
CCDC115	Coiled-coil domain-containing protein 115	613734	Congenital disorder of glycosylation, type IIo, 616828 (3), Autosomal recessive
CCDC151	Coiled-coil domain-containing protein 151	615956	Ciliary dyskinesia, primary, 30, 616037 (3), Autosomal recessive
CCDC174	Coiled-coil domain-containing protein 174	616735	Hypotonia, infantile, with psychomotor retardation, 616816 (3), Autosomal recessive
CCDC22	Coiled-coil domain-containing protein 22	300859	Ritscher-Schinzel syndrome 2, 300963 (3), X-linked recessive
CCDC28B	Coiled-coil domain-containing protein 28B	610162	{Bardet-Biedl syndrome 1, modifier of}, 209900 (3), Autosomal recessive, Digenic recessive
CCDC39	Coiled-coil domain-containing protein 39	613798	Ciliary dyskinesia, primary, 14, 613807 (3)
CCDC40	Coiled-coil domain-containing protein 40	613799	Ciliary dyskinesia, primary, 15, 613808 (3)
CCDC47	Coiled-coil domain-containing protein 47	618260	Trichohepatoneurodevelopmental syndrome, 618268 (3), Autosomal recessive
CCDC50	Coiled-coil domain-containing protein 50	611051	?Deafness, autosomal dominant 44, 607453 (3), Autosomal dominant
CCDC65	Coiled-coil domain-containing protein 65	611088	Ciliary dyskinesia, primary, 27, 615504 (3), Autosomal recessive
CCDC78	Coiled-coil domain-containing protein 78	614666	?Centronuclear myopathy 4, 614807 (3), Autosomal dominant
CCDC8	Coiled-coil domain-containing protein 8	614145	3-M syndrome 3, 614205 (3), Autosomal recessive
CCDC88A	Coiled-coil domain-containing protein 88A	609736	?PEHO syndrome-like, 617507 (3), Autosomal recessive
CCDC88C	Coiled-coil domain-containing protein 88C	611204	?Spinocerebellar ataxia 40, 616053 (3), Autosomal dominant; Hydrocephalus, congenital, 1, 236600 (3), Autosomal recessive
CCL11	Chemokine, C-C motif, ligand 11	601156	{HIV1, resistance to}, 609423 (3); {Asthma, susceptibility to}, 600807 (3), Autosomal dominant
CCL2	Small inducible cytokine A2 (monocyte chemotactic protein, homologous to mouse Sig-je)	158105	{HIV-1, resistance to}, 609423 (3); {Mycobacterium tuberculosis, susceptibility to}, 607948 (3); {Spina bifida, susceptibility to}, 182940 (3), Autosomal dominant; {Coronary artery disease, modifier of} (3)
CCL3	Chemokine, C-C motif, ligand 3	182283	{HIV infection, resistance to}, 609423 (2)
CCL3L1	Chemokine, C-C motif, ligand 3-like 1	601395	{HIV/AIDS, susceptibility to}, 609423 (3)
CCL5	Chemokine, C-C motif, ligand 5	187011	{HIV-1 disease, rapid progression of} (3); {HIV-1 disease, delayed progression of} (3)
CCM2	Malcavernin	607929	Cerebral cavernous malformations-2, 603284 (3), Autosomal dominant
CCN6	Wnt-1 inducible signaling pathway protein 3	603400	Spondyloepiphyseal dysplasia tarda with progressive arthropathy, 208230 (3), Autosomal recessive; Arthropathy, progressive pseudorheumatoid, of childhood, 208230 (3), Autosomal recessive
CCND1	Cyclin D1	168461	{Colorectal cancer, susceptibility to}, 114500 (3), Autosomal dominant, Somatic mutation; {von Hippel-Lindau syndrome, modifier of}, 193300 (3), Autosomal dominant; {Multiple myeloma, susceptibility to}, 254500 (3), Somatic mutation
CCND2	Cyclin D2	123833	Megalencephaly-polymicrogyria-polydactyly-hydrocephalus syndrome 3, 615938 (3), Autosomal dominant
CCNK	Cyclin K	603544	?Intellectual developmental disorder with hypertelorism and distinctive facies, 618147 (3), Autosomal dominant
CCNO	Cyclin O	607752	Ciliary dyskinesia, primary, 29, 615872 (3), Autosomal recessive
CCNQ	Family with sequence similarity 58, member A	300708	STAR syndrome, 300707 (3), X-linked dominant
CCR2	Chemokine (C-C) receptor 2	601267	{HIV infection, susceptibility/resistance to} (3)
CCR5	Chemokine (C-C) receptor 5	601373	{Diabetes mellitus, insulin-dependent, 22}, 612522 (3); {HIV infection, susceptibility/resistance to} (3); {Hepatitis C virus, resistance to}, 609532 (3); {West nile virus, susceptibility to}, 610379 (3)
CCT5	chaperonin containing TCP1, subunit 5 (epsilon)	610150	Neuropathy, hereditary sensory, with spastic paraplegia, 256840 (3), Autosomal recessive
CD151	CD151 antigen	602243	Nephropathy with pretibial epidermolysis bullosa and deafness, 609057 (3); [Blood group, Raph], 179620 (3)
CD164	CD164 antigen	603356	?Deafness, autosomal dominant 66, 616969 (3), Autosomal dominant
CD19	CD19 antigen	107265	Immunodeficiency, common variable, 3, 613493 (3), Autosomal recessive
CD207	CD207 antigen	604862	[?Birbeck granule deficiency], 613393 (3)
CD209	CD209 antigen	604672	{Mycobacterium tuberculosis, susceptibility to}, 607948 (3); {HIV type 1, susceptibility to}, 609423 (3); {Dengue fever, protection against}, 614371 (3)
CD244	CD244 antigen	605554	{Rheumatoid arthritis, susceptibility to}, 180300 (3)
CD247	CD247 antigen	186780	?Immunodeficiency 25, 610163 (3), Autosomal recessive
CD27	CD27 antigen	186711	Lymphoproliferative syndrome 2, 615122 (3), Autosomal recessive
CD2AP	CD2-associated protein	604241	Glomerulosclerosis, focal segmental, 3, 607832 (3)
CD320	CD320 molecule	606475	Methylmalonic aciduria, transient, due to transcobalamin receptor defect, 613646 (3)
CD36	CD36 antigen (collagen type I)	173510	{Coronary heart disease, susceptibility to, 7}, 610938 (3); {Malaria, cerebral, susceptibility to}, 611162 (3); Platelet glycoprotein IV deficiency, 608404 (3), Autosomal recessive; [Macrothrombocytopenia] (1); {Malaria, cerebral, reduced risk of}, 611162 (3)
CD3D	CD3D antigen, delta polypeptide (TiT3 complex)	186790	Immunodeficiency 19, 615617 (3), Autosomal recessive
CD3E	CD3E antigen, epsilon polypeptide (TiT3 complex)	186830	Immunodeficiency 18, SCID variant, 615615 (3), Autosomal recessive; Immunodeficiency 18, 615615 (3), Autosomal recessive
CD3G	CD3G antigen, gamma polypeptide (TiT3 complex)	186740	Immunodeficiency 17, CD3 gamma deficient, 615607 (3), Autosomal recessive
CD4	CD4 antigen (p55)	186940	OKT4 epitope deficiency, 613949 (3)
CD40	CD40 antigen	109535	Immunodeficiency with hyper-IgM, type 3, 606843 (3), Autosomal recessive
CD40LG	Tumor necrosis factor ligand superfamily, member 5	300386	Immunodeficiency, X-linked, with hyper-IgM, 308230 (3), X-linked recessive
CD44	CD44 antigen (homing function)	107269	[Blood group, Indian system], 609027 (3)
CD46	Membrane cofactor protein (CD46, trophoblast-lymphocyte cross-reactive antigen)	120920	{Hemolytic uremic syndrome, atypical, susceptibility to, 2}, 612922 (3), Autosomal recessive, Autosomal dominant
CD55	CD55 antigen (blood group Cromer)	125240	[Blood group Cromer], 613793 (3), Autosomal recessive; Complement hyperactivation, angiopathic thrombosis, and protein-losing enteropathy, 226300 (3), Autosomal recessive
CD59	CD59 antigen (p18-20)	107271	Hemolytic anemia, CD59-mediated, with or without immune-mediated polyneuropathy, 612300 (3), Autosomal recessive
CD70	Tumor necrosis factor ligand superfamily, member 7 (CD70 antigen)	602840	Lymphoproliferative syndrome 3, 618261 (3), Autosomal recessive
CD79A	CD79A antigen (immunoglobulin-associated alpha)	112205	Agammaglobulinemia 3, 613501 (3), Autosomal recessive
CD79B	CD79B antigen	147245	Agammaglobulinemia 6, 612692 (3), Autosomal recessive
CD81	CD81 antigen (target of antiproliferative antibody-1)	186845	Immunodeficiency, common variable, 6, 613496 (3), Autosomal recessive
CD8A	CD8 antigen, alpha polypeptide (p32)	186910	CD8 deficiency, familial, 608957 (3), Autosomal recessive
CD96	CD96 antigen	606037	C syndrome, 211750 (3), Autosomal dominant
CDAN1	Codanin 1	607465	Dyserythropoietic anemia, congenital, type Ia, 224120 (3), Autosomal recessive
CDC14A	Cell division cycle 14A	603504	Deafness, autosomal recessive 32, with or without immotile sperm, 608653 (3), Autosomal recessive
CDC42	Cell division cycle 42 (GTP-binding protein, 25kD)	116952	Takenouchi-Kosaki syndrome, 616737 (3), Autosomal dominant
CDC45	Cell division cycle 45, S. Cerevisiae, homolog-like	603465	Meier-Gorlin syndrome 7, 617063 (3), Autosomal recessive
CDC6	Cell division cycle 6	602627	?Meier-Gorlin syndrome 5, 613805 (3), Autosomal recessive
CDC73	Cell division cycle 73	607393	Parathyroid adenoma with cystic changes, 145001 (3), Autosomal dominant; Hyperparathyroidism-jaw tumor syndrome, 145001 (3), Autosomal dominant; Parathyroid carcinoma, 608266 (3); Hyperparathyroidism, familial primary, 145000 (3), Autosomal dominant
CDCA7	Cell division cycle-associated 7	609937	Immunodeficiency-centromeric instability-facial anomalies syndrome 3, 616910 (3), Autosomal recessive
CDH1	Cadherin-1 (E-cadherin; uvomorulin)	192090	Endometrial carcinoma, somatic, 608089 (3); {Prostate cancer, susceptibility to}, 176807 (3), Autosomal dominant, Somatic mutation; Blepharocheilodontic syndrome 1, 119580 (3), Autosomal dominant; Gastric cancer, hereditary diffuse, with or without cleft lip and/or palate, 137215 (3), Autosomal dominant; {Breast cancer, lobular}, 114480 (3), Autosomal dominant, Somatic mutation; Ovarian cancer, s…
CDH11	Cadherin-11 (OB-cadherin, osteoblast)	600023	Elsahy-Waters syndrome, 211380 (3), Autosomal recessive
CDH15	Cadherin-15, M-cadherin (myotubule)	114019	Mental retardation, autosomal dominant 3, 612580 (3)
CDH23	Cadherin-23 (otocadherin)	605516	{Pituitary adenoma 5, multiple types}, 617540 (3), Autosomal dominant; Deafness, autosomal recessive 12, 601386 (3), Autosomal recessive; Usher syndrome, type 1D/F digenic, 601067 (3), Autosomal recessive, Digenic recessive; Usher syndrome, type 1D, 601067 (3), Autosomal recessive, Digenic recessive
CDH3	Cadherin-3 (P-cadherin)	114021	Ectodermal dysplasia, ectrodactyly, and macular dystrophy, 225280 (3), Autosomal recessive; Hypotrichosis, congenital, with juvenile macular dystrophy, 601553 (3), Autosomal recessive
CDHR1	Cadherin-related family, member 1	609502	Cone-rod dystrophy 15, 613660 (3), Autosomal recessive; Retinitis pigmentosa 65, 613660 (3), Autosomal recessive
CDK10	Cyclin-dependent kinase 10	603464	Al Kaissi syndrome, 617694 (3), Autosomal recessive
CDK13	Cyclin-dependent kinase 13	603309	Congenital heart defects, dysmorphic facial features, and intellectual developmental disorder, 617360 (3), Autosomal dominant
CDK4	Cyclin-dependent kinase 4	123829	{Melanoma, cutaneous malignant, 3}, 609048 (3), Autosomal dominant
CDK5	Cyclin-dependent kinase 5	123831	?Lissencephaly 7 with cerebellar hypoplasia, 616342 (3), Autosomal recessive
CDK5RAP2	CDK5 regulatory subunit-associated protein 2	608201	Microcephaly 3, primary, autosomal recessive, 604804 (3), Autosomal recessive
CDK6	Cyclin-dependent kinase 6	603368	?Microcephaly 12, primary, autosomal recessive, 616080 (3), Autosomal recessive
CDKL5	Cyclin-dependent kinase-like 5 (serine/threonine protein kinase 9)	300203	Epileptic encephalopathy, early infantile, 2, 300672 (3), X-linked dominant
CDKN1B	Cyclin-dependent kinase inhibitor 1B (p27, Kip1)	600778	Multiple endocrine neoplasia, type IV, 610755 (3), Autosomal dominant
CDKN1C	Cyclin-dependent kinase inhibitor 1C (p57, Kip2)	600856	IMAGE syndrome, 614732 (3), Autosomal dominant; Beckwith-Wiedemann syndrome, 130650 (3), Autosomal dominant
CDKN2A	Cyclin-dependent kinase inhibitor 2A (p16, inhibits CDK4)	600160	{Melanoma and neural system tumor syndrome}, 155755 (3), Autosomal dominant; {Melanoma, cutaneous malignant, 2}, 155601 (3), Autosomal dominant; {Melanoma-pancreatic cancer syndrome}, 606719 (3), Autosomal dominant
CDON	Cell adhesion molecule-related/downregulated by oncogenes	608707	Holoprosencephaly 11, 614226 (3), Autosomal dominant
CDSN	Corneodesmosin	602593	Hypotrichosis 2, 146520 (3), Autosomal dominant; Peeling skin syndrome 1, 270300 (3), Autosomal recessive
CDT1	Chromatin licensing and DNA replication factor 1	605525	Meier-Gorlin syndrome 4, 613804 (3), Autosomal recessive
CEACAM16	Carcinoembryonic antigen-related cell adhesion molecule 16	614591	Deafness, autosomal recessive 113, 618410 (3), Autosomal recessive; Deafness, autosomal dominant 4B, 614614 (3), Autosomal dominant
CEBPA	CCAAT/enhancer-binding protein (C/EBP), alpha	116897	Leukemia, acute myeloid, somatic, 601626 (3); ?Leukemia, acute myeloid, 601626 (3), Autosomal dominant, Somatic mutation
CEBPE	CCAAT/enhancer-binding protein (C/EBP), epsilon	600749	Specific granule deficiency, 245480 (3), Autosomal recessive
CEL	Carboxyl-ester lipase (bile-salt stimulated lipase)	114840	Maturity-onset diabetes of the young, type VIII, 609812 (3), Autosomal dominant
CELA2A	Chymotrypsin-like elastase family, member 2A	609443	Abdominal obesity-metabolic syndrome 4, 618620 (3), Autosomal dominant
CENPE	Centromere autoantigen E, 312kD	117143	?Microcephaly 13, primary, autosomal recessive, 616051 (3), Autosomal recessive
CENPF	Centromere autoantigen F, 400kD	600236	Stromme syndrome, 243605 (3), Autosomal recessive
CENPJ	Centromeric protein J	609279	Microcephaly 6, primary, autosomal recessive, 608393 (3), Autosomal recessive; ?Seckel syndrome 4, 613676 (3), Autosomal recessive
CEP104	Centrosomal protein, 104kD	616690	Joubert syndrome 25, 616781 (3), Autosomal recessive
CEP120	Centrosomal protein, 120kD	613446	Joubert syndrome 31, 617761 (3), Autosomal recessive; Short-rib thoracic dysplasia 13 with or without polydactyly, 616300 (3), Autosomal recessive
CEP135	Centrosomal protein, 135kD	611423	Microcephaly 8, primary, autosomal recessive, 614673 (3), Autosomal recessive
CEP152	Centrosomal protein, 152kD	613529	Microcephaly 9, primary, autosomal recessive, 614852 (3), Autosomal recessive; Seckel syndrome 5, 613823 (3), Autosomal recessive
CEP164	Centrosomal protein, 164kD	614848	Nephronophthisis 15, 614845 (3), Autosomal recessive
CEP19	Centrosomal protein, 19kD	615586	Morbid obesity and spermatogenic failure, 615703 (3), Autosomal recessive
CEP250	Centrosomal protein, 250kD	609689	Cone-rod dystrophy and hearing loss 2, 618358 (3), Autosomal recessive
CEP290	Centrosomal protein, 290kD	610142	?Bardet-Biedl syndrome 14, 615991 (3), Autosomal recessive; Leber congenital amaurosis 10, 611755 (3); Senior-Loken syndrome 6, 610189 (3), Autosomal recessive; Meckel syndrome 4, 611134 (3), Autosomal recessive; Joubert syndrome 5, 610188 (3), Autosomal recessive
CEP41	Centrosomal protein, 41kD	610523	Joubert syndrome 15, 614464 (3), Autosomal recessive
CEP55	Centrosomal protein, 55kD	610000	Multinucleated neurons, anhydramnios, renal dysplasia, cerebellar hypoplasia, and hydranencephaly, 236500 (3), Autosomal recessive
CEP57	Centrosomal protein 57kD	607951	Mosaic variegated aneuploidy syndrome 2, 614114 (3), Autosomal recessive
CEP63	Centrosomal protein, 63kD	614724	?Seckel syndrome 6, 614728 (3), Autosomal recessive
CEP78	Centrosomal protein, 78kD	617110	Cone-rod dystrophy and hearing loss, 617236 (3), Autosomal recessive
CEP83	Centrosomal protein, 83kD	615847	Nephronophthisis 18, 615862 (3), Autosomal recessive
CERKL	Ceramide kinase-like	608381	Retinitis pigmentosa 26, 608380 (3)
CERS1	Ceramide synthase 1	606919	?Epilepsy, progressive myoclonic, 8, 616230 (3), Autosomal recessive
CERS3	Ceramide synthase 3	615276	Ichthyosis, congenital, autosomal recessive 9, 615023 (3), Autosomal recessive
CERT1	COL4A3-binding protein (ceramide transporter)	604677	Mental retardation, autosomal dominant 34, 616351 (3), Autosomal dominant
CES1	Carboxylesterase 1 (monocyte/macrophage serine esterase 1)	114835	Drug metabolism, altered, CES1-related, 618057 (3)
CETP	Cholesteryl ester transfer protein, plasma	118470	[High density lipoprotein cholesterol level QTL 10], 143470 (3), Autosomal dominant; Hyperalphalipoproteinemia, 143470 (3), Autosomal dominant
CFAP298	Chromosome 21 open reading frame 59	615494	Ciliary dyskinesia, primary, 26, 615500 (3), Autosomal recessive
CFAP300	Cilia- and flagella-associated protein 300	618058	Ciliary dyskinesia, primary, 38, 618063 (3), Autosomal recessive
CFAP410	Cilia and flagella-associated protein 410	603191	Spondylometaphyseal dysplasia, axial, 602271 (3), Autosomal recessive; Retinal dystrophy with macular staphyloma, 617547 (3), Autosomal recessive
CFAP43	Cilia- and flagella-associated protein 43	617558	Spermatogenic failure 19, 617592 (3), Autosomal recessive
CFAP44	Cilia- and flagella-associated protein 44	617559	?Spermatogenic failure 20, 617593 (3), Autosomal recessive
CFAP53	Coiled-coil domain-containing protein 11	614759	Heterotaxy, visceral, 6, autosomal recessive, 614779 (3), Autosomal recessive
CFAP65	Cilia- and flagella-associated protein 65	614270	Spermatogenic failure 40, 618664 (3), Autosomal recessive
CFAP69	Cilia- and flagella-associated protein 69	617949	Spermatogenic failure 24, 617959 (3), Autosomal recessive
CFAP70	Cilia- and flagella-associated protein 70	618661	?Spermatogenic failure 41, 618670 (3), Autosomal recessive
CFB	Complement factor B	138470	?Complement factor B deficiency, 615561 (3); {Macular degeneration, age-related, 14, reduced risk of}, 615489 (3); {Hemolytic uremic syndrome, atypical, susceptibility to, 4}, 612924 (3), Autosomal dominant
CFC1	Cryptic protein	605194	Heterotaxy, visceral, 2, autosomal, 605376 (3), Autosomal dominant
CFD	Complement factor D	134350	Complement factor D deficiency, 613912 (3), Autosomal recessive
CFH	Complement factor H	134370	Complement factor H deficiency, 609814 (3), Autosomal recessive, Autosomal dominant; {Hemolytic uremic syndrome, atypical, susceptibility to, 1}, 235400 (3), Autosomal recessive, Autosomal dominant; Basal laminar drusen, 126700 (3), Autosomal dominant; {Macular degeneration, age-related, 4}, 610698 (3)
CFHR1	Complement factor H-related 1	134371	{Hemolytic uremic syndrome, atypical, susceptibility to}, 235400 (3), Autosomal recessive, Autosomal dominant; {Macular degeneration, age-related, reduced risk of}, 603075 (3), Autosomal dominant
CFHR3	Complement factor H-related 3	605336	{Macular degeneration, age-related, reduced risk of}, 603075 (3), Autosomal dominant; {Hemolytic uremic syndrome, atypical, susceptibility to}, 235400 (3), Autosomal recessive, Autosomal dominant
CFHR5	Complement factor H-related 5	608593	Nephropathy due to CFHR5 deficiency, 614809 (3), Autosomal dominant
CFI	Complement factor I	217030	{Hemolytic uremic syndrome, atypical, susceptibility to, 3}, 612923 (3), Autosomal dominant; Complement factor I deficiency, 610984 (3), Autosomal recessive; {Macular degeneration, age-related, 13, susceptibility to}, 615439 (3), Autosomal dominant
CFL2	Cofilin 2, muscle	601443	Nemaline myopathy 7, autosomal recessive, 610687 (3), Autosomal recessive
CFP	Properdin P factor, complement	300383	Properdin deficiency, X-linked, 312060 (3), X-linked recessive
CFTR	Cystic fibrosis transmembrane conductance regulator (ATP-binding cassette, subfamily C, member 7)	602421	{Bronchiectasis with or without elevated sweat chloride 1, modifier of}, 211400 (3), Autosomal dominant; Sweat chloride elevation without CF (3); {Hypertrypsinemia, neonatal} (3); Cystic fibrosis, 219700 (3), Autosomal recessive; Congenital bilateral absence of vas deferens, 277180 (3), Autosomal recessive; {Pancreatitis, hereditary}, 167800 (3), Autosomal dominant
CHAMP1	Chromosome alignment-maintaining phosphoprotein 1	616327	Mental retardation, autosomal dominant 40, 616579 (3), Autosomal dominant
CHAT	Choline acetyltransferase	118490	Myasthenic syndrome, congenital, 6, presynaptic, 254210 (3), Autosomal recessive
CHCHD10	Coiled-coil-helix-coiled-coil-helix domain-containing protein 10	615903	Spinal muscular atrophy, Jokela type, 615048 (3), Autosomal dominant; Frontotemporal dementia and/or amyotrophic lateral sclerosis 2, 615911 (3), Autosomal dominant; ?Myopathy, isolated mitochondrial, autosomal dominant, 616209 (3), Autosomal dominant
CHCHD2	Coiled-coil-helix-coiled-coil-helix domain-containing protein 2	616244	Parkinson disease 22, autosomal dominant, 616710 (3), Autosomal dominant
CHD1	Chromodomain helicase DNA binding protein-1	602118	Pilarowski-Bjornsson syndrome, 617682 (3), Autosomal dominant
CHD2	Chromodomain helicase DNA binding protein-2	602119	Epileptic encephalopathy, childhood-onset, 615369 (3), Autosomal dominant
CHD3	Chromodomain helicase DNA binding protein-3	602120	Snijders Blok-Campeau syndrome, 618205 (3), Autosomal dominant
CHD4	Chromodomain helicase DNA-binding protein-4	603277	Sifrim-Hitz-Weiss syndrome, 617159 (3), Autosomal dominant
CHD7	Chromodomain helicase DNA binding protein 7	608892	Hypogonadotropic hypogonadism 5 with or without anosmia, 612370 (3), Autosomal dominant; CHARGE syndrome, 214800 (3), Autosomal dominant
CHD8	Chromodomain helicase DNA-binding protein 8	610528	{Autism, susceptibility to, 18}, 615032 (3), Autosomal dominant
CHEK2	Checkpoint kinase 2	604373	Li-Fraumeni syndrome, 609265 (3); Osteosarcoma, somatic, 259500 (3); {Prostate cancer, familial, susceptibility to}, 176807 (3), Autosomal dominant, Somatic mutation; {Breast cancer, susceptibility to}, 114480 (3), Autosomal dominant, Somatic mutation; {Breast and colorectal cancer, susceptibility to} (3)
CHI3L1	Chitinase 3-like 1 (cartilage glycoprotein-39)	601525	{Schizophrenia, susceptibility to}, 181500 (3), Autosomal dominant; {Asthma-related traits, susceptibility to, 7}, 611960 (3)
CHIC2	Cysteine-rich hydrophobic domain 2 (Brx-like gene translocated in leukemia)	604332	{Leukemia, acute myeloid}, 601626 (3), Autosomal dominant, Somatic mutation
CHIT1	Chitotriosidase	600031	[Chitotriosidase deficiency], 614122 (3), Autosomal recessive
CHKB	Choline kinase, beta	612395	Muscular dystrophy, congenital, megaconial type, 602541 (3), Autosomal recessive
CHM	Rab escort protein 1	300390	Choroideremia, 303100 (3), X-linked dominant
CHMP1A	CHMP family, member 1A	164010	Pontocerebellar hypoplasia, type 8, 614961 (3), Autosomal recessive
CHMP2B	CHMP family, member 2B	609512	Amyotrophic lateral sclerosis 17, 614696 (3), Autosomal dominant; Dementia, familial, nonspecific, 600795 (3), Autosomal dominant
CHMP4B	CHMP family, member 4B	610897	Cataract 31, multiple types, 605387 (3), Autosomal dominant
CHN1	Chimerin 1 (GTPase-activating protein, rho, 2)	118423	Duane retraction syndrome 2, 604356 (3)
CHP1	Calcineurin like EF-hand protein 1	606988	?Spastic ataxia 9, autosomal recessive, 618438 (3), Autosomal recessive
CHRDL1	Chordin-like 1	300350	Megalocornea 1, X-linked, 309300 (3), X-linked recessive
CHRM3	Cholinergic receptor, muscarinic, 3	118494	?Prune belly syndrome, 100100 (3), Autosomal recessive
CHRNA1	Cholinergic receptor, nicotinic, alpha polypeptide-1, muscle	100690	Myasthenic syndrome, congenital, 1A, slow-channel, 601462 (3), Autosomal dominant; Myasthenic syndrome, congenital, 1B, fast-channel, 608930 (3), Autosomal recessive, Autosomal dominant; Multiple pterygium syndrome, lethal type, 253290 (3), Autosomal recessive
CHRNA2	Cholinergic receptor, nicotinic, alpha polypeptide-2	118502	Epilepsy, nocturnal frontal lobe, type 4, 610353 (3), Autosomal dominant
CHRNA3	Cholinergic receptor, neuronal nicotinic, alpha polypeptide-3	118503	{Lung cancer susceptibility 2}, 612052 (3)
CHRNA4	Cholinergic receptor, nicotinic, alpha polypeptide-4	118504	Epilepsy, nocturnal frontal lobe, 1, 600513 (3), Autosomal dominant; {Nicotine addiction, susceptibility to}, 188890 (3)
CHRNA5	Cholinergic receptor, neuronal nicotinic, alpha polypeptide-5	118505	{Lung cancer susceptibility 2}, 612052 (3); {Nicotine dependence, susceptibility to}, 612052 (3)
CHRNB1	Cholinergic receptor, nicotinic, beta polypeptide-1, muscle	100710	?Myasthenic syndrome, congenital, 2C, associated with acetylcholine receptor deficiency, 616314 (3), Autosomal recessive; Myasthenic syndrome, congenital, 2A, slow-channel, 616313 (3), Autosomal dominant
CHRNB2	Cholinergic receptor, nicotinic, beta polypeptide-2	118507	Epilepsy, nocturnal frontal lobe, 3, 605375 (3)
CHRND	Cholinergic receptor, nicotinic, delta polypeptide	100720	?Myasthenic syndrome, congenital, 3C, associated with acetylcholine receptor deficiency, 616323 (3), Autosomal recessive; ?Myasthenic syndrome, congenital, 3A, slow-channel, 616321 (3), Autosomal dominant; Myasthenic syndrome, congenital, 3B, fast-channel, 616322 (3), Autosomal recessive; Multiple pterygium syndrome, lethal type, 253290 (3), Autosomal recessive
CHRNE	Cholinergic receptor, nicotinic, epsilon polypeptide	100725	Myasthenic syndrome, congenital, 4A, slow-channel, 605809 (3), Autosomal recessive, Autosomal dominant; Myasthenic syndrome, congenital, 4C, associated with acetylcholine receptor deficiency, 608931 (3), Autosomal recessive; Myasthenic syndrome, congenital, 4B, fast-channel, 616324 (3), Autosomal recessive
CHRNG	Cholinergic receptor, nicotinic, gamma polypeptide	100730	Escobar syndrome, 265000 (3), Autosomal recessive; Multiple pterygium syndrome, lethal type, 253290 (3), Autosomal recessive
CHST11	Carbohydrate sulfotransferase 11	610128	?Osteochondrodysplasia, brachydactyly, and overlapping malformed digits, 618167 (3), Autosomal recessive
CHST14	Carbohydrate (N-acetylgalactosamine 4-0) sulfotransferase 14	608429	Ehlers-Danlos syndrome, musculocontractural type 1, 601776 (3), Autosomal recessive
CHST3	Carbohydrate sulfotransferase 3	603799	Spondyloepiphyseal dysplasia with congenital joint dislocations, 143095 (3), Autosomal recessive
CHST6	Carbohydrate sulfotransferase-6 (GlcNAc-6-sulfotransferase, corneal)	605294	Macular corneal dystrophy, 217800 (3), Autosomal recessive
CHST8	Carbohydrate sulfotransferase 8	610190	?Peeling skin syndrome 3, 616265 (3), Autosomal recessive
CHSY1	Carbohydrate synthase 1	608183	Temtamy preaxial brachydactyly syndrome, 605282 (3), Autosomal recessive
CHUK	Conserved helix-loop-helix ubiquitous kinase	600664	Cocoon syndrome, 613630 (3)
CIB1	Calcium- and integrin-binding protein 1	602293	Epidermodysplasia verruciformis 3, 618267 (3), Autosomal recessive
CIB2	Calcium- and integrin-binding protein 2	605564	Deafness, autosomal recessive 48, 609439 (3), Autosomal recessive; Usher syndrome, type IJ, 614869 (3), Autosomal recessive
CIC	Capicua transcriptional repressor	612082	Mental retardation, autosomal dominant 45, 617600 (3), Autosomal dominant
CIDEC	Cell death-inducing DFFA-like effector C	612120	?Lipodystrophy, familial partial, type 5, 615238 (3), Autosomal recessive
CIITA	Class II major histocompatibility complex transactivator	600005	Bare lymphocyte syndrome, type II, complementation group A, 209920 (3), Autosomal recessive; {Rheumatoid arthritis, susceptibility to}, 180300 (3)
CILK1	Intestinal cell kinase	612325	Endocrine-cerebroosteodysplasia, 612651 (3), Autosomal recessive; {Epilepsy, juvenile myoclonic, susceptibility to, 10}, 617924 (3), Autosomal dominant
CILP	Cartilage intermediate layer protein	603489	{Lumbar disc disease, susceptibility to}, 603932 (3)
CISD2	CDGSH iron sulfur domain protein 2	611507	Wolfram syndrome 2, 604928 (3), Autosomal recessive
CISH	Cytokine inducible SH2-containing protein	602441	{Malaria, susceptibility to}, 611162 (3); {Tuberculosis, susceptibility to}, 607948 (3); {Bacteremia, susceptibility to}, 614383 (3)
CIT	Citron rho-interacting serine/threonine kinase	605629	Microcephaly 17, primary, autosomal recessive, 617090 (3), Autosomal recessive
CITED2	CBP/p300-interacting transactivator, with glu/asp-rich C-terminal domain, 2	602937	Atrial septal defect 8, 614433 (3), Autosomal dominant; Ventricular septal defect 2, 614431 (3), Autosomal dominant
CKAP2L	Cytoskeleton-associated protein 2-like	616174	Filippi syndrome, 272440 (3), Autosomal recessive
CLCF1	Cardiotrophin-like cytokine	607672	Cold-induced sweating syndrome 2, 610313 (3), Autosomal recessive
CLCN1	Chloride channel-1, skeletal muscle	118425	Myotonia congenita, dominant, 160800 (3), Autosomal dominant; Myotonia levior, recessive (3); Myotonia congenita, recessive, 255700 (3), Autosomal recessive
CLCN2	Chloride channel-2	600570	{Epilepsy, juvenile absence, susceptibility to, 2}, 607628 (3), Autosomal dominant; {Epilepsy, idiopathic generalized, susceptibility to, 11}, 607628 (3), Autosomal dominant; {Epilepsy, juvenile myoclonic, susceptibility to, 8}, 607628 (3), Autosomal dominant; Leukoencephalopathy with ataxia, 615651 (3), Autosomal recessive; Hyperaldosteronism, familial, type II, 605635 (3), Autosomal dominant
CLCN4	Chloride channel-4	302910	Raynaud-Claes syndrome, 300114 (3), X-linked dominant
CLCN5	Chloride channel-5	300008	Proteinuria, low molecular weight, with hypercalciuric nephrocalcinosis, 308990 (3), X-linked recessive; Dent disease, 300009 (3), X-linked recessive; Hypophosphatemic rickets, 300554 (3), X-linked recessive; Nephrolithiasis, type I, 310468 (3), X-linked recessive
CLCN7	Chloride channel-7	602727	Osteopetrosis, autosomal recessive 4, 611490 (3), Autosomal recessive; Osteopetrosis, autosomal dominant 2, 166600 (3), Autosomal dominant; Hypopigmentation, organomegaly, and delayed myelination and development, 618541 (3), Autosomal dominant
CLCNKA	Chloride channel, kidney, A	602024	Bartter syndrome, type 4b, digenic, 613090 (3), Digenic recessive
CLCNKB	Chloride channel, kidney, B	602023	Bartter syndrome, type 3, 607364 (3), Autosomal recessive; Bartter syndrome, type 4b, digenic, 613090 (3), Digenic recessive
CLDN1	Claudin 1	603718	Ichthyosis, leukocyte vacuoles, alopecia, and sclerosing cholangitis, 607626 (3), Autosomal recessive
CLDN10	Claudin 10	617579	HELIX syndrome, 617671 (3), Autosomal recessive
CLDN14	Claudin 14	605608	Deafness, autosomal recessive 29, 614035 (3), Autosomal recessive
CLDN16	Claudin 16 (paracellin 1)	603959	Hypomagnesemia 3, renal, 248250 (3), Autosomal recessive
CLDN19	Claudin 19	610036	Hypomagnesemia 5, renal, with ocular involvement, 248190 (3), Autosomal recessive
CLEC1A	C-type lectin domain family 1, member A	606782	{Aspergillosis, susceptibility to}, 614079 (3)
CLEC4M	C-type lectin domain family 4, member M	605872	SARS infection, protection against, 605872 (2)
CLEC7A	C-type lectin domain family 7, member A	606264	{Aspergillosis, susceptibility to}, 614079 (3); Candidiasis, familial, 4, autosomal recessive, 613108 (3), Autosomal recessive
CLIC2	Chloride intracellular channel 2	300138	?Mental retardation, X-linked, syndromic 32, 300886 (3), X-linked recessive
CLIC5	Chloride intracellular channel 5	607293	?Deafness, autosomal recessive 103, 616042 (3), Autosomal recessive
CLMP	Coxsackievirus- and adenovirus receptor-like membrane protein	611693	Congenital short bowel syndrome, 615237 (3), Autosomal recessive
CLN3	Battenin	607042	Ceroid lipofuscinosis, neuronal, 3, 204200 (3), Autosomal recessive
CLN5	CLN5 gene	608102	Ceroid lipofuscinosis, neuronal, 5, 256731 (3), Autosomal recessive
CLN6	CLN6 gene	606725	Ceroid lipofuscinosis, neuronal, Kufs type, adult onset, 204300 (3), Autosomal recessive; Ceroid lipofuscinosis, neuronal, 6, 601780 (3), Autosomal recessive
CLN8	CLN8 gene	607837	Ceroid lipofuscinosis, neuronal, 8, 600143 (3), Autosomal recessive; Ceroid lipofuscinosis, neuronal, 8, Northern epilepsy variant, 610003 (3), Autosomal recessive
CLP1	Cleavage and polyadenylation factor I subunit 1, yeast, homolog of	608757	Pontocerebellar hypoplasia, type 10, 615803 (3), Autosomal recessive
CLPB	Caseinolytic peptidase B	616254	3-methylglutaconic aciduria, type VII, with cataracts, neurologic involvement and neutropenia, 616271 (3), Autosomal recessive
CLPP	ATP-dependent protease ClpAP, E. coli, proteolytic subunit, homolog of	601119	Perrault syndrome 3, 614129 (3), Autosomal recessive
CLPX	Caseinolytic mitochondrial matrix peptidase chaperone subunit	615611	?Protoporphyria, erythropoietic, 2, 618015 (3), Autosomal dominant
CLRN1	Clarin 1	606397	Retinitis pigmentosa 61, 614180 (3); Usher syndrome, type 3A, 276902 (3), Autosomal recessive
CLTC	Clathrin, heavy polypeptide (Hc)	118955	Mental retardation, autosomal dominant 56, 617854 (3), Autosomal dominant
CNBP	CCHC-type zinc finger nucleic acid-binding protein	116955	Myotonic dystrophy 2, 602668 (3), Autosomal dominant
CNGA1	Cyclic nucleotide gated channel, alpha 1	123825	Retinitis pigmentosa 49, 613756 (3)
CNGA3	Cyclic nucleotide-gated channel, alpha-3	600053	Achromatopsia 2, 216900 (3), Autosomal recessive
CNGB1	Cyclic nucleotide gated channel, beta 1	600724	Retinitis pigmentosa 45, 613767 (3), Autosomal recessive
CNGB3	Cyclic nucleotide-gated channel, beta-3	605080	Macular degeneration, juvenile, 248200 (3), Autosomal recessive; Achromatopsia 3, 262300 (3), Autosomal recessive
CNKSR2	connector enhancer of KSR 2	300724	Mental retardation, X-linked, syndromic, Houge type, 301008 (3), X-linked
CNNM2	Cyclin M2	607803	Hypomagnesemia 6, renal, 613882 (3), Autosomal dominant; Hypomagnesemia, seizures, and mental retardation, 616418 (3), Autosomal recessive, Autosomal dominant
CNNM4	Cyclin M4	607805	Jalili syndrome, 217080 (3), Autosomal recessive
CNOT1	CCR4-NOT transcription complex, subunit 1	604917	Holoprosencephaly 12, with or without pancreatic agenesis, 618500 (3), Autosomal dominant
CNOT2	CCR4-NOT transcription complex, subunit 2	604909	Intellectual developmental disorder with nasal speech, dysmorphic facies, and variable skeletal anomalies, 618608 (3), Autosomal dominant
CNOT3	CCR4-NOT transcription complex, subunit 3	604910	Intellectual developmental disorder with speech delay, autism, and dysmorphic facies, 618672 (3), Autosomal dominant
CNPY3	Canopy 3, zebrafish, homolog of	610774	Epileptic encephalopathy, early infantile, 60, 617929 (3), Autosomal recessive
CNTN1	Contactin 1	600016	?Myopathy, congenital, Compton-North, 612540 (3), Autosomal recessive
CNTN2	Contactin 2 (transiently-expressed axonal glycoprotein)	190197	?Epilepsy, myoclonic, familial adult, 5, 615400 (3), Autosomal recessive
CNTNAP1	Contactin-associated protein 1	602346	Lethal congenital contracture syndrome 7, 616286 (3), Autosomal recessive; Hypomyelinating neuropathy, congenital, 3, 618186 (3), Autosomal recessive
CNTNAP2	Contactin-associated protein-like 2	604569	{Autism susceptibility 15}, 612100 (3); Pitt-Hopkins like syndrome 1, 610042 (3), Autosomal recessive; Cortical dysplasia-focal epilepsy syndrome, 610042 (3), Autosomal recessive
COA5	Cytochrome c oxidase assembly factor 5	613920	?Cardioencephalomyopathy, fatal infantile, due to cytochrome c oxidase deficiency 3, 616500 (3), Autosomal recessive
COA6	Cytochrome c oxidase assembly factor 6	614772	Cardioencephalomyopathy, fatal infantile, due to cytochrome c oxidase deficiency 4, 616501 (3), Autosomal recessive
COA7	Cytochrome C oxidase assembly factor	615623	Spinocerebellar ataxia, autosomal recessive, with axonal neuropathy 3, 618387 (3), Autosomal recessive
COA8	Apoptogenic protein 1, mitochondrial	616003	Mitochondrial complex IV deficiency, 220110 (3), Autosomal recessive, Mitochondrial
COASY	Coenzyme A synthase	609855	Neurodegeneration with brain iron accumulation 6, 615643 (3), Autosomal recessive; Pontocerebellar hypoplasia, type 12, 618266 (3), Autosomal recessive
COCH	Cochlin	603196	?Deafness, autosomal recessive 110, 618094 (3), Autosomal recessive; Deafness, autosomal dominant 9, 601369 (3), Autosomal dominant
COG1	Component of oligomeric golgi complex 1	606973	Congenital disorder of glycosylation, type IIg, 611209 (3), Autosomal recessive
COG2	Component of oligomeric golgi complex 2	606974	?Congenital disorder of glycosylation, type IIq, 617395 (3), Autosomal recessive
COG4	Component of oligomeric golgi complex 4	606976	Saul-Wilson syndrome, 618150 (3), Autosomal dominant; Congenital disorder of glycosylation, type IIj, 613489 (3), Autosomal recessive
COG5	Component of oligomeric golgi complex 5	606821	Congenital disorder of glycosylation, type IIi, 613612 (3)
COG6	Component of oligomeric golgi complex 6	606977	Congenital disorder of glycosylation, type IIl, 614576 (3), Autosomal recessive; Shaheen syndrome, 615328 (3), Autosomal recessive
COG7	Component of oligomeric golgi complex 7	606978	Congenital disorder of glycosylation, type IIe, 608779 (3), Autosomal recessive
COG8	Component of oligomeric golgi complex 8	606979	Congenital disorder of glycosylation, type IIh, 611182 (3)
COL10A1	Collagen X, alpha-1 polypeptide	120110	Metaphyseal chondrodysplasia, Schmid type, 156500 (3), Autosomal dominant
COL11A1	Collagen XI, alpha-1 polypeptide	120280	Stickler syndrome, type II, 604841 (3), Autosomal dominant; Marshall syndrome, 154780 (3), Autosomal dominant; ?Deafness, autosomal dominant 37, 618533 (3); {Lumbar disc herniation, susceptibility to}, 603932 (3); Fibrochondrogenesis 1, 228520 (3), Autosomal recessive
COL11A2	Collagen XI, alpha-2 polypeptide	120290	Deafness, autosomal dominant 13, 601868 (3), Autosomal dominant; Otospondylomegaepiphyseal dysplasia, autosomal recessive, 215150 (3), Autosomal recessive; Fibrochondrogenesis 2, 614524 (3), Autosomal recessive, Autosomal dominant; Deafness, autosomal recessive 53, 609706 (3), Autosomal recessive; Otospondylomegaepiphyseal dysplasia, autosomal dominant, 184840 (3), Autosomal dominant
COL12A1	Collagen, type XII, alpha-1	120320	Bethlem myopathy 2, 616471 (3), Autosomal dominant; ?Ullrich congenital muscular dystrophy 2, 616470 (3)
COL13A1	Collagen XIII, alpha-1 polypeptide	120350	Myasthenic syndrome, congenital, 19, 616720 (3), Autosomal recessive
COL17A1	Collagen XVII, alpha-1 polypeptide	113811	Epithelial recurrent erosion dystrophy, 122400 (3), Autosomal dominant; Epidermolysis bullosa, junctional, non-Herlitz type, 226650 (3), Autosomal recessive; Epidermolysis bullosa, junctional, localisata variant, 226650 (3), Autosomal recessive
COL18A1	Collagen XVIII, alpha-1 polypeptide	120328	Knobloch syndrome, type 1, 267750 (3), Autosomal recessive
COL1A1	Collagen I, alpha-1 polypeptide	120150	Osteogenesis imperfecta, type I, 166200 (3), Autosomal dominant; Osteogenesis imperfecta, type IV, 166220 (3), Autosomal dominant; Osteogenesis imperfecta, type II, 166210 (3), Autosomal dominant; {Bone mineral density variation QTL, osteoporosis}, 166710 (3), Autosomal dominant; Caffey disease, 114000 (3), Autosomal dominant; Ehlers-Danlos syndrome, arthrochalasia type, 1, 130060 (3), Autosomal …
COL1A2	Collagen I, alpha-2 polypeptide	120160	{Osteoporosis, postmenopausal}, 166710 (3), Autosomal dominant; Ehlers-Danlos syndrome, cardiac valvular type, 225320 (3), Autosomal recessive; Ehlers-Danlos syndrome, arthrochalasia type, 2, 617821 (3), Autosomal dominant; Osteogenesis imperfecta, type II, 166210 (3), Autosomal dominant; Osteogenesis imperfecta, type IV, 166220 (3), Autosomal dominant; Osteogenesis imperfecta, type III, 259420 (…
COL25A1	Collagen, type XXV, alpha-1 polypeptide	610004	Fibrosis of extraocular muscles, congenital, 5, 616219 (3), Autosomal recessive
COL27A1	Collagen, type XXVII, alpha-1	608461	Steel syndrome, 615155 (3), Autosomal recessive
COL2A1	Collagen II, alpha-1 polypeptide	120140	Vitreoretinopathy with phalangeal epiphyseal dysplasia (3); Achondrogenesis, type II or hypochondrogenesis, 200610 (3), Autosomal dominant; Spondyloperipheral dysplasia, 271700 (3), Autosomal dominant; Kniest dysplasia, 156550 (3), Autosomal dominant; Stickler syndrome, type I, 108300 (3), Autosomal dominant; Epiphyseal dysplasia, multiple, with myopia and deafness, 132450 (3), Autosomal dominant…
COL3A1	Collagen III, alpha-1 polypeptide	120180	Ehlers-Danlos syndrome, vascular type, 130050 (3), Autosomal dominant; Polymicrogyria with or without vascular-type EDS, 618343 (3), Autosomal recessive
COL4A1	Collagen IV, alpha-1 polypeptide	120130	Angiopathy, hereditary, with nephropathy, aneurysms, and muscle cramps, 611773 (3), Autosomal dominant; Brain small vessel disease with or without ocular anomalies, 175780 (3), Autosomal dominant; {Hemorrhage, intracerebral, susceptibility to}, 614519 (3); ?Retinal arteries, tortuosity of, 180000 (3), Autosomal dominant; Microangiopathy and leukoencephalopathy, pontine, autosomal dominant, 618564…
COL4A2	Collagen IV, alpha-2 polypeptide	120090	Brain small vessel disease 2, 614483 (3), Autosomal dominant; {Hemorrhage, intracerebral, susceptibility to}, 614519 (3)
COL4A3	Collagen IV, alpha-3 polypeptide (Goodpasture antigen)	120070	Alport syndrome 2, autosomal recessive, 203780 (3), Autosomal recessive; Alport syndrome 3, autosomal dominant, 104200 (3), Autosomal dominant; Hematuria, benign familial, 141200 (3), Autosomal dominant
COL4A4	Collagen IV, alpha-4 polypeptide	120131	Alport syndrome 2, autosomal recessive, 203780 (3), Autosomal recessive; Hematuria, familial benign, 141200 (3), Autosomal dominant
COL4A5	Collagen IV, alpha-5 polypeptide	303630	Alport syndrome 1, X-linked, 301050 (3), X-linked dominant
COL4A6	Collagen IV, alpha-6 polypeptide	303631	?Deafness, X-linked 6, 300914 (3), X-linked recessive
COL5A1	Collagen V, alpha-1 polypeptide	120215	Ehlers-Danlos syndrome, classic type, 1, 130000 (3), Autosomal dominant
COL5A2	Collagen V, alpha-2 polypeptide	120190	Ehlers-Danlos syndrome, classic type, 2, 130010 (3), Autosomal dominant
COL6A1	Collagen VI, alpha-1 polypeptide	120220	Ullrich congenital muscular dystrophy 1, 254090 (3), Autosomal recessive, Autosomal dominant; Bethlem myopathy 1, 158810 (3), Autosomal recessive, Autosomal dominant
COL6A2	Collagen VI, alpha-2 polypeptide	120240	Bethlem myopathy 1, 158810 (3), Autosomal recessive, Autosomal dominant; Ullrich congenital muscular dystrophy 1, 254090 (3), Autosomal recessive, Autosomal dominant; ?Myosclerosis, congenital, 255600 (3), Autosomal recessive
COL6A3	Collagen VI, alpha-3 polypeptide	120250	Bethlem myopathy 1, 158810 (3), Autosomal recessive, Autosomal dominant; Dystonia 27, 616411 (3), Autosomal recessive; Ullrich congenital muscular dystrophy 1, 254090 (3), Autosomal recessive, Autosomal dominant
COL7A1	Collagen VII, alpha-1 polypeptide	120120	EBD inversa, 226600 (3), Autosomal recessive; Epidermolysis bullosa dystrophica, AR, 226600 (3), Autosomal recessive; Toenail dystrophy, isolated, 607523 (3), Autosomal dominant; EBD, localisata variant (3); EBD, Bart type, 132000 (3), Autosomal dominant; Transient bullous of the newborn, 131705 (3), Autosomal recessive, Autosomal dominant; Epidermolysis bullosa dystrophica, AD, 131750 (3), Autos…
COL8A2	Collagen VIII, alpha-2 polypeptide	120252	Corneal dystrophy, posterior polymorphous 2, 609140 (3), Autosomal dominant; Corneal dystrophy, Fuchs endothelial, 1, 136800 (3), Autosomal dominant
COL9A1	Collagen IX, alpha-1 polypeptide	120210	?Epiphyseal dysplasia, multiple, 6, 614135 (3), Autosomal dominant; Stickler syndrome, type IV, 614134 (3)
COL9A2	Collagen IX, alpha-2 polypeptide	120260	?Stickler syndrome, type V, 614284 (3), Autosomal recessive; Epiphyseal dysplasia, multiple, 2, 600204 (3), Autosomal dominant
COL9A3	Collagen IX, alpha-3 polypeptide	120270	Epiphyseal dysplasia, multiple, 3, with or without myopathy, 600969 (3), Autosomal dominant; {Intervertebral disc disease, susceptibility to}, 603932 (3)
COLEC10	Collectin 10	607620	3MC syndrome 3, 248340 (3), Autosomal recessive
COLEC11	Collectin 11	612502	3MC syndrome 2, 265050 (3), Autosomal recessive
COLGALT1	Collagen beta(1-0)galactosyltransferase 1	617531	Brain small vessel disease 3, 618360 (3), Autosomal recessive
COLQ	Collagenic tail of endplate acetylcholinesterase	603033	Myasthenic syndrome, congenital, 5, 603034 (3), Autosomal recessive
COMP	Cartilage oligomeric matrix protein	600310	Epiphyseal dysplasia, multiple, 1, 132400 (3), Autosomal dominant; Pseudoachondroplasia, 177170 (3), Autosomal dominant
COMT	Catechol-O-methyltransferase	116790	{Schizophrenia, susceptibility to}, 181500 (3), Autosomal dominant; {Panic disorder, susceptibility to}, 167870 (3), ?Autosomal dominant
COPA	Coatomer protein complex, subunit alpha	601924	{Autoimmune interstitial lung, joint, and kidney disease}, 616414 (3), Autosomal dominant
COPB2	Coatomer protein complex, subunit beta-2	606990	?Microcephaly 19, primary, autosomal recessive, 617800 (3), Autosomal recessive
COQ2	Coenzyme Q2, polyprenyltransferase	609825	{Multiple system atrophy, susceptibility to}, 146500 (3), Autosomal recessive, Autosomal dominant; Coenzyme Q10 deficiency, primary, 1, 607426 (3), Autosomal recessive
COQ4	Coenzyme Q4, S. cerevisiae, homolog of	612898	Coenzyme Q10 deficiency, primary, 7, 616276 (3), Autosomal recessive
COQ6	Coq6, S. cerevisiae, homolog of	614647	Coenzyme Q10 deficiency, primary, 6, 614650 (3), Autosomal recessive
COQ7	COQ7, S. cerevisiae, homolog of	601683	?Coenzyme Q10 deficiency, primary, 8, 616733 (3), Autosomal recessive
COQ8A	AARF domain-containing kinase 3	606980	Coenzyme Q10 deficiency, primary, 4, 612016 (3), Autosomal recessive
COQ8B	Coenzyme Q8B	615567	Nephrotic syndrome, type 9, 615573 (3), Autosomal recessive
COQ9	Coq9, S. cerevisiae, homolog of	612837	Coenzyme Q10 deficiency, primary, 5, 614654 (3), Autosomal recessive
CORIN	Corin, serine peptidase	605236	Preeclampsia/eclampsia 5, 614595 (3)
CORO1A	Coronin 1A	605000	Immunodeficiency 8, 615401 (3), Autosomal recessive
COX10	Cytochrome c oxidase, subunit X	602125	Mitochondrial complex IV deficiency, 220110 (3), Autosomal recessive, Mitochondrial; Leigh syndrome due to mitochondrial COX4 deficiency, 256000 (3), Autosomal recessive, Mitochondrial
COX14	Cytochrome c oxidase assembly protein COX14	614478	?Mitochondrial complex IV deficiency, 220110 (3), Autosomal recessive, Mitochondrial
COX15	Cytochrome c oxidase, subunit 15	603646	Cardioencephalomyopathy, fatal infantile, due to cytochrome c oxidase deficiency 2, 615119 (3), Autosomal recessive; Leigh syndrome due to cytochrome c oxidase deficiency, 256000 (3), Autosomal recessive, Mitochondrial
COX20	Cytochrome c oxidase assembly factor COX20	614698	Mitochondrial complex IV deficiency, 220110 (3), Autosomal recessive, Mitochondrial
COX4I2	Cytochrome c oxidase, subunit IV, isoform 2	607976	Exocrine pancreatic insufficiency, dyserythropoietic anemia, and calvarial hyperostosis, 612714 (3), Autosomal recessive
COX6A1	Cytochrome c oxidase, subunit VIa, polypeptide-1	602072	Charcot-Marie-Tooth disease, recessive intermediate D, 616039 (3), Autosomal recessive
COX6A2	Cytochrome c oxidase, subunit 6A2	602009	Mitochondrial complex IV deficiency, 220110 (3), Autosomal recessive, Mitochondrial
COX6B1	Cytochrome c oxidase, subunit VIb polypeptide 1 (ubiquitous)	124089	Mitochondrial complex IV deficiency, 220110 (3), Autosomal recessive, Mitochondrial
COX7B	Cytochrome c oxidase, subunit VIIb	300885	Linear skin defects with multiple congenital anomalies 2, 300887 (3), X-linked dominant
COX8A	Cytochrome c oxidase, subunit VIIIA	123870	?Mitochondrial complex IV deficiency, 220110 (3), Autosomal recessive, Mitochondrial
CP	Ceruloplasmin	117700	[Hypoceruloplasminemia, hereditary], 604290 (3), Autosomal recessive; Hemosiderosis, systemic, due to aceruloplasminemia, 604290 (3), Autosomal recessive; Cerebellar ataxia, 604290 (3), Autosomal recessive
CPA6	Carboxypeptidase A6	609562	Febrile seizures, familial, 11, 614418 (3), Autosomal recessive; Epilepsy, familial temporal lobe, 5, 614417 (3), Autosomal recessive, Autosomal dominant
CPAMD8	Complement component 3- and pregnancy zone protein-like alpha-2-macroglobin domain-containing protein 8	608841	Anterior segment dysgenesis 8, 617319 (3), Autosomal recessive
CPLANE1	Ciliogenesis and planar polarity effector 1	614571	Joubert syndrome 17, 614615 (3), Autosomal recessive; Orofaciodigital syndrome VI, 277170 (3), Autosomal recessive
CPLX1	Complexin 1	605032	Epileptic encephalopathy, early infantile, 63, 617976 (3), Autosomal recessive
CPN1	Carboxypeptidase N, polypeptide 1, 50-kD	603103	Carboxypeptidase N deficiency, 212070 (3), Autosomal recessive
CPOX	Coproporphyrinogen oxidase	612732	Harderoporphyria, 121300 (3), Autosomal dominant; Coproporphyria, 121300 (3), Autosomal dominant
CPS1	Carbamoyl-phosphate synthetase 1, mitochondrial	608307	Carbamoylphosphate synthetase I deficiency, 237300 (3), Autosomal recessive; {Pulmonary hypertension, neonatal, susceptibility to}, 615371 (3)
CPT1A	Carnitine palmitoyltransferase I, liver	600528	CPT deficiency, hepatic, type IA, 255120 (3), Autosomal recessive
CPT1C	Carnitine palmitoyltransferase IC	608846	?Spastic paraplegia 73, autosomal dominant, 616282 (3), Autosomal dominant
CPT2	Carnitine palmitoyltransferase II	600650	CPT II deficiency, myopathic, stress-induced, 255110 (3), Autosomal recessive, Autosomal dominant; CPT II deficiency, infantile, 600649 (3), Autosomal recessive; CPT II deficiency, lethal neonatal, 608836 (3), Autosomal recessive; {Encephalopathy, acute, infection-induced, 4, susceptibility to}, 614212 (3), Autosomal recessive, Autosomal dominant
CR1	Complement component (3b/4b) receptor-1	120620	CR1 deficiency (1); [Blood group, Knops system], 607486 (3); {Malaria, severe, resistance to}, 611162 (3); {?SLE susceptibility} (1)
CR2	Complement component (3d/Epstein-Barr virus) receptor-2	120650	{Systemic lupus erythematosus, susceptibility to, 9}, 610927 (3); Immunodeficiency, common variable, 7, 614699 (3), Autosomal recessive
CRADD	Caspase and RIP adaptor with death domain	603454	Mental retardation, autosomal recessive 34, with variant lissencephaly, 614499 (3), Autosomal recessive
CRAT	Carnitine acetyltransferase	600184	?Neurodegeneration with brain iron accumulation 8, 617917 (3), Autosomal recessive
CRB1	Crumbs cell polarity complex component 1	604210	Pigmented paravenous chorioretinal atrophy, 172870 (3), Autosomal dominant; Retinitis pigmentosa-12, 600105 (3), Autosomal recessive; Leber congenital amaurosis 8, 613835 (3), Autosomal recessive
CRB2	Crumbs cell polarity complex component 2	609720	Ventriculomegaly with cystic kidney disease, 219730 (3), Autosomal recessive; Focal segmental glomerulosclerosis 9, 616220 (3), Autosomal recessive
CRBN	Cereblon	609262	Mental retardation, autosomal recessive 2, 607417 (3), Autosomal recessive
CREB1	cAMP-response element-binding protein-1	123810	Histiocytoma, angiomatoid fibrous, somatic, 612160 (3)
CREB3L1	cAMP response element-binding protein 3-like 1	616215	Osteogenesis imperfecta, type XVI, 616229 (3), Autosomal recessive
CREBBP	CREB binding protein	600140	Rubinstein-Taybi syndrome 1, 180849 (3), Autosomal dominant; Menke-Hennekam syndrome 1, 618332 (3)
CRELD1	Cysteine-rich protein with EGF-like domains 1	607170	Atrioventricular septal defect, partial, with heterotaxy syndrome, 606217 (3), Autosomal dominant; {Atrioventricular septal defect, susceptibility to, 2}, 606217 (3), Autosomal dominant
CRIPT	Cystine-rich PDZ binding protein	604594	Short stature with microcephaly and distinctive facies, 615789 (3), Autosomal recessive
CRLF1	Cytokine-like factor 1	604237	Cold-induced sweating syndrome 1, 272430 (3), Autosomal recessive
CRPPA	Isoprenoid synthase domain-containing protein	614631	Muscular dystrophy-dystroglycanopathy (limb-girdle), type C, 7, 616052 (3), Autosomal recessive; Muscular dystrophy-dystroglycanopathy (congenital with brain and eye anomalies), type A, 7, 614643 (3), Autosomal recessive
CRTAP	Cartilage-associated protein	605497	Osteogenesis imperfecta, type VII, 610682 (3), Autosomal recessive
CRTC1	CREB-regulated transcription coactivator 1	607536	Mucoepidermoid salivary gland carcinoma (3)
CRX	Cone-rod homeo box-containing gene	602225	Cone-rod retinal dystrophy-2, 120970 (3), Autosomal dominant; Leber congenital amaurosis 7, 613829 (3)
CRY1	Cryptochrome 1 (photolyase-like)	601933	{Delayed sleep phase disorder, susceptibility to}, 614163 (3), Autosomal dominant
CRYAA	Crystallin, alpha A	123580	Cataract 9, multiple types, 604219 (3), Autosomal recessive, Autosomal dominant
CRYAB	Crystallin, alpha B	123590	Myopathy, myofibrillar, 2, 608810 (3), Autosomal dominant; Cardiomyopathy, dilated, 1II, 615184 (3), Autosomal dominant; Myopathy, myofibrillar, fatal infantile hypertonic, alpha-B crystallin-related, 613869 (3), Autosomal recessive; Cataract 16, multiple types, 613763 (3), Autosomal recessive, Autosomal dominant
CRYBA1	Crystallin, beta A1	123610	Cataract 10, multiple types, 600881 (3), Autosomal dominant
CRYBA2	Crystallin, beta A2	600836	?Cataract 42, 115900 (3), Autosomal dominant
CRYBA4	Crystallin, beta polypeptide A4	123631	Cataract 23, 610425 (3)
CRYBB1	Crystallin, beta B1	600929	Cataract 17, multiple types, 611544 (3), Autosomal recessive, Autosomal dominant
CRYBB2	Crystallin, beta-B2	123620	Cataract 3, multiple types, 601547 (3), Autosomal dominant
CRYBB3	Crystallin, beta-B3	123630	Cataract 22, 609741 (3), Autosomal recessive, Autosomal dominant
CRYGB	Crystallin, gamma B	123670	Cataract 39, multiple types, autosomal dominant, 615188 (3), Autosomal dominant
CRYGC	Crystallin, gamma C	123680	Cataract 2, multiple types, 604307 (3), Autosomal dominant
CRYGD	Crystallin, gamma D	123690	Cataract 4, multiple types, 115700 (3), Autosomal dominant
CRYGS	Crystallin, gamma S	123730	Cataract 20, multiple types, 116100 (3), Autosomal dominant
CRYM	Crystallin, mu	123740	Deafness, autosomal dominant 40, 616357 (3), Autosomal dominant
CSF1R	Colony-stimulating factor-1 receptor; oncogene FMS (McDonough feline sarcoma)	164770	Brain abnormalities, neurodegeneration, and dysosteosclerosis, 618476 (3), Autosomal recessive; Leukoencephalopathy, diffuse hereditary, with spheroids, 221820 (3), Autosomal dominant
CSF2RA	Colony-stimulating factor-2 receptor, alpha, low-affinity, granulocyte-macrophage	306250	Surfactant metabolism dysfunction, pulmonary, 4, 300770 (3)
CSF2RB	Colony-stimulating factor-2 receptor, beta, low-affinity	138981	Surfactant metabolism dysfunction, pulmonary, 5, 614370 (3), Autosomal recessive
CSF3R	Colony-stimulating factor-3 receptor (granulocyte)	138971	Neutropenia, severe congenital, 7, autosomal recessive, 617014 (3), Autosomal recessive
CSH1	Chorionic somatomammotropin hormone-1	150200	[Placental lactogen deficiency] (1)
CSNK1D	Casein kinase-1, delta	600864	Advanced sleep-phase syndrome, familial, 2, 615224 (3), Autosomal dominant
CSNK2A1	Casein kinase-2, alpha-1 polypeptide	115440	Okur-Chung neurodevelopmental syndrome, 617062 (3), Autosomal dominant
CSPP1	Centrosome spindle pole-associated protein 1	611654	Joubert syndrome 21, 615636 (3), Autosomal recessive
CSRP3	Cysteine- and glycine-rich protein 3	600824	Cardiomyopathy, hypertrophic, 12, 612124 (3), Autosomal dominant; ?Cardiomyopathy, dilated, 1M, 607482 (3)
CST3	Cystatin C	604312	Cerebral amyloid angiopathy, 105150 (3), Autosomal dominant; {Macular degeneration, age-related, 11}, 611953 (3)
CST6	Cystatin-M	601891	?Ectodermal dysplasia 15, hypohidrotic/hair type, 618535 (3), Autosomal recessive
CSTA	Cystatin A (stefin A)	184600	Peeling skin syndrome 4, 607936 (3), Autosomal recessive
CSTB	Cystatin B (stefin B)	601145	Epilepsy, progressive myoclonic 1A (Unverricht and Lundborg), 254800 (3), Autosomal recessive
CTBP1	C-terminal binding protein 1	602618	Hypotonia, ataxia, developmental delay, and tooth enamel defect syndrome, 617915 (3), Autosomal dominant
CTC1	Conserved telomere maintenance component 1	613129	Cerebroretinal microangiopathy with calcifications and cysts, 612199 (3), Autosomal recessive
CTCF	CCCTC-binding factor	604167	Mental retardation, autosomal dominant 21, 615502 (3), Autosomal dominant
CTDP1	C-terminal domain of RNA polymerase II subunit A, phosphatase of, subunit 1	604927	Congenital cataracts, facial dysmorphism, and neuropathy, 604168 (3), Autosomal recessive
CTH	Cystathionine gamma-lyase	607657	Homocysteine, total plasma, elevated (3); Cystathioninuria, 219500 (3), Autosomal recessive
CTHRC1	Collagen triple-helix repeat-containing protein 1	610635	Barrett esophagus/esophageal adenocarcinoma, 614266 (3)
CTLA4	Cytotoxic T-lymphocyte-associated serine esterase-4	123890	{Systemic lupus erythematosus, susceptibility to}, 152700 (3), Autosomal dominant; {Diabetes mellitus, insulin-dependent, 12}, 601388 (3); {Celiac disease, susceptibility to, 3}, 609755 (3); Autoimmune lymphoproliferative syndrome, type V, 616100 (3), Autosomal dominant; {Hashimoto thyroiditis}, 140300 (3), Autosomal dominant
CTNNA1	Catenin (cadherin-associated protein), alpha 1, 102kD	116805	Macular dystrophy, patterned, 2, 608970 (3), Autosomal dominant
CTNNA2	Catenin, alpha-2 (cadherin-associated protein, related)	114025	Cortical dysplasia, complex, with other brain malformations 9, 618174 (3), Autosomal recessive
CTNNA3	Catenin, alpha-3	607667	Arrhythmogenic right ventricular dysplasia, familial, 13, 615616 (3), Autosomal dominant
CTNNB1	Catenin (cadherin-associated protein), beta 1, 88kD	116806	Ovarian cancer, somatic, 167000 (3); Colorectal cancer, somatic, 114500 (3); Medulloblastoma, somatic, 155255 (3); Hepatocellular carcinoma, somatic, 114550 (3); Pilomatricoma, somatic, 132600 (3); Neurodevelopmental disorder with spastic diplegia and visual defects, 615075 (3), Autosomal dominant; Exudative vitreoretinopathy 7, 617572 (3), Autosomal dominant
CTNND1	Catenin (cadherin-associated protein), delta 1	601045	Blepharocheilodontic syndrome 2, 617681 (3), Autosomal dominant
CTNS	Cystinosin	606272	Cystinosis, nephropathic, 219800 (3), Autosomal recessive; Cystinosis, ocular nonnephropathic, 219750 (3), Autosomal recessive; Cystinosis, late-onset juvenile or adolescent nephropathic, 219900 (3), Autosomal recessive; Cystinosis, atypical nephropathic, 219800 (3), Autosomal recessive
CTPS1	Cytidine 5'-triphosphate synthetase 1	123860	Immunodeficiency 24, 615897 (3), Autosomal recessive
CTRC	Chymotrypsin	601405	{Pancreatitis, chronic, susceptibility to}, 167800 (3), Autosomal dominant
CTSA	Cathepsin A (protective protein for beta-galactosidase)	613111	Galactosialidosis, 256540 (3), Autosomal recessive
CTSB	Cathepsin B (regulatory element, cis-acting, enhancer upstream of CTSB, included)	116810	Keratolytic winter erythema, 148370 (4), Autosomal dominant
CTSC	Cathepsin C	602365	Periodontitis 1, juvenile, 170650 (3), Autosomal recessive; Papillon-Lefevre syndrome, 245000 (3), Autosomal recessive; Haim-Munk syndrome, 245010 (3), Autosomal recessive
CTSD	Cathepsin D (lysosomal aspartyl protease)	116840	Ceroid lipofuscinosis, neuronal, 10, 610127 (3), Autosomal recessive
CTSF	Cathepsin F	603539	Ceroid lipofuscinosis, neuronal, 13, Kufs type, 615362 (3), Autosomal recessive
CTSK	Cathepsin K	601105	Pycnodysostosis, 265800 (3), Autosomal recessive
CTU2	Cytosolic thiouridylase, subunit 2	617057	Microcephaly, facial dysmorphism, renal agenesis, and ambiguous genitalia syndrome, 618142 (3), Autosomal recessive
CUBN	Cubilin (intrinsic factor-cobalamin receptor)	602997	Megaloblastic anemia-1, Finnish type, 261100 (3), Autosomal recessive
CUL3	Cullin 3	603136	Pseudohypoaldosteronism, type IIE, 614496 (3), Autosomal dominant
CUL4B	Cullin-4B	300304	Mental retardation, X-linked, syndromic 15 (Cabezas type), 300354 (3), X-linked recessive
CUL7	Cullin 7	609577	3-M syndrome 1, 273750 (3), Autosomal recessive
CUX1	Cut-like homeobox 1	116896	Global developmental delay with or without impaired intellectual development, 618330 (3), Autosomal dominant
CUX2	Cut-like homeobox 2	610648	Epileptic encephalopathy, early infantile, 67, 618141 (3), Autosomal dominant
CWC27	CWC27 spliceosome-associated cyclophilin	617170	Retinitis pigmentosa with or without skeletal anomalies, 250410 (3), Autosomal recessive
CWF19L1	CWF19-like protein 1	616120	Spinocerebellar ataxia, autosomal recessive 17, 616127 (3), Autosomal recessive
CX3CR1	Chemokine (C-X3-C) receptor 1 (G protein-coupled receptor-13)	601470	{Rapid progression to AIDS from HIV1 infection}, 609423 (3); {Macular degeneration, age-related, 12}, 613784 (3); {Coronary artery disease, resistance to}, 607339 (3)
CXCL12	Chemokine, C-X-C motif, ligand 12 (stromal cell-derived factor 1)	600835	{AIDS, resistance to}, 609423 (3)
CXCR1	Chemokine, CXC motif, receptor 1	146929	{AIDS, slow progression to}, 609423 (3)
CXCR4	Chemokine (C-X-C motif) receptor 4 (neuropeptide Y receptor Y3)	162643	Myelokathexis, isolated (3); WHIM syndrome, 193670 (3), Autosomal dominant
CXorf56	Chromosome X open reading frame 56	301012	?Mental retardation, X-linked 107, 301013 (3), X-linked
CYB561	Cytochrome b-561	600019	Orthostatic hypotension 2, 618182 (3), Autosomal recessive
CYB5A	Cytochrome b5	613218	Methemoglobinemia and ambiguous genitalia, 250790 (3), Autosomal recessive
CYB5R3	Cytochrome b5 reductase 3	613213	Methemoglobinemia, type I, 250800 (3), Autosomal recessive; Methemoglobinemia, type II, 250800 (3), Autosomal recessive
CYBA	Cytochrome b-245, alpha polypeptide	608508	Chronic granulomatous disease, autosomal, due to deficiency of CYBA, 233690 (3), Autosomal recessive
CYBB	Cytochrome b-245, beta polypeptide	300481	Immunodeficiency 34, mycobacteriosis, X-linked, 300645 (3), X-linked recessive; Chronic granulomatous disease, X-linked, 306400 (3), X-linked recessive
CYC1	Cytochrome c1	123980	Mitochondrial complex III deficiency, nuclear type 6, 615453 (3), Autosomal recessive
CYCS	Cytochrome C, somatic	123970	Thrombocytopenia 4, 612004 (3), Autosomal dominant
CYFIP2	Cytoplasmic FMRP interacting protein 2	606323	Epileptic encephalopathy, early infantile, 65, 618008 (3), Autosomal dominant
CYLD	CYLD gene	605018	Cylindromatosis, familial, 132700 (3), Autosomal dominant; Brooke-Spiegler syndrome, 605041 (3), Autosomal dominant; Trichoepithelioma, multiple familial, 1, 601606 (3), Autosomal dominant
CYP11A1	Cytochrome P450, subfamily XIA, polypeptide 1 (cholesterol side chain cleavage enzyme)	118485	Adrenal insufficiency, congenital, with 46XY sex reversal, partial or complete, 613743 (3)
CYP11B1	Cytochrome P450, subfamily XIB, polypeptide 1 (11-beta-hydroxylase; corticosteroid methyl-oxidase II (CMO II))	610613	Adrenal hyperplasia, congenital, due to 11-beta-hydroxylase deficiency, 202010 (3), Autosomal recessive; Aldosteronism, glucocorticoid-remediable, 103900 (3), Autosomal dominant
CYP11B2	Cytochrome P450, subfamily XIB, polypeptide 2	124080	Aldosterone to renin ratio raised (3); Hypoaldosteronism, congenital, due to CMO II deficiency, 610600 (3), Autosomal recessive; {Low renin hypertension, susceptibility to} (3); Hypoaldosteronism, congenital, due to CMO I deficiency, 203400 (3), Autosomal recessive
CYP17A1	Cytochrome P450, family 17, subfamily A, polypeptide 1 (steroid 17-alpha-hydroxylase)	609300	17-alpha-hydroxylase/17,20-lyase deficiency, 202110 (3), Autosomal recessive; 17,20-lyase deficiency, isolated, 202110 (3), Autosomal recessive
CYP19A1	Cytochrome P450, family 19, subfamily A, polypeptide 1 (aromatization of androgens)	107910	Aromatase deficiency, 613546 (3); Aromatase excess syndrome, 139300 (3), Autosomal dominant
CYP1B1	Cytochrome P450, subfamily I, dioxin-inducible, polypeptide 1	601771	Glaucoma 3A, primary open angle, congenital, juvenile, or adult onset, 231300 (3), Autosomal recessive; Anterior segment dysgenesis 6, multiple subtypes, 617315 (3)
CYP21A2	Cytochrome P450, subfamily XXIA, polypeptide 2 (steroid 21-hydroxylase)	613815	Adrenal hyperplasia, congenital, due to 21-hydroxylase deficiency, 201910 (3), Autosomal recessive; Hyperandrogenism, nonclassic type, due to 21-hydroxylase deficiency, 201910 (3), Autosomal recessive
CYP24A1	Cytochrome P450, family 24, subfamily A, polypeptide 1 (vitamin D 24-hydroxylase)	126065	Hypercalcemia, infantile, 1, 143880 (3), Autosomal recessive
CYP26B1	Cytochrome P450, subfamily XXVIB, polypeptide 1	605207	Craniosynostosis with radiohumeral fusions and other skeletal and craniofacial anomalies, 614416 (3)
CYP26C1	Cytochrome P450, subfamily XXVIC, polypeptide 1	608428	Focal facial dermal dysplasia 4, 614974 (3), Autosomal recessive
CYP27A1	Cytochrome P450, subfamily XXVIIA, polypeptide 1 (sterol 27-hydroxylase)	606530	Cerebrotendinous xanthomatosis, 213700 (3), Autosomal recessive
CYP27B1	Cytochrome P450, subfamily XXVIIB, polypeptide 1	609506	Vitamin D-dependent rickets, type I, 264700 (3), Autosomal recessive
CYP2A6	Cytochrome P450, subfamily IIA, phenobarbital-inducible, polypeptide 6	122720	Coumarin resistance, 122700 (3), Autosomal dominant; {Lung cancer, resistance to}, 211980 (3), Autosomal dominant, Somatic mutation; {Nicotine addiction, protection from}, 188890 (3)
CYP2B6	Cytochrome P450, family 2, subfamily B, polypeptide 6	123930	{Efavirenz central nervous system toxicity, susceptibility to}, 614546 (3); Efavirenz, poor metabolism of, 614546 (3)
CYP2C19	Cytochrome P450, subfamily IIC (mephenytoin 4'-hydroxylase)	124020	Clopidogrel, impaired responsiveness to, 609535 (3), Autosomal recessive; Mephenytoin poor metabolizer, 609535 (3), Autosomal recessive; Proguanil poor metabolizer, 609535 (3), Autosomal recessive; Omeprazole poor metabolizer, 609535 (3), Autosomal recessive
CYP2C8	Cytochrome P450, subfamily IIc, polypeptide 8	601129	{Drug metabolism, altered, CYP2C8-related}, 618018 (3)
CYP2C9	Cytochrome P450, subfamily IIC (mephenytoin 4-hydroxylase), polypeptide 9	601130	Warfarin sensitivity, 122700 (3), Autosomal dominant; Tolbutamide poor metabolizer (3)
CYP2D6	Cytochrome P450, subfamily IID, polypeptide 6	124030	{Debrisoquine sensitivity}, 608902 (3), Autosomal recessive; {Codeine sensitivity}, 608902 (3), Autosomal recessive
CYP2R1	Cytochrome P450, subfamily IIR, polypeptide 1 (vitamin D 25-hydroxylase)	608713	Rickets due to defect in vitamin D 25-hydroxylation, 600081 (3), Autosomal recessive
CYP2U1	Cytochrome P450, family 2, subfamily U, polypeptide 1	610670	Spastic paraplegia 56, autosomal recessive, 615030 (3), Autosomal recessive
CYP3A5	Cytochrome P450, subfamily IIIA, polypeptide 5	605325	{Hypertension, salt-sensitive essential, susceptibility to}, 145500 (3), Multifactorial
CYP4F22	Cytochrome P450, family 4, subfamily F, polypeptide 22	611495	Ichthyosis, congenital, autosomal recessive 5, 604777 (3), Autosomal recessive
CYP4V2	Cytochrome P450, family 4, subfamily V, polypeptide 2	608614	Bietti crystalline corneoretinal dystrophy, 210370 (3), Autosomal recessive
CYP7B1	Cytochrome P450, subfamily VIIB (oxysterol 7-alpha-hydroxylase), polypeptide 1	603711	Spastic paraplegia 5A, autosomal recessive, 270800 (3), Autosomal recessive; Bile acid synthesis defect, congenital, 3, 613812 (3), Autosomal recessive
D2HGDH	D-2-hydroxyglutarate dehydrogenase	609186	D-2-hydroxyglutaric aciduria, 600721 (3), Autosomal recessive
DAB1	DAB adaptor protein 1	603448	Spinocerebellar ataxia 37, 615945 (3), Autosomal dominant
DACT1	Dapper, antagonist of beta-catenin, 1	607861	?Townes-Brocks syndrome 2, 617466 (3), Autosomal dominant
DAG1	Dystrophin-associated glycoprotein-1	128239	Muscular dystrophy-dystroglycanopathy (limb-girdle), type C, 9, 613818 (3), Autosomal recessive; Muscular dystrophy-dystroglycanopathy (congenital with brain and eye anomalies), type A, 9, 616538 (3), Autosomal recessive
DAOA	D-amino acid oxidase activator	607408	{Schizophrenia}, 181500 (2), Autosomal dominant
DARS1	Aspartyl tRNA synthetase 1	603084	Hypomyelination with brainstem and spinal cord involvement and leg spasticity, 615281 (3), Autosomal recessive
DARS2	Aspartyl-tRNA synthetase 2	610956	Leukoencephalopathy with brain stem and spinal cord involvement and lactate elevation, 611105 (3), Autosomal recessive
DAZL	Deleted in azoospermia-like	601486	{Spermatogenic failure, susceptibility to} (3)
DBH	Dopamine-beta-hydroxylase	609312	Orthostatic hypotension 1, due to DBH deficiency, 223360 (3), Autosomal recessive
DBT	Dihydrolipoamide branched chain transacylase (E2 component of branched chain keto acid dehydrogenase complex)	248610	Maple syrup urine disease, type II, 248600 (3), Autosomal recessive
DCAF17	DDB1- and CUL4-associated factor 17	612515	Woodhouse-Sakati syndrome, 241080 (3), Autosomal recessive
DCAF8	DDB1- and CUL4-associated factor 8	615820	?Giant axonal neuropathy 2, autosomal dominant, 610100 (3), Autosomal dominant
DCC	Deleted in colorectal carcinoma	120470	Esophageal carcinoma, somatic, 133239 (3); Gaze palsy, familial horizontal, with progressive scoliosis, 2, 617542 (3), Autosomal recessive; Mirror movements 1 and/or agenesis of the corpus callosum, 157600 (3), Autosomal dominant; Colorectal cancer, somatic, 114500 (3)
DCDC2	Doublecortin domain-containing protein 2	605755	Sclerosing cholangitis, neonatal, 617394 (3), Autosomal recessive; Nephronophthisis 19, 616217 (3), Autosomal recessive; ?Deafness, autosomal recessive 66, 610212 (3), Autosomal recessive
DCHS1	Dachsous, Drosophila, homolog of, 1	603057	Mitral valve prolapse 2, 607829 (3), Autosomal dominant; Van Maldergem syndrome 1, 601390 (3), Autosomal recessive
DCLRE1C	DNA cross-link repair protein 1C	605988	Omenn syndrome, 603554 (3), Autosomal recessive; Severe combined immunodeficiency, Athabascan type, 602450 (3), Autosomal recessive
DCN	Decorin	125255	Corneal dystrophy, congenital stromal, 610048 (3), Autosomal dominant
DCPS	Decapping enzyme, scavenger	610534	Al-Raqad syndrome, 616459 (3), Autosomal recessive
DCTN1	Dynactin 1 (p150, glued, Drosophila, homolog of)	601143	{Amyotrophic lateral sclerosis, susceptibility to}, 105400 (3), Autosomal recessive, Autosomal dominant; Perry syndrome, 168605 (3), Autosomal dominant; Neuropathy, distal hereditary motor, type VIIB, 607641 (3), Autosomal dominant
DCX	Doublecortin	300121	Subcortical laminal heterotopia, X-linked, 300067 (3), X-linked; Lissencephaly, X-linked, 300067 (3), X-linked
DCXR	Dicarbonyl/L-xylulose reductase	608347	[Pentosuria], 260800 (3), Autosomal recessive
DDB2	Damage-specific DNA binding protein 2, 48kD	600811	Xeroderma pigmentosum, group E, DDB-negative subtype, 278740 (3), Autosomal recessive
DDC	DOPA decarboxylase (aromatic L-amino acid decarboxylase)	107930	Aromatic L-amino acid decarboxylase deficiency, 608643 (3), Autosomal recessive
DDHD1	DDHD domain-containing protein 1	614603	Spastic paraplegia 28, autosomal recessive, 609340 (3), Autosomal recessive
DDHD2	DDHD domain-containing protein 2	615003	Spastic paraplegia 54, autosomal recessive, 615033 (3), Autosomal recessive
DDOST	Dolichyl-diphosphooligosaccharide-protein glycosyltransferase	602202	?Congenital disorder of glycosylation, type Ir, 614507 (3), Autosomal recessive
DDR2	Discoidin domain receptor family, member 2	191311	Spondylometaepiphyseal dysplasia, short limb-hand type, 271665 (3), Autosomal recessive; Warburg-Cinotti syndrome, 618175 (3), Autosomal dominant
DDRGK1	DDRGK domain-containing protein 1	616177	Spondyloepimetaphyseal dysplasia, Shohat type, 602557 (3), Autosomal recessive
DDX11	DEAD/H box-11 (CHL1-related helicase gene-1)	601150	Warsaw breakage syndrome, 613398 (3), Autosomal recessive
DDX3X	DEAD/H box-3, X-linked	300160	Mental retardation, X-linked 102, 300958 (3), X-linked recessive, X-linked dominant
DDX41	DEAD/H box 41	608170	{Myeloproliferative/lymphoproliferative neoplasms, familial (multiple types), susceptibility to}, 616871 (3), Autosomal dominant
DDX58	DEAD box polypeptide 58	609631	Singleton-Merten syndrome 2, 616298 (3), Autosomal dominant
DDX59	DEAD box polypeptide 59	615464	Orofaciodigital syndrome V, 174300 (3), Autosomal recessive
DDX6	DEAD/H box-6 (RNA helicase, 54kD)	600326	Intellectual developmental disorder with impaired language and dysmorphic facies, 618653 (3), Autosomal dominant
DEAF1	Deaf1, Drosophila, homolog of	602635	Mental retardation, autosomal dominant 24, 615828 (3), Autosomal dominant; ?Dyskinesia, seizures, and intellectual developmental disorder, 617171 (3), Autosomal recessive
DEGS1	Delta(4)-desaturase, sphingolipid, 1	615843	Leukodystrophy, hypomyelinating, 18, 618404 (3), Autosomal recessive
DEK	DEK oncogene	125264	Leukemia, acute nonlymphocytic, 125264 (2)
DENND5A	DENN domain-containing protein 5A	617278	Epileptic encephalopathy, early infantile, 49, 617281 (3), Autosomal recessive
DEPDC5	DEP domain-containing protein 5	614191	Epilepsy, familial focal, with variable foci 1, 604364 (3), Autosomal dominant
DES	Desmin	125660	Cardiomyopathy, dilated, 1I, 604765 (3); Scapuloperoneal syndrome, neurogenic, Kaeser type, 181400 (3), Autosomal dominant; Myopathy, myofibrillar, 1, 601419 (3), Autosomal recessive, Autosomal dominant
DGAT1	Diacylglycerol O-acyltransferase 1	604900	?Diarrhea 7, protein-losing enteropathy type, 615863 (3), Autosomal recessive
DGKE	Diacylglycerol kinase, epsilon, 64-kD	601440	{Hemolytic uremic syndrome, atypical, susceptibility to, 7}, 615008 (3), Autosomal recessive; Nephrotic syndrome, type 7, 615008 (3), Autosomal recessive
DGUOK	Deoxyguanosine kinase, mitochondrial	601465	Progressive external ophthalmoplegia with mitochondrial DNA deletions, autosomal recessive 4, 617070 (3), Autosomal recessive; Portal hypertension, noncirrhotic, 617068 (3), Autosomal recessive; Mitochondrial DNA depletion syndrome 3 (hepatocerebral type), 251880 (3), Autosomal recessive
DHCR24	24-dehydrocholesterol reductase	606418	Desmosterolosis, 602398 (3), Autosomal recessive
DHCR7	Delta-7-dehydrocholesterol reductase	602858	Smith-Lemli-Opitz syndrome, 270400 (3), Autosomal recessive
DHDDS	Dehydrodolichyl diphosphate synthase	608172	Retinitis pigmentosa 59, 613861 (3), Autosomal recessive; Developmental delay and seizures with or without movement abnormalities, 617836 (3), Autosomal dominant; ?Congenital disorder of glycosylation, type 1bb, 613861 (3), Autosomal recessive
DHFR	Dihydrofolate reductase	126060	Megaloblastic anemia due to dihydrofolate reductase deficiency, 613839 (3), Autosomal recessive
DHH	Desert hedgehog signaling molecule	605423	46XY sex reversal 7, 233420 (3), Autosomal recessive; 46XY partial gonadal dysgenesis, with minifascicular neuropathy, 607080 (3)
DHODH	Dihydroorotate dehydrogenase	126064	Miller syndrome, 263750 (3), Autosomal recessive
DHPS	Deoxyhypusine synthase	600944	Neurodevelopmental disorder with seizures and speech and walking impairment, 618480 (3), Autosomal recessive
DHTKD1	Dehydrogenase E1 and transketolase domains-containing protein 1	614984	2-aminoadipic 2-oxoadipic aciduria, 204750 (3), Autosomal recessive; ?Charcot-Marie-Tooth disease, axonal, type 2Q, 615025 (3), Autosomal dominant
DHX30	DEAH box polypeptide 30	616423	Neurodevelopmental disorder with severe motor impairment and absent language, 617804 (3), Autosomal dominant
DHX38	DEAH (Asp-Glu-Ala-His) box polypeptide 38 (PRP6, S. cerevisiae, homolog of)	605584	Retinitis pigmentosa 84, 618220 (3), Autosomal recessive
DIABLO	Second mitochondria-derived activator of caspase	605219	Deafness, autosomal dominant 64, 614152 (3), Autosomal dominant
DIAPH1	Diaphanous-related formin 1	602121	Seizures, cortical blindness, microcephaly syndrome, 616632 (3), Autosomal recessive; Deafness, autosomal dominant 1, 124900 (3), Autosomal dominant
DIAPH2	diaphanous-related formin 2	300108	?Premature ovarian failure 2A, 300511 (3), X-linked dominant
DIAPH3	Diaphanous-related formin 3	614567	Auditory neuropathy, autosomal dominant, 1, 609129 (3), Autosomal dominant
DICER1	dicer 1, ribonuclease III	606241	GLOW syndrome, somatic mosaic, 618272 (3); Rhabdomyosarcoma, embryonal, 2, 180295 (3); Goiter, multinodular 1, with or without Sertoli-Leydig cell tumors, 138800 (3), Autosomal dominant; Pleuropulmonary blastoma, 601200 (3), Autosomal dominant
DIP2B	Disco-interacting protein 2 homolog B	611379	Mental retardation, FRA12A type, 136630 (3), Autosomal dominant
DIS3L2	DIS3 like exosome 3'-5' exoribonuclease 2	614184	Perlman syndrome, 267000 (3), Autosomal recessive
DISC1	Disrupted in schizophrenia 1	605210	{Schizophrenia 9, susceptibility to}, 604906 (3)
DISC2	Disrupted in schizophrenia 2	606271	Schizophrenia, 181500 (2), Autosomal dominant
DKC1	Dyskerin	300126	Dyskeratosis congenita, X-linked, 305000 (3), X-linked recessive
DLAT	Dihydrolipoamide S-acetyltransferase	608770	Pyruvate dehydrogenase E2 deficiency, 245348 (3), Autosomal recessive
DLC1	DLC1 Rho GTPase activating protein	604258	Colorectal cancer, somatic, 114500 (3)
DLD	Dihydrolipoamide dehydrogenase (E3 component of pyruvate dehydrogenase complex, 2-oxo-glutarate complex)	238331	Dihydrolipoamide dehydrogenase deficiency, 246900 (3), Autosomal recessive
DLG3	Discs large MAGUK scaffold protein 3	300189	Mental retardation, X-linked 90, 300850 (3), X-linked recessive
DLL3	Delta-like canonical Notch ligand 3	602768	Spondylocostal dysostosis 1, autosomal recessive, 277300 (3), Autosomal recessive
DLL4	Delta-like canonical Notch ligand 4	605185	Adams-Oliver syndrome 6, 616589 (3), Autosomal dominant
DLST	Dihydrolipoamide S-succinyltransferase (E2 component of 2-oxo-glutarate complex)	126063	Paragangliomas 7, 618475 (3), Autosomal dominant
DLX3	Distal-less homeo box-3	600525	Trichodontoosseous syndrome, 190320 (3), Autosomal dominant; Amelogenesis imperfecta, type IV, 104510 (3), Autosomal dominant
DLX4	Distal-less homeo box-4	601911	?Orofacial cleft 15, 616788 (3), Autosomal dominant
DLX5	Distal-less homeo box-5	600028	?Split-hand/foot malformation 1 with sensorineural hearing loss, 220600 (3), Autosomal recessive
DMD	Dystrophin	300377	Cardiomyopathy, dilated, 3B, 302045 (3), X-linked; Becker muscular dystrophy, 300376 (3), X-linked recessive; Duchenne muscular dystrophy, 310200 (3), X-linked recessive
DMGDH	Dimethylglycine dehydrogenase	605849	Dimethylglycine dehydrogenase deficiency, 605850 (3), Autosomal recessive
DMP1	Dentin matrix acidic phosphoprotein	600980	Hypophosphatemic rickets, AR, 241520 (3), Autosomal recessive
DMPK	Dystrophia myotonica-protein kinase	605377	Myotonic dystrophy 1, 160900 (3), Autosomal dominant
DMXL2	DMX-like 2	612186	?Deafness, autosomal dominant 71, 617605 (3), Autosomal dominant; ?Polyendocrine-polyneuropathy syndrome, 616113 (3), Autosomal recessive; Epileptic encephalopathy, early infantile, 81, 618663 (3), Autosomal recessive
DNA2	DNA replication helicase/nuclease 2	601810	Progressive external ophthalmoplegia with mitochondrial DNA deletions, autosomal dominant 6, 615156 (3), Autosomal dominant; ?Seckel syndrome 8, 615807 (3), Autosomal recessive
DNAAF1	Dynein, axonemal, assembly factor 1	613190	Ciliary dyskinesia, primary, 13, 613193 (3), Autosomal recessive
DNAAF2	Kintoun, Medaka, homolog of	612517	Ciliary dyskinesia, primary, 10, 612518 (3)
DNAAF3	Dynein, axonemal, assembly factor 3	614566	Ciliary dyskinesia, primary, 2, 606763 (3), Autosomal recessive
DNAAF4	Dynein, axonemal, assembly factor 4	608706	{Dyslexia, susceptibility to, 1}, 127700 (3), Autosomal dominant; Ciliary dyskinesia, primary, 25, 615482 (3), Autosomal recessive
DNAAF5	Dynein axonemal assembly factor 5	614864	Ciliary dyskinesia, primary, 18, 614874 (3), Autosomal recessive
DNAH1	Dynein, axonemal, heavy chain-1	603332	?Ciliary dyskinesia, primary, 37, 617577 (3), Autosomal recessive; Spermatogenic failure 18, 617576 (3), Autosomal recessive
DNAH11	Dynein, axonemal, heavy chain-11	603339	Ciliary dyskinesia, primary, 7, with or without situs inversus, 611884 (3), Autosomal recessive
DNAH17	Dynein, axonemal, heavy chain 17	610063	Spermatogenic failure 39, 618643 (3), Autosomal recessive
DNAH5	Dynein, axonemal, heavy chain 5	603335	Ciliary dyskinesia, primary, 3, with or without situs inversus, 608644 (3)
DNAH9	Dynein, axonemal, heavy chain 9	603330	Ciliary dyskinesia, primary, 40, 618300 (3), Autosomal recessive
DNAI1	Dynein, axonemal, intermediate chain 1	604366	Ciliary dyskinesia, primary, 1, with or without situs inversus, 244400 (3), Autosomal recessive
DNAI2	Dynein, axonemal, intermediate chain 2	605483	Ciliary dyskinesia, primary, 9, with or without situs inversus, 612444 (3)
DNAJB11	DNAJ/HSP40 homolog, subfamily B, member 11	611341	Polycystic kidney disease 6 with or without polycystic liver disease, 618061 (3), Autosomal dominant
DNAJB13	DNAJ/HSP40 homolog, subfamily B, member 13	610263	Ciliary dyskinesia, primary, 34, 617091 (3), Autosomal recessive
DNAJB2	DnaJ, E. coli, homolog of, subfamily B, member 2 (heat-shock protein, DNAJ-like 1)	604139	Spinal muscular atrophy, distal, autosomal recessive, 5, 614881 (3), Autosomal recessive
DNAJB6	DNAJ/HSP40 homolog, subfamily B, member 6	611332	Muscular dystrophy, limb-girdle, autosomal dominant 1, 603511 (3), Autosomal dominant
DNAJC12	DNAJ/HSP40 homolog, subfamily C, member 12	606060	Hyperphenylalaninemia, mild, non-BH4-deficient, 617384 (3), Autosomal recessive
DNAJC19	DnaJ (Hsp40) homolog, subfamily C, member 19 (translocase of inner mitochondrial membrane 14, yeast, homolog of)	608977	3-methylglutaconic aciduria, type V, 610198 (3), Autosomal recessive
DNAJC21	DNAJ/HSP40 homolog, subfamily C, member 21	617048	Bone marrow failure syndrome 3, 617052 (3), Autosomal recessive
DNAJC3	DnaJ, E. coli, homolog of, subfamily C, member 3 (protein kinase inhibitor p58)	601184	?Ataxia, combined cerebellar and peripheral, with hearing loss and diabetes mellitus, 616192 (3), Autosomal recessive
DNAJC5	DNAJ/HSP40 homolog, subfamily C, member 5	611203	Ceroid lipofuscinosis, neuronal, 4, Parry type, 162350 (3), Autosomal dominant
DNAJC6	DNAJ heat shock protein family (Hsp40) member C6	608375	Parkinson disease 19b, early-onset, 615528 (3), Autosomal recessive; Parkinson disease 19a, juvenile-onset, 615528 (3), Autosomal recessive
DNAL1	Dynein, axonemal, light chain 1	610062	Ciliary dyskinesia, primary, 16, 614017 (3), Autosomal recessive
DNAL4	Dynein, axonemal, light chain 4	610565	?Mirror movements 3, 616059 (3), Autosomal recessive
DNASE1	Deoxyribonuclease I	125505	{Systemic lupus erythematosus, susceptibility to}, 152700 (3), Autosomal dominant
DNASE1L3	Deoxyribonuclease I-like 3	602244	Systemic lupus erythematosus 16, 614420 (3), Autosomal recessive
DNM1	Dynamin-1	602377	Epileptic encephalopathy, early infantile, 31, 616346 (3), Autosomal dominant
DNM1L	Dynamin 1-like	603850	Encephalopathy, lethal, due to defective mitochondrial peroxisomal fission 1, 614388 (3), Autosomal recessive, Autosomal dominant; Optic atrophy 5, 610708 (3), Autosomal dominant
DNM2	Dynamin-2	602378	Lethal congenital contracture syndrome 5, 615368 (3), Autosomal recessive; Charcot-Marie-Tooth disease, axonal type 2M, 606482 (3), Autosomal dominant; Centronuclear myopathy 1, 160150 (3), Autosomal dominant; Charcot-Marie-Tooth disease, dominant intermediate B, 606482 (3), Autosomal dominant
DNMBP	Dynamin-binding protein	611282	Cataract 48, 618415 (3), Autosomal recessive
DNMT1	DNA methyltransferase 1	126375	Cerebellar ataxia, deafness, and narcolepsy, autosomal dominant, 604121 (3), Autosomal dominant; Neuropathy, hereditary sensory, type IE, 614116 (3), Autosomal dominant
DNMT3A	DNA methyltransferase 3A	602769	Acute myeloid leukemia, somatic, 601626 (3); Tatton-Brown-Rahman syndrome, 615879 (3), Autosomal dominant
DNMT3B	DNA methyltransferase 3B	602900	Immunodeficiency-centromeric instability-facial anomalies syndrome 1, 242860 (3), Autosomal recessive
DOCK2	Dedicator of cytokinesis 2	603122	Immunodeficiency 40, 616433 (3), Autosomal recessive
DOCK3	Dedicator of cytokinesis 3	603123	Neurodevelopmental disorder with impaired intellectual development, hypotonia, and ataxia, 618292 (3), Autosomal recessive
DOCK6	Dedicator of cytokinesis 6	614194	Adams-Oliver syndrome 2, 614219 (3), Autosomal recessive
DOCK7	Dedicator of cytokinesis 7	615730	Epileptic encephalopathy, early infantile, 23, 615859 (3), Autosomal recessive
DOCK8	Dedicator of cytokinesis 8	611432	Hyper-IgE recurrent infection syndrome, autosomal recessive, 243700 (3), Autosomal recessive
DOK7	Downstream of tyrosine kinase 7	610285	Myasthenic syndrome, congenital, 10, 254300 (3), Autosomal recessive; ?Fetal akinesia deformation sequence 3, 618389 (3)
DOLK	Dolichol kinase	610746	Congenital disorder of glycosylation, type Im, 610768 (3), Autosomal recessive
DONSON	Downstream neighbor of SON	611428	Microcephaly-micromelia syndrome, 251230 (3), Autosomal recessive; Microcephaly, short stature, and limb abnormalities, 617604 (3), Autosomal recessive
DPAGT1	Dolichyl-phosphate N-acetylglucosamine phosphotransferase	191350	Congenital disorder of glycosylation, type Ij, 608093 (3), Autosomal recessive; Myasthenic syndrome, congenital, 13, with tubular aggregates, 614750 (3), Autosomal recessive
DPF2	D4, zinc, and double PHD fingers family, member 2	601671	Coffin-Siris syndrome 7, 618027 (3), Autosomal dominant
DPH1	Diphthamide biosynthesis protein 1	603527	Developmental delay with short stature, dysmorphic facial features, and sparse hair, 616901 (3), Autosomal recessive
DPM1	Dolichyl-phosphate mannosyltransferase 1, catalytic subunit	603503	Congenital disorder of glycosylation, type Ie, 608799 (3), Autosomal recessive
DPM2	Dolichyl-phosphate mannosyltransferase 2, regulatory subunit	603564	Congenital disorder of glycosylation, type Iu, 615042 (3), Autosomal recessive
DPM3	Dolichyl-phosphate mannosyltransferase 3	605951	Muscular dystrophy-dystroglycanopathy (limb-girdle), type C, 15, 612937 (3), Autosomal recessive
DPP6	Dipeptidylpeptidase VI	126141	Mental retardation, autosomal dominant 33, 616311 (3); {Ventricular fibrillation, paroxysmal familial, 2}, 612956 (3), Autosomal dominant
DPY19L2	DPY19-like 2	613893	Spermatogenic failure 9, 613958 (3), Autosomal recessive
DPYD	Dihydropyrimidine dehydrogenase	612779	Dihydropyrimidine dehydrogenase deficiency, 274270 (3), Autosomal recessive; 5-fluorouracil toxicity, 274270 (3), Autosomal recessive
DPYS	Dihydropyrimidinase	613326	Dihydropyrimidinuria, 222748 (3), Autosomal recessive
DRAM2	Damage-regulated autophagy modulator 2	613360	Cone-rod dystrophy 21, 616502 (3), Autosomal recessive
DRC1	Dynein regulatory complex, subunit 1	615288	Ciliary dyskinesia, primary, 21, 615294 (3), Autosomal recessive
DRD3	Dopamine receptor D3	126451	{Schizophrenia, susceptibility to}, 181500 (3), Autosomal dominant; {Essential tremor, hereditary, 1}, 190300 (3), Autosomal dominant
DRD4	Dopamine receptor D4	126452	{Attention deficit-hyperactivity disorder}, 143465 (3), Autosomal dominant; [Novelty seeking personality], 601696 (1), ?Autosomal dominant; Autonomic nervous system dysfunction (3)
DRD5	Dopamine receptor D5	126453	{Attention deficit-hyperactivity disorder, susceptibility to}, 143465 (3), Autosomal dominant; {Blepharospasm, primary benign}, 606798 (3), Autosomal dominant
DSC2	Desmocollin-2	125645	Arrhythmogenic right ventricular dysplasia 11 with mild palmoplantar keratoderma and woolly hair, 610476 (3), Autosomal recessive, Autosomal dominant; Arrhythmogenic right ventricular dysplasia 11, 610476 (3), Autosomal recessive, Autosomal dominant
DSC3	Desmocollin-3	600271	?Hypotrichosis and recurrent skin vesicles, 613102 (3), Autosomal recessive
DSE	Dermatan sulfate epimerase	605942	Ehlers-Danlos syndrome, musculocontractural type 2, 615539 (3), Autosomal recessive
DSG1	Desmoglein-1	125670	Keratosis palmoplantaris striata I, AD, 148700 (3), Autosomal dominant; Erythroderma, congenital, with palmoplantar keratoderma, hypotrichosis, and hyper IgE, 615508 (3), Autosomal recessive
DSG2	Desmoglein-2	125671	Arrhythmogenic right ventricular dysplasia 10, 610193 (3), Autosomal dominant; Cardiomyopathy, dilated, 1BB, 612877 (3)
DSG4	Desmoglein 4	607892	Hypotrichosis 6, 607903 (3), Autosomal recessive
DSP	Desmoplakin	125647	Keratosis palmoplantaris striata II, 612908 (3), Autosomal dominant; Arrhythmogenic right ventricular dysplasia 8, 607450 (3), Autosomal dominant; Epidermolysis bullosa, lethal acantholytic, 609638 (3), Autosomal recessive; Cardiomyopathy, dilated, with woolly hair and keratoderma, 605676 (3), Autosomal recessive; Skin fragility-woolly hair syndrome, 607655 (3), Autosomal recessive; Dilated cardi…
DSPP	Dentin sialophosphoprotein	125485	Dentin dysplasia, type II, 125420 (3), Autosomal dominant; Deafness, autosomal dominant 39, with dentinogenesis, 605594 (3), Autosomal dominant; Dentinogenesis imperfecta, Shields type II, 125490 (3), Autosomal dominant; Dentinogenesis imperfecta, Shields type III, 125500 (3), Autosomal dominant
DST	Dystonin (bullous pemphigoid antigen 1)	113810	?Neuropathy, hereditary sensory and autonomic, type VI, 614653 (3), Autosomal recessive; Epidermolysis bullosa simplex, autosomal recessive 2, 615425 (3), Autosomal recessive
DSTYK	Dual serine/threonine and tyrosine protein kinase	612666	Congenital anomalies of kidney and urinary tract 1, 610805 (3), Autosomal dominant; Spastic paraplegia 23, 270750 (3), Autosomal recessive
DTNA	Dystobrevin, alpha (dystrophin-related protein 3)	601239	Left ventricular noncompaction 1, with or without congenital heart defects, 604169 (3), Autosomal dominant
DTNBP1	Dystrobrevin-binding protein 1 (dysbindin)	607145	Hermansky-Pudlak syndrome 7, 614076 (3), Autosomal recessive
DUOX2	Dual oxidase 2 (thyroid oxidase 2)	606759	Thyroid dyshormonogenesis 6, 607200 (3), Autosomal recessive
DUOXA2	Dual oxidase maturation factor 2	612772	Thyroid dyshormonogenesis 5, 274900 (3), Autosomal recessive
DUSP6	Dual-specificity phosphatase-6	602748	Hypogonadotropic hypogonadism 19 with or without anosmia, 615269 (3), Autosomal dominant
DVL1	Dishevelled segment polarity protein 1	601365	Robinow syndrome, autosomal dominant 2, 616331 (3), Autosomal dominant
DVL3	Dishevelled 3 (homologous to Drosophila dsh)	601368	Robinow syndrome, autosomal dominant 3, 616894 (3), Autosomal dominant
DYM	Dymeclin	607461	Smith-McCort dysplasia, 607326 (3), Autosomal recessive; Dyggve-Melchior-Clausen disease, 223800 (3), Autosomal recessive
DYNC1H1	Dynein, cytoplasmic-1, heavy chain-1	600112	Mental retardation, autosomal dominant 13, 614563 (3), Autosomal dominant; Spinal muscular atrophy, lower extremity-predominant 1, AD, 158600 (3), Autosomal dominant; Charcot-Marie-Tooth disease, axonal, type 20, 614228 (3), Autosomal dominant
DYNC1I2	Dynein, cytoplasmic-1, intermediate chain-2	603331	Neurodevelopmental disorder with microcephaly and structural brain anomalies, 618492 (3), Autosomal recessive
DYNC2H1	Dynein, cytoplasmic-2, heavy chain-1	603297	Short-rib thoracic dysplasia 3 with or without polydactyly, 613091 (3), Autosomal recessive, Digenic recessive
DYNC2LI1	Dynein, cytoplasmic 2, light intermediate chain 1	617083	Short-rib thoracic dysplasia 15 with polydactyly, 617088 (3), Autosomal recessive
DYRK1A	Dual specificity tyrosine-(Y)-phosphorylation regulated kinase-1A (\'minibrain\', Drosophila, homolog of)	600855	Mental retardation, autosomal dominant 7, 614104 (3), Autosomal dominant
DYRK1B	Dual-specificity tyrosine phosphorylation-regulated kinase 1B	604556	Abdominal obesity-metabolic syndrome 3, 615812 (3), Autosomal dominant
DYSF	Dysferlin	603009	Miyoshi muscular dystrophy 1, 254130 (3), Autosomal recessive; Muscular dystrophy, limb-girdle, autosomal recessive 2, 253601 (3), Autosomal recessive; Myopathy, distal, with anterior tibial onset, 606768 (3), Autosomal recessive
DZIP1L	DAZ-interacting zinc finger protein 1-like	617570	Polycystic kidney disease 5, 617610 (3), Autosomal recessive
EARS2	Glutamyl-tRNA synthetase 2	612799	Combined oxidative phosphorylation deficiency 12, 614924 (3), Autosomal recessive
EBF3	Early B-cell factor 3	607407	Hypotonia, ataxia, and delayed development syndrome, 617330 (3), Autosomal dominant
EBP	Emopamil-binding protein	300205	Chondrodysplasia punctata, X-linked dominant, 302960 (3), X-linked dominant; MEND syndrome, 300960 (3), X-linked recessive
ECE1	Endothelin converting enzyme 1	600423	{Hypertension, essential, susceptibility to}, 145500 (3), Multifactorial; ?Hirschsprung disease, cardiac defects, and autonomic dysfunction, 613870 (3), Autosomal dominant
ECEL1	Endothelin-converting enzyme-like 1	605896	Arthrogryposis, distal, type 5D, 615065 (3), Autosomal recessive
ECHS1	Enoyl-CoA hydratase, short-chain, 1, mitochondrial	602292	Mitochondrial short-chain enoyl-CoA hydratase 1 deficiency, 616277 (3), Autosomal recessive
ECM1	Extracellular matrix protein-1	602201	Urbach-Wiethe disease, 247100 (3), Autosomal recessive
EDA	Ectodysplasin A	300451	Tooth agenesis, selective, X-linked 1, 313500 (3), X-linked dominant; Ectodermal dysplasia 1, hypohidrotic, X-linked, 305100 (3), X-linked recessive
EDAR	Ectodysplasin 1, anhidrotic receptor (downless, mouse, homolog of)	604095	Ectodermal dysplasia 10A, hypohidrotic/hair/nail type, autosomal dominant, 129490 (3), Autosomal dominant; Ectodermal dysplasia 10B, hypohidrotic/hair/tooth type, autosomal recessive, 224900 (3), Autosomal recessive; [Hair morphology 1, hair thickness], 612630 (3)
EDARADD	EDAR-associated death domain	606603	Ectodermal dysplasia 11B, hypohidrotic/hair/tooth type, autosomal recessive, 614941 (3), Autosomal recessive; Ectodermal dysplasia 11A, hypohidrotic/hair/tooth type, autosomal dominant, 614940 (3), Autosomal dominant
EDC3	Enhancer of mRNA decapping 3	609842	?Mental retardation, autosomal recessive 50, 616460 (3), Autosomal recessive
EDN1	Endothelin-1	131240	Auriculocondylar syndrome 3, 615706 (3), Autosomal recessive; {High density lipoprotein cholesterol level QTL 7} (3); Question mark ears, isolated, 612798 (3), Autosomal dominant
EDN3	Endothelin-3	131242	Waardenburg syndrome, type 4B, 613265 (3), Autosomal recessive, Autosomal dominant; Central hypoventilation syndrome, congenital, 209880 (3), Autosomal dominant; {Hirschsprung disease, susceptibility to, 4}, 613712 (3), Autosomal dominant
EDNRA	Endothelin receptor type A	131243	Mandibulofacial dysostosis with alopecia, 616367 (3), Autosomal dominant; {Migraine, resistance to}, 157300 (3), Autosomal dominant
EDNRB	Endothelin receptor type B	131244	{Hirschsprung disease, susceptibility to, 2}, 600155 (3), Autosomal dominant; Waardenburg syndrome, type 4A, 277580 (3), Autosomal recessive, Autosomal dominant; ABCD syndrome, 600501 (3), Autosomal recessive
EED	Embryonic ectoderm development protein	605984	Cohen-Gibson syndrome, 617561 (3), Autosomal dominant
EEF1A2	Eukaryotic translation elongation factor-1, alpha-2	602959	Epileptic encephalopathy, early infantile, 33, 616409 (3), Autosomal dominant; Mental retardation, autosomal dominant 38, 616393 (3), Autosomal dominant
EEF1AKNMT	EEF1A lysine and N-terminal methyltransferase	617987	?{Deafness, autosomal recessive 26, modifier of}, 605429 (3), Autosomal dominant
EEF2	Eukaryotic translation elongation factor-2	130610	?Spinocerebellar ataxia 26, 609306 (3), Autosomal dominant
EFEMP1	EGF-containing fibulin-like extracellular matrix protein 1 (fibrillin-like)	601548	Doyne honeycomb degeneration of retina, 126600 (3), Autosomal dominant
EFEMP2	EGF-containing fibulin-like extracellular matrix protein 2 (fibulin 4)	604633	Cutis laxa, autosomal recessive, type IB, 614437 (3), Autosomal recessive
EFHC1	EF hand domain (C-terminal)-containing 1	608815	{Myoclonic epilepsy, juvenile, susceptibility to, 1}, 254770 (3), Autosomal dominant; {Epilepsy, juvenile absence, susceptibility to, 1}, 607631 (3), Autosomal dominant
EFL1	Elongation factor-like GTPase 1	617538	Shwachman-Diamond syndrome 2, 617941 (3), Autosomal recessive
EFNB1	eph-related receptor tyrosine kinase ligand 2 (ephrin B1)	300035	Craniofrontonasal dysplasia, 304110 (3), X-linked dominant
EFTUD2	Elongation factor Tu GTP-binding domain-containing 2	603892	Mandibulofacial dysostosis, Guion-Almeida type, 610536 (3), Autosomal dominant
EGF	Epidermal growth factor (urogastrone)	131530	Hypomagnesemia 4, renal, 611718 (3)
EGFR	Epidermal growth factor receptor	131550	?Inflammatory skin and bowel disease, neonatal, 2, 616069 (3), Autosomal recessive; Nonsmall cell lung cancer, response to tyrosine kinase inhibitor in, 211980 (3), Autosomal dominant, Somatic mutation; Adenocarcinoma of lung, response to tyrosine kinase inhibitor in, 211980 (3), Autosomal dominant, Somatic mutation; {Nonsmall cell lung cancer, susceptibility to}, 211980 (3), Autosomal dominant, …
EGLN1	egl-9 family hypoxia inducible factor 1	606425	[Hemoglobin, high altitude adaptation], 609070 (3), Autosomal dominant; Erythrocytosis, familial, 3, 609820 (3), Autosomal dominant
EGR2	KROX-20, Drosophila, homolog of (early growth response-2)	129010	Dejerine-Sottas disease, 145900 (3), Autosomal recessive, Autosomal dominant; Hypomyelinating neuropathy, congenital, 1, 605253 (3), Autosomal recessive, Autosomal dominant; Charcot-Marie-Tooth disease, type 1D, 607678 (3), Autosomal dominant
EHBP1	EH domain-binding protein 1	609922	{Prostate cancer, hereditary, 12}, 611868 (3)
EHHADH	Enoyl-Coenzyme A, hydratase/3-hydroxyacyl Coenzyme A dehydrogenase	607037	?Fanconi renotubular syndrome 3, 615605 (3), Autosomal dominant
EHMT1	Euchromatic histone methyltransferase 1	607001	Kleefstra syndrome 1, 610253 (3), Autosomal dominant
EIF2AK3	Eukaryotic translation initiation factor 2-alpha kinase 3	604032	Wolcott-Rallison syndrome, 226980 (3), Autosomal recessive
EIF2AK4	Eukaryotic translation initiation factor 2-alpha kinase 4	609280	Pulmonary venoocclusive disease 2, 234810 (3), Autosomal recessive
EIF2B1	Eukaryotic translation initiation factor 2B, subunit 1	606686	Leukoencephalopathy with vanishing white matter, 603896 (3), Autosomal recessive
EIF2B2	Eukaryotic translation initiation factor 2B, subunit 2	606454	Ovarioleukodystrophy, 603896 (3), Autosomal recessive; Leukoencephalopathy with vanishing white matter, 603896 (3), Autosomal recessive
EIF2B3	Eukaryotic translation initiation factor 2B, subunit 3	606273	Leukoencephalopathy with vanishing white matter, 603896 (3), Autosomal recessive
EIF2B4	Eukaryotic translation initiation factor 2B, subunit 4	606687	Leukoencephalopathy with vanishing white matter, 603896 (3), Autosomal recessive; Ovarioleukodystrophy, 603896 (3), Autosomal recessive
EIF2B5	Eukaryotic translation initiation factor 2B, subunit 5	603945	Leukoencephalopathy with vanishing white matter, 603896 (3), Autosomal recessive; Ovarioleukodystrophy, 603896 (3), Autosomal recessive
EIF2S3	Eukaryotic translation initiation factor 2, subunit 3	300161	MEHMO syndrome, 300148 (3), X-linked recessive
EIF3F	Eukaryotic translation initiation factor 3, subunit F	603914	Mental retardation, autosomal recessive 67, 618295 (3), Autosomal recessive
EIF4A3	Eukaryotic translation initiation factor 4A3	608546	Robin sequence with cleft mandible and limb anomalies, 268305 (3), Autosomal recessive
EIF4E	Eukaryotic translation initiation factor 4E	133440	{Autism, susceptibility to, 19}, 615091 (3)
EIF4G1	Eukaryotic translation initiation factor 4 gamma, 1	600495	{Parkinson disease 18}, 614251 (3), Autosomal dominant
ELAC2	elaC, E. coli, homolog 2	605367	Combined oxidative phosphorylation deficiency 17, 615440 (3), Autosomal recessive; {Prostate cancer, hereditary, 2, susceptibility to}, 614731 (3)
ELANE	Elastase, neutrophil-expressed	130130	Neutropenia, severe congenital 1, autosomal dominant, 202700 (3), Autosomal dominant; Neutropenia, cyclic, 162800 (3), Autosomal dominant
ELMO2	Engulfment and cell motility gene 2	606421	Vascular malformation, primary intraosseous, 606893 (3), Autosomal recessive
ELMOD3	ELMO/CED12 domain-containing protein 3	615427	?Deafness, autosomal recessive 88, 615429 (3), Autosomal recessive
ELN	Elastin	130160	Cutis laxa, autosomal dominant, 123700 (3), Autosomal dominant; Supravalvar aortic stenosis, 185500 (3), Autosomal dominant
ELOVL1	Elongation of very long chain fatty acids-like 1	611813	Ichthyotic keratoderma, spasticity, hypomyelination, and dysmorphic facies, 618527 (3), Autosomal dominant
ELOVL4	Elongation of very long chain fatty acids 4	605512	Spinocerebellar ataxia 34, 133190 (3), Autosomal dominant; Stargardt disease 3, 600110 (3), Autosomal dominant; Ichthyosis, spastic quadriplegia, and mental retardation, 614457 (3), Autosomal recessive
ELOVL5	Elongation of very long chain fatty acids-like 5	611805	Spinocerebellar ataxia 38, 615957 (3), Autosomal dominant
ELP1	Inhibitor of kappa light polypeptide gene enhancer in B cells, kinase complex-associated protein	603722	Dysautonomia, familial, 223900 (3), Autosomal recessive
ELP2	Elongator acetyltransferase complex, subunit 2	616054	Mental retardation, autosomal recessive 58, 617270 (3), Autosomal recessive
ELP4	Elongation protein 4, S. cerevisiae, homolog of	606985	?Aniridia 2, 617141 (3), Autosomal dominant
EMC1	Endoplasmic reticulum membrane protein complex, subunit 1	616846	Cerebellar atrophy, visual impairment, and psychomotor retardation, 616875 (3), Autosomal recessive
EMD	Emerin	300384	Emery-Dreifuss muscular dystrophy 1, X-linked, 310300 (3), X-linked recessive
EMG1	EMG1 N1-specific pseudouridine methyltransferase	611531	Bowen-Conradi syndrome, 211180 (3), Autosomal recessive
EML1	Echinoderm microtubule associated protein like 1	602033	Band heterotopia, 600348 (3), Autosomal recessive
EMP2	Epithelial membrane protein 2	602334	Nephrotic syndrome, type 10, 615861 (3), Autosomal recessive
EMX2	Empty spiracles homeobox 2	600035	Schizencephaly, 269160 (3)
ENAM	Enamelin	606585	Amelogenesis imperfecta, type IC, 204650 (3), Autosomal recessive; Amelogenesis imperfecta, type IB, 104500 (3), Autosomal dominant
ENG	Endoglin	131195	Telangiectasia, hereditary hemorrhagic, type 1, 187300 (3), Autosomal dominant
ENO1	Enolase-1, alpha	172430	Enolase deficiency (1)
ENO3	Enolase-3, beta, muscle	131370	?Glycogen storage disease XIII, 612932 (3), Autosomal recessive
ENPP1	Ectonucleotide pyrophosphatase/phosphodiesterase 1 (Ly-41 antigen, mouse, homolog of)	173335	Hypophosphatemic rickets, autosomal recessive, 2, 613312 (3), Autosomal recessive; Cole disease, 615522 (3), Autosomal dominant; {Obesity, susceptibility to}, 601665 (3), Autosomal recessive, Autosomal dominant, Multifactorial; Arterial calcification, generalized, of infancy, 1, 208000 (3), Autosomal recessive; {Diabetes mellitus, non-insulin-dependent, susceptibility to}, 125853 (3), Autosomal d…
ENTPD1	Ectonucleoside triphosphate diphosphohydrolase 1 (CD39 antigen)	601752	Spastic paraplegia 64, autosomal recessive, 615683 (3), Autosomal recessive
EOGT	EGF domain-specific O-linked N-acetylglucosamine transferase	614789	Adams-Oliver syndrome 4, 615297 (3), Autosomal recessive
EP300	E1A-binding protein, 300kD	602700	Rubinstein-Taybi syndrome 2, 613684 (3), Autosomal dominant; Menke-Hennekam syndrome 2, 618333 (3); Colorectal cancer, somatic, 114500 (3)
EPAS1	Endothelial PAS domain protein 1	603349	Erythrocytosis, familial, 4, 611783 (3)
EPB41	Erythrocyte surface protein band 4.1	130500	Elliptocytosis-1, 611804 (3), Autosomal recessive, Autosomal dominant
EPB41L1	Erythrocyte membrane protein band 4.1-like 1	602879	?Mental retardation, autosomal dominant 11, 614257 (3), Autosomal dominant
EPB42	Erythrocyte surface protein band 4.2	177070	Spherocytosis, type 5, 612690 (3)
EPCAM	Epithelial cellular adhesion molecule	185535	Colorectal cancer, hereditary nonpolyposis, type 8, 613244 (3); Diarrhea 5, with tufting enteropathy, congenital, 613217 (3), Autosomal recessive
EPG5	Ectopic P-granules autophagy protein 5 homolog	615068	Vici syndrome, 242840 (3), Autosomal recessive
EPHA2	Ephrin receptor EphA2	176946	Cataract 6, multiple types, 116600 (3), Autosomal dominant
EPHB2	eph tyrosine kinase 3 (ephrin receptor EphB2)	600997	{Prostate cancer/brain cancer susceptibility, somatic}, 603688 (3); ?Bleeding disorder, platelet-type, 22, 618462 (3), Autosomal recessive
EPHB4	Ephrin receptor EphB4 (hepatoma transmembrane kinase)	600011	Capillary malformation-arteriovenous malformation 2, 618196 (3), Autosomal dominant; Lymphatic malformation 7, 617300 (3), Autosomal dominant
EPHX1	Epoxide hydroxylase 1, microsomal xenobiotic	132810	?Hypercholanemia, familial, 607748 (3), Autosomal recessive
EPHX2	Epoxide hydrolase 2, cytoplasmic	132811	{Hypercholesterolemia, familial, due to LDLR defect, modifier of}, 143890 (3), Autosomal dominant
EPM2A	Laforin	607566	Epilepsy, progressive myoclonic 2A (Lafora), 254780 (3), Autosomal recessive
EPO	Erythropoietin	133170	Erythrocytosis, familial, 5, 617907 (3), Autosomal dominant; {Microvascular complications of diabetes 2}, 612623 (3); ?Diamond-Blackfan anemia-like, 617911 (3), Autosomal recessive
EPOR	Erythropoietin receptor	133171	[Erythrocytosis, familial, 1], 133100 (3), Autosomal dominant
EPRS1	Glutamyl-prolyl-tRNA synthetase	138295	Leukodystrophy, hypomyelinating, 15, 617951 (3), Autosomal recessive
EPS8	Epidermal growth factor receptor pathway substrate-8	600206	?Deafness, autosomal recessive 102, 615974 (3), Autosomal recessive
EPS8L2	EPS8-like protein 2	614988	Deafness autosomal recessive 106, 617637 (3), Autosomal recessive
EPX	Eosinophil peroxidase	131399	[Eosinophil peroxidase deficiency], 261500 (3), Autosomal recessive
ERAL1	ERA G-protein-like 1	607435	Perrault syndrome 6, 617565 (3), Autosomal recessive
ERBB2	Avian erythroblastic leukemia viral (v-erb-b2) oncogene homolog 2 (neuro/glioblastoma derived oncogene homolog)	164870	Glioblastoma, somatic, 137800 (3); Adenocarcinoma of lung, somatic, 211980 (3); Gastric cancer, somatic, 613659 (3); Ovarian cancer, somatic (3)
ERBB3	Transformation gene ERBB-3	190151	{?Erythroleukemia, familial, susceptibility to}, 133180 (3), Autosomal dominant; ?Lethal congenital contractural syndrome 2, 607598 (3), Autosomal recessive
ERBB4	Avian erythroblastic leukemia viral (v-erb-b2) oncogene homolog 4	600543	Amyotrophic lateral sclerosis 19, 615515 (3), Autosomal dominant
ERCC1	Excision repair cross complementing rodent repair deficiency, complementation group-1	126380	Cerebrooculofacioskeletal syndrome 4, 610758 (3), Autosomal recessive
ERCC2	Excision repair cross complementing rodent repair deficiency, complementation group-2	126340	Trichothiodystrophy 1, photosensitive, 601675 (3), Autosomal recessive; ?Cerebrooculofacioskeletal syndrome 2, 610756 (3), Autosomal recessive; Xeroderma pigmentosum, group D, 278730 (3), Autosomal recessive
ERCC3	Excision-repair cross-complementing rodent repair deficiency, complementation group 3	133510	Xeroderma pigmentosum, group B, 610651 (3), Autosomal recessive; Trichothiodystrophy 2, photosensitive, 616390 (3), Autosomal recessive
ERCC4	Excision-repair, complementing defective, in Chinese hamster, number 4	133520	Xeroderma pigmentosum, type F/Cockayne syndrome, 278760 (3), Autosomal recessive; Fanconi anemia, complementation group Q, 615272 (3), Autosomal recessive; XFE progeroid syndrome, 610965 (3), Autosomal recessive; Xeroderma pigmentosum, group F, 278760 (3), Autosomal recessive
ERCC5	Excision-repair, complementing defective, in Chinese hamster, number 5	133530	Xeroderma pigmentosum, group G/Cockayne syndrome, 278780 (3), Autosomal recessive; Xeroderma pigmentosum, group G, 278780 (3), Autosomal recessive; Cerebrooculofacioskeletal syndrome 3, 616570 (3), Autosomal recessive
ERCC6	Excision repair cross complementing rodent repair deficiency, complementation group 6	609413	{Macular degeneration, age-related, susceptibility to, 5}, 613761 (3); {Lung cancer, susceptibility to}, 211980 (3), Autosomal dominant, Somatic mutation; Cerebrooculofacioskeletal syndrome 1, 214150 (3), Autosomal recessive; Cockayne syndrome, type B, 133540 (3), Autosomal recessive; Premature ovarian failure 11, 616946 (3), Autosomal dominant; UV-sensitive syndrome 1, 600630 (3), Autosomal rece…
ERCC6L2	ERCC6-like 2	615667	Bone marrow failure syndrome 2, 615715 (3), Autosomal recessive
ERCC8	Excision repair cross-complementing rodent repair deficiency, complementation group 8	609412	Cockayne syndrome, type A, 216400 (3), Autosomal recessive; UV-sensitive syndrome 2, 614621 (3), Autosomal recessive
ERF	ETS2 repressor factor	611888	Craniosynostosis 4, 600775 (3), Autosomal dominant; Chitayat syndrome, 617180 (3), Autosomal dominant
ERGIC1	Endoplasmic reticulum-golgi intermediate compartment protein 1	617946	?Arthrogryposis multiplex congenita, neurogenic type, 208100 (3), Autosomal recessive
ERLIN1	Endoplasmic reticulum lipid raft-associated protein 1	611604	Spastic paraplegia 62, 615681 (3), Autosomal recessive
ERLIN2	Endoplasmic reticulum lipid raft-associated protein 2	611605	Spastic paraplegia 18, autosomal recessive, 611225 (3), Autosomal recessive
ERMAP	Erythroblast membrane-associated protein	609017	[Blood group, Scianna system], 111750 (3); [Blood group, Radin], 111620 (3)
ERMARD	Endoplasmic reticulum membrane-associated RNA degradation protein	615532	?Periventricular nodular heterotopia 6, 615544 (3), Autosomal dominant
ESCO2	Establishment of cohesion 1, S. cerevisiae, homolog of, 2	609353	Roberts syndrome, 268300 (3), Autosomal recessive; SC phocomelia syndrome, 269000 (3), Autosomal recessive
ESPN	Espin	606351	?Usher syndrome, type 1M, 618632 (3), Autosomal recessive; Deafness, autosomal recessive 36, 609006 (3), Autosomal recessive; Deafness, neurosensory, without vestibular involvement, autosomal dominant, 609006 (3), Autosomal recessive
ESR1	Estrogen receptor 1	133430	{Myocardial infarction, susceptibility to}, 608446 (3); Estrogen resistance, 615363 (3), Autosomal recessive; Breast cancer, somatic, 114480 (3); {Migraine, susceptibility to}, 157300 (3), Autosomal dominant
ESR2	Estrogen receptor-2 (ER beta)	601663	?Ovarian dysgenesis 8, 618187 (3), Autosomal dominant
ESRP1	Epithelial splicing regulatory protein 1	612959	?Deafness, autosomal recessive 109, 618013 (3), Autosomal recessive
ESRRB	Estrogen-related receptor beta	602167	Deafness, autosomal recessive 35, 608565 (3), Autosomal recessive
ETFA	Electron transfer flavoprotein, alpha polypeptide	608053	Glutaric acidemia IIA, 231680 (3), Autosomal recessive
ETFB	Electron transfer flavoprotein, beta polypeptide	130410	Glutaric acidemia IIB, 231680 (3), Autosomal recessive
ETFDH	Electron transfer flavoprotein:ubiquinone oxidoreductase	231675	Glutaric acidemia IIC, 231680 (3), Autosomal recessive
ETHE1	ETHE1 gene	608451	Ethylmalonic encephalopathy, 602473 (3), Autosomal recessive
ETV6	ETS variant gene-6 (TEL oncogene)	600618	Leukemia, acute myeloid, somatic, 601626 (3); Thrombocytopenia 5, 616216 (3), Autosomal dominant
EVC	EvC ciliary complex subunit 1	604831	Ellis-van Creveld syndrome, 225500 (3), Autosomal recessive; ?Weyers acrofacial dysostosis, 193530 (3), Autosomal dominant
EVC2	EvC ciliary complex subunit 2 (limbin)	607261	Weyers acrofacial dysostosis, 193530 (3), Autosomal dominant; Ellis-van Creveld syndrome, 225500 (3), Autosomal recessive
EWSR1	Ewing sarcoma breakpoint region-1	133450	Neuroepithelioma, 612219 (3); Ewing sarcoma, 612219 (3)
EXOC6B	Exocyst complex component 6B	607880	Spondyloepimetaphyseal dysplasia with joint laxity, type 3, 618395 (3), Autosomal recessive
EXOSC2	Exosome component 2	602238	Short stature, hearing loss, retinitis pigmentosa, and distinctive facies, 617763 (3), Autosomal recessive
EXOSC3	Exosome component 3	606489	Pontocerebellar hypoplasia, type 1B, 614678 (3), Autosomal recessive
EXOSC8	Exosome component 8	606019	Pontocerebellar hypoplasia, type 1C, 616081 (3), Autosomal recessive
EXOSC9	Exosome component 9	606180	Pontocerebellar hypoplasia, type 1D, 618065 (3), Autosomal recessive
EXPH5	Exophilin 5	612878	Epidermolysis bullosa, nonspecific, autosomal recessive, 615028 (3), Autosomal recessive
EXT1	Exostosin 1	608177	Exostoses, multiple, type 1, 133700 (3), Autosomal dominant; Chondrosarcoma, 215300 (3), Autosomal recessive
EXT2	Exostosin glycosyltransferase 2	608210	Seizures, scoliosis, and macrocephaly syndrome, 616682 (3), Autosomal recessive; Exostoses, multiple, type 2, 133701 (3), Autosomal dominant
EXTL3	Exostosin-like 3	605744	Immunoskeletal dysplasia with neurodevelopmental abnormalities, 617425 (3), Autosomal recessive
EYA1	Eyes absent, Drosophila, homolog of, 1	601653	?Otofaciocervical syndrome, 166780 (3), Autosomal dominant; Anterior segment anomalies with or without cataract, 602588 (3), Autosomal dominant; Branchiootorenal syndrome 1, with or without cataracts, 113650 (3), Autosomal dominant; Branchiootic syndrome 1, 602588 (3), Autosomal dominant
EYA4	EYA transcriptional coactivator and phosphatase 4	603550	Deafness, autosomal dominant 10, 601316 (3), Autosomal dominant; ?Cardiomyopathy, dilated, 1J, 605362 (3), Autosomal dominant
EYS	Eyes shut, Drosophila, homolog of	612424	Retinitis pigmentosa 25, 602772 (3), Autosomal recessive
EZH2	Enhancer of zeste, Drosophila, homolog of, 2	601573	Weaver syndrome, 277590 (3), Autosomal dominant
F10	Coagulation factor X	613872	Factor X deficiency, 227600 (3), Autosomal recessive
F11	Coagulation factor XI (plasma thromboplastin antecedent)	264900	Factor XI deficiency, autosomal dominant, 612416 (3); Factor XI deficiency, autosomal recessive, 612416 (3)
F12	Coagulation factor XII (Hageman factor)	610619	Factor XII deficiency, 234000 (3), Autosomal recessive; Angioedema, hereditary, type III, 610618 (3), Autosomal dominant
F13A1	Coagulation factor XIII, A polypeptide	134570	{Myocardial infarction, protection against}, 608446 (3); Factor XIIIA deficiency, 613225 (3), Autosomal recessive; {Venous thrombosis, protection against}, 188050 (3), Autosomal dominant
F13B	Coagulation factor XIII, B polypeptide	134580	Factor XIIIB deficiency, 613235 (3), Autosomal recessive
F2	Coagulation factor II (thrombin)	176930	{Pregnancy loss, recurrent, susceptibility to, 2}, 614390 (3), Autosomal dominant; Hypoprothrombinemia, 613679 (3), Autosomal recessive; Dysprothrombinemia, 613679 (3), Autosomal recessive; Thrombophilia due to thrombin defect, 188050 (3), Autosomal dominant; {Stroke, ischemic, susceptibility to}, 601367 (3), Multifactorial
F5	Coagulation factor V (proaccelerin, labile factor)	612309	{Pregnancy loss, recurrent, susceptibility to, 1}, 614389 (3), Autosomal dominant; Thrombophilia due to activated protein C resistance, 188055 (3), Autosomal dominant; {Thrombophilia, susceptibility to, due to factor V Leiden}, 188055 (3), Autosomal dominant; Factor V deficiency, 227400 (3), Autosomal recessive; {Budd-Chiari syndrome}, 600880 (3), Autosomal recessive; {Stroke, ischemic, susceptib…
F7	Coagulation factor VII	613878	{Myocardial infarction, decreased susceptibility to}, 608446 (3); Factor VII deficiency, 227500 (3), Autosomal recessive
F8	Coagulation factor VIII, procoagulant component	300841	Hemophilia A, 306700 (3), X-linked recessive
F9	Coagulation factor IX (plasma thromboplastic component)	300746	Thrombophilia, X-linked, due to factor IX defect, 300807 (3); {Deep venous thrombosis, protection against}, 300807 (3); Hemophilia B, 306900 (3), X-linked recessive; {Warfarin sensitivity}, 122700 (3), Autosomal dominant
FA2H	Fatty acid 2-hydroxylase	611026	Spastic paraplegia 35, autosomal recessive, 612319 (3), Autosomal recessive
FAAH	Fatty acid amide hydrolase	602935	{Drug addiction, susceptibility to}, 606581 (3)
FADD	FAS-associating protein with death domain	602457	Infections, recurrent, with encephalopathy, hepatic dysfunction, and cardiovascular malformations, 613759 (3), Autosomal recessive
FAH	Fumarylacetoacetase	613871	Tyrosinemia, type I, 276700 (3), Autosomal recessive
FAM111A	Family with sequence similarity 111, member A	615292	Gracile bone dysplasia, 602361 (3), Autosomal dominant; Kenny-Caffey syndrome, type 2, 127000 (3), Autosomal dominant
FAM111B	Family with sequence similarity 111, member B	615584	Poikiloderma, hereditary fibrosing, with tendon contractures, myopathy, and pulmonary fibrosis, 615704 (3), Autosomal dominant
FAM126A	Hyccin	610531	Leukodystrophy, hypomyelinating, 5, 610532 (3), Autosomal recessive
FAM161A	Family with sequence similarity 161, member A	613596	Retinitis pigmentosa 28, 606068 (3)
FAM20A	Family with sequence similarity 20, member A	611062	Amelogenesis imperfecta, type IG (enamel-renal syndrome), 204690 (3), Autosomal recessive
FAM20C	Family with sequence similarity 20, member C	611061	Raine syndrome, 259775 (3), Autosomal recessive
FAM83H	Family with sequence similarity 83, member H	611927	Amelogenesis imperfecta, type IIIA, 130900 (3), Autosomal dominant
FAM92A	Family with sequence similarity 92, member A	617273	?Polydactyly, postaxial, type A9, 618219 (3), Autosomal recessive
FAN1	FANCD2/FANCI-associated nuclease 1	613534	Interstitial nephritis, karyomegalic, 614817 (3), Autosomal recessive
FANCA	Fanconi anemia, complementation group A	607139	Fanconi anemia, complementation group A, 227650 (3), Autosomal recessive
FANCB	Fanconi anemia, complementation group B gene	300515	Fanconi anemia, complementation group B, 300514 (3), X-linked recessive
FANCC	Fanconi anemia, complementation group C	613899	Fanconi anemia, complementation group C, 227645 (3), Autosomal recessive
FANCD2	Fanconi anemia, complementation group D2	613984	Fanconi anemia, complementation group D2, 227646 (3), Autosomal recessive
FANCE	Fanconi anemia, complementation group E gene	613976	Fanconi anemia, complementation group E, 600901 (3), Autosomal recessive
FANCF	Fanconi anemia, complementation group F	613897	Fanconi anemia, complementation group F, 603467 (3)
FANCG	X-ray repair, complementing defective, in Chinese hamster, 9	602956	Fanconi anemia, complementation group G, 614082 (3)
FANCI	FANCI gene	611360	Fanconi anemia, complementation group I, 609053 (3), Autosomal recessive
FANCL	PHD finger protein 9	608111	Fanconi anemia, complementation group L, 614083 (3), Autosomal recessive
FANCM	FANCM gene	609644	Spermatogenic failure 28, 618086 (3), Autosomal recessive; ?Premature ovarian failure 15, 618096 (3), Autosomal recessive
FAR1	Fatty acyl CoA reductase 1	616107	Peroxisomal fatty acyl-CoA reductase 1 disorder, 616154 (3), Autosomal recessive
FARS2	Phenylalanyl-tRNA synthetase 2, mitochondrial	611592	Spastic paraplegia 77, autosomal recessive, 617046 (3), Autosomal recessive; Combined oxidative phosphorylation deficiency 14, 614946 (3), Autosomal recessive
FARSB	Phenylalanine-tRNA synthetase-like, beta subunit	609690	Rajab interstitial lung disease with brain calcifications, 613658 (3), Autosomal recessive
FAS	Fas cell surface death receptor	134637	Autoimmune lymphoproliferative syndrome, type IA, 601859 (3), Autosomal dominant; Squamous cell carcinoma, burn scar-related, somatic (3); {Autoimmune lymphoproliferative syndrome}, 601859 (3), Autosomal dominant
FASLG	Fas ligand (TNF superfamily, member 6)	134638	Autoimmune lymphoproliferative syndrome, type IB, 601859 (3), Autosomal dominant; {Lung cancer, susceptibility to}, 211980 (3), Autosomal dominant, Somatic mutation
FASTKD2	FAST kinase domains 2	612322	?Mitochondrial complex IV deficiency, 220110 (3), Autosomal recessive, Mitochondrial
FAT2	FAT atypical cadherin 2	604269	Spinocerebellar ataxia 45, 617769 (3), Autosomal dominant
FAT4	FAT atypical cadherin 4	612411	Van Maldergem syndrome 2, 615546 (3), Autosomal recessive; Hennekam lymphangiectasia-lymphedema syndrome 2, 616006 (3), Autosomal recessive
FBLN1	Fibulin 1	135820	Synpolydactyly, 3/3'4, associated with metacarpal and metatarsal synostoses, 608180 (4), Autosomal dominant
FBLN5	Fibulin 5	604580	Macular degeneration, age-related, 3, 608895 (3), Autosomal dominant; ?Cutis laxa, autosomal dominant 2, 614434 (3), Autosomal dominant; Neuropathy, hereditary, with or without age-related macular degeneration, 608895 (3), Autosomal dominant; Cutis laxa, autosomal recessive, type IA, 219100 (3), Autosomal recessive
FBN1	Fibrillin-1	134797	Marfan lipodystrophy syndrome, 616914 (3), Autosomal dominant; Marfan syndrome, 154700 (3), Autosomal dominant; MASS syndrome, 604308 (3), Autosomal dominant; Ectopia lentis, familial, 129600 (3), Autosomal dominant; Acromicric dysplasia, 102370 (3), Autosomal dominant; Weill-Marchesani syndrome 2, dominant, 608328 (3), Autosomal dominant; Geleophysic dysplasia 2, 614185 (3), Autosomal dominant; …
FBN2	Fibrillin-2	612570	Contractural arachnodactyly, congenital, 121050 (3), Autosomal dominant; Macular degeneration, early-onset, 616118 (3), Autosomal dominant
FBP1	Fructose-bisphosphatase 1	611570	Fructose-1,6-bisphosphatase deficiency, 229700 (3), Autosomal recessive
FBXL3	F-box and leucine-rich repeat protein 3	605653	Intellectual developmental disorder with short stature, facial anomalies, and speech defects, 606220 (3), Autosomal recessive
FBXL4	F-box and leucine-rich repeat protein 4	605654	Mitochondrial DNA depletion syndrome 13 (encephalomyopathic type), 615471 (3), Autosomal recessive
FBXO11	F-box only protein 11	607871	Intellectual developmental disorder with dysmorphic facies and behavioral abnormalities, 618089 (3), Autosomal dominant
FBXO31	F-box only protein 31	609102	?Mental retardation, autosomal recessive 45, 615979 (3), Autosomal recessive
FBXO38	F-box only protein 38	608533	Neuronopathy, distal hereditary motor, type IID, 615575 (3), Autosomal dominant
FBXO7	F-box only protein 7	605648	Parkinson disease 15, autosomal recessive, 260300 (3), Autosomal recessive
FCGR1A	Fc fragment of IgG, high affinity Ia, receptor for (CD64)	146760	[IgG receptor I, phagocytic, familial deficiency of] (3)
FCGR2A	Fc fragment of IgG, low affinity IIa, receptor for (CD32)	146790	{Pseudomonas aeruginosa, susceptibility to chronic infection by, in cystic fibrosis}, 219700 (3), Autosomal recessive; {Lupus nephritis, susceptibility to}, 152700 (3), Autosomal dominant; {Malaria, severe, susceptibility to}, 611162 (3)
FCGR2B	Fc fragment of IgG, low affinity IIb, receptor for	604590	{Malaria, resistance to}, 611162 (3); {Systemic lupus erythematosus, susceptibility to}, 152700 (3), Autosomal dominant
FCGR2C	Fc fragment of IgG, low affinity IIc, receptor for	612169	Thrombocytopenic purpura, autoimmune, 188030 (1), Autosomal dominant
FCGR3A	Fc fragment of IgG, low affinity III, receptor for (CD16)	146740	Immunodeficiency 20, 615707 (3), Autosomal recessive
FCGR3B	Fc fragment of IgG, low affinity IIIb, receptor for	610665	Neutropenia, alloimmune neonatal (3)
FCN3	Ficolin 3	604973	Immunodeficiency due to ficolin 3 deficiency, 613860 (3), Autosomal recessive
FCSK	Fucose kinase	608675	Congenital disorder of glycosylation with defective fucosylation 2, 618324 (3), Autosomal recessive
FDFT1	Farnesyl-diphosphate farnesyltransferase 1 (squalene synthase)	184420	Squalene synthase deficiency, 618156 (3), Autosomal recessive
FDPS	Farnesyl diphosphate synthase	134629	Porokeratosis 9, multiple types, 616631 (3), Autosomal dominant
FDX2	Ferredoxin 2	614585	Mitochondrial myopathy, episodic, with optic atrophy and reversible leukoencephalopathy, 251900 (3), Autosomal recessive
FDXR	Ferredoxin reductase (adrenodoxin reductase)	103270	Auditory neuropathy and optic atrophy, 617717 (3), Autosomal recessive
FECH	Ferrochelatase	612386	Protoporphyria, erythropoietic, 1, 177000 (3), Autosomal recessive
FERMT1	Fermitin family, member 1	607900	Kindler syndrome, 173650 (3), Autosomal recessive
FERMT3	Fermitin family, member 3	607901	Leukocyte adhesion deficiency, type III, 612840 (3), Autosomal recessive
FEZF1	FEZ family zinc finger protein 1	613301	Hypogonadotropic hypogonadism 22, with or without anosmia, 616030 (3), Autosomal recessive
FFAR4	Free fatty acid receptor 4	609044	{Obesity, susceptibility to}, 607514 (3)
FGA	Fibrinogen, alpha polypeptide	134820	Dysfibrinogenemia, congenital, 616004 (3); Amyloidosis, familial visceral, 105200 (3), Autosomal dominant; Hypodysfibrinogenemia, congenital, 616004 (3); Afibrinogenemia, congenital, 202400 (3), Autosomal recessive
FGB	Fibrinogen, beta polypeptide	134830	Dysfibrinogenemia, congenital, 616004 (3); Afibrinogenemia, congenital, 202400 (3), Autosomal recessive; Hypofibrinogenemia, congenital, 202400 (3), Autosomal recessive
FGD1	FYVE, RhoGEF, and PH domain-containing protein 1	300546	Mental retardation, X-linked syndromic 16, 305400 (3), X-linked recessive; Aarskog-Scott syndrome, 305400 (3), X-linked recessive
FGD4	FYVE, RhoGEF, and PH domain-containing protein 4	611104	Charcot-Marie-Tooth disease, type 4H, 609311 (3), Autosomal recessive
FGF10	Fibroblast growth factor-10	602115	Aplasia of lacrimal and salivary glands, 180920 (3), Autosomal dominant; LADD syndrome, 149730 (3), Autosomal dominant
FGF12	Fibroblast growth factor-12	601513	Epileptic encephalopathy, early infantile, 47, 617166 (3), Autosomal dominant
FGF14	Fibroblast growth factor-14	601515	Spinocerebellar ataxia 27, 609307 (3), Autosomal dominant
FGF16	Fibroblast growth factor 16	300827	Metacarpal 4-5 fusion, 309630 (3), X-linked recessive
FGF17	Fibroblast growth factor 17	603725	Hypogonadotropic hypogonadism 20 with or without anosmia, 615270 (3), Autosomal dominant
FGF20	Fibroblast growth factor-20	605558	?Renal hypodysplasia/aplasia 2, 615721 (3), Autosomal recessive
FGF23	Fibroblast growth factor 23	605380	Tumoral calcinosis, hyperphosphatemic, familial, 2, 617993 (3); Osteomalacia, tumor-induced (1); Hypophosphatemic rickets, autosomal dominant, 193100 (3), Autosomal dominant
FGF3	Fibroblast growth factor-3 (oncogene INT2)	164950	Deafness, congenital with inner ear agenesis, microtia, and microdontia, 610706 (3), Autosomal recessive
FGF5	Fibroblast growth factor-5	165190	Trichomegaly, 190330 (3), Autosomal recessive
FGF8	Fibroblast growth factor-8	600483	Hypogonadotropic hypogonadism 6 with or without anosmia, 612702 (3), Autosomal dominant
FGF9	Fibroblast growth factor-9 (glia-activating factor)	600921	Multiple synostoses syndrome 3, 612961 (3), Autosomal dominant
FGFR1	Fibroblast growth factor receptor-1 (fms-related tyrosine kinase-2)	136350	Pfeiffer syndrome, 101600 (3), Autosomal dominant; Jackson-Weiss syndrome, 123150 (3), Autosomal dominant; Trigonocephaly 1, 190440 (3), Autosomal dominant; Hypogonadotropic hypogonadism 2 with or without anosmia, 147950 (3), Autosomal dominant; Hartsfield syndrome, 615465 (3), Autosomal dominant; Osteoglophonic dysplasia, 166250 (3), Autosomal dominant; Encephalocraniocutaneous lipomatosis, soma…
FGFR1OP	Fibroblast growth factor receptor-1 oncogene partner	605392	Myeloproliferative disorder, 605392 (2)
FGFR2	Fibroblast growth factor receptor-2 (bacteria-expressed kinase)	176943	Apert syndrome, 101200 (3), Autosomal dominant; Craniosynostosis, nonspecific (3); Jackson-Weiss syndrome, 123150 (3), Autosomal dominant; Scaphocephaly and Axenfeld-Rieger anomaly (3); Saethre-Chotzen syndrome, 101400 (3), Autosomal dominant; Gastric cancer, somatic, 613659 (3); Scaphocephaly, maxillary retrusion, and mental retardation, 609579 (3); Bent bone dysplasia syndrome, 614592 (3), Auto…
FGFR3	Fibroblast growth factor receptor-3	134934	Muenke syndrome, 602849 (3), Autosomal dominant; Nevus, epidermal, somatic, 162900 (3); Thanatophoric dysplasia, type II, 187601 (3), Autosomal dominant; Bladder cancer, somatic, 109800 (3); CATSHL syndrome, 610474 (3), Autosomal recessive, Autosomal dominant; Crouzon syndrome with acanthosis nigricans, 612247 (3), Autosomal dominant; Hypochondroplasia, 146000 (3), Autosomal dominant; LADD syndro…
FGFR4	Fibroblast growth factor receptor-4	134935	{Cancer progression/metastasis} (3)
FGG	Fibrinogen, gamma polypeptide	134850	Hypofibrinogenemia, congenital, 202400 (3), Autosomal recessive; Hypodysfibrinogenemia, 616004 (3); Dysfibrinogenemia, congenital, 616004 (3); Afibrinogenemia, congenital, 202400 (3), Autosomal recessive
FH	Fumarate hydratase	136850	Fumarase deficiency, 606812 (3), Autosomal recessive; Leiomyomatosis and renal cell cancer, 150800 (3), Autosomal dominant
FHL1	Four-and-a-half LIM domains 1	300163	Reducing body myopathy, X-linked 1a, severe, infantile or early childhood onset, 300717 (3), X-linked dominant; Scapuloperoneal myopathy, X-linked dominant, 300695 (3), X-linked dominant; Reducing body myopathy, X-linked 1b, with late childhood or adult onset, 300718 (3), X-linked; ?Uruguay faciocardiomusculoskeletal syndrome, 300280 (3), X-linked recessive; Emery-Dreifuss muscular dystrophy 6, X…
FIBP	Fibroblast growth factor, acidic, intracellular binding protein	608296	Thauvin-Robinet-Faivre syndrome, 617107 (3), Autosomal recessive
FIG4	FIG4 phosphoinositide 5-phosphatase	609390	Yunis-Varon syndrome, 216340 (3), Autosomal recessive; ?Polymicrogyria, bilateral temporooccipital, 612691 (3), Autosomal recessive; Charcot-Marie-Tooth disease, type 4J, 611228 (3), Autosomal recessive; Amyotrophic lateral sclerosis 11, 612577 (3), Autosomal dominant
FIGLA	Folliculogenesis specific bHLH transcription factor	608697	Premature ovarian failure 6, 612310 (3), Autosomal dominant
FITM2	Fat-inducing transcript 2	612029	Siddiqi syndrome, 618635 (3), Autosomal recessive
FKBP10	FK506-binding protein 10	607063	Bruck syndrome 1, 259450 (3), Autosomal recessive; Osteogenesis imperfecta, type XI, 610968 (3), Autosomal recessive
FKBP14	FK506-binding protein 14	614505	Ehlers-Danlos syndrome, kyphoscoliotic type, 2, 614557 (3), Autosomal recessive
FKBP5	FK506-binding protein 5	602623	{Major depressive disorder and accelerated response to antidepressant drug treatment}, 608516 (3)
FKRP	Fukutin-related protein	606596	Muscular dystrophy-dystroglycanopathy (limb-girdle), type C, 5, 607155 (3), Autosomal recessive; Muscular dystrophy-dystroglycanopathy (congenital with or without mental retardation), type B, 5, 606612 (3), Autosomal recessive; Muscular dystrophy-dystroglycanopathy (congenital with brain and eye anomalies), type A, 5, 613153 (3), Autosomal recessive
FKTN	Fukutin	607440	Muscular dystrophy-dystroglycanopathy (limb-girdle), type C, 4, 611588 (3), Autosomal recessive; Cardiomyopathy, dilated, 1X, 611615 (3), Autosomal recessive; Muscular dystrophy-dystroglycanopathy (congenital without mental retardation), type B, 4, 613152 (3), Autosomal recessive; Muscular dystrophy-dystroglycanopathy (congenital with brain and eye anomalies), type A, 4, 253800 (3), Autosomal rec…
FLAD1	Flavin adenine dinucleotide synthetase 1	610595	Lipid storage myopathy due to flavin adenine dinucleotide synthetase deficiency, 255100 (3), Autosomal recessive
FLCN	Folliculin	607273	Pneumothorax, primary spontaneous, 173600 (3), Autosomal dominant; Renal carcinoma, chromophobe, somatic, 144700 (3); Birt-Hogg-Dube syndrome, 135150 (3), Autosomal dominant; Colorectal cancer, somatic, 114500 (3)
FLG	Filaggrin	135940	{Dermatitis, atopic, susceptibility to, 2}, 605803 (3); Ichthyosis vulgaris, 146700 (3), Autosomal dominant
FLG2	Filaggrin family, member 2	616284	Peeling skin syndrome 6, 618084 (3), Autosomal recessive
FLI1	Friend leukemia virus integration 1	193067	Bleeding disorder, platelet-type, 21, 617443 (3), Autosomal recessive, Autosomal dominant
FLNA	Filamin A, alpha (actin-binding protein-280)	300017	Otopalatodigital syndrome, type I, 311300 (3), X-linked dominant; Congenital short bowel syndrome, 300048 (3), X-linked recessive; Otopalatodigital syndrome, type II, 304120 (3), X-linked dominant; Intestinal pseudoobstruction, neuronal, 300048 (3), X-linked recessive; Melnick-Needles syndrome, 309350 (3), X-linked dominant; Cardiac valvular dysplasia, X-linked, 314400 (3), X-linked; ?FG syndrome…
FLNB	Filamin B	603381	Larsen syndrome, 150250 (3), Autosomal dominant; Atelosteogenesis, type I, 108720 (3), Autosomal dominant; Boomerang dysplasia, 112310 (3), Autosomal dominant; Spondylocarpotarsal synostosis syndrome, 272460 (3), Autosomal recessive; Atelosteogenesis, type III, 108721 (3), Autosomal dominant
FLNC	Filamin C (actin-binding protein-280)	102565	Cardiomyopathy, familial hypertrophic, 26 (3); Myopathy, myofibrillar, 5, 609524 (3), Autosomal dominant; Cardiomyopathy, familial restrictive 5, 617047 (3), Autosomal dominant; Myopathy, distal, 4, 614065 (3), Autosomal dominant
FLRT3	Fibronectin-like domain-containing leucine-rich transmembrane protein-3	604808	Hypogonadotropic hypogonadism 21 with anosmia, 615271 (3), Autosomal dominant
FLT3	fms-related tyrosine kinase-3	136351	Leukemia, acute myeloid, somatic, 601626 (3); Leukemia, acute lymphoblastic, somatic, 613065 (3); Leukemia, acute myeloid, reduced survival in, somatic, 601626 (3)
FLT4	fms-related tyrosine kinase-4 (vascular endothelial growth factor receptor 3)	136352	Hemangioma, capillary infantile, somatic, 602089 (3); Lymphatic malformation 1, 153100 (3), Autosomal dominant
FLVCR1	Feline leukemia virus subgroup C receptor 1	609144	Ataxia, posterior column, with retinitis pigmentosa, 609033 (3), Autosomal recessive
FLVCR2	Feline leukemia virus subgroup C receptor 2	610865	Proliferative vasculopathy and hydranencephaly-hydrocephaly syndrome, 225790 (3), Autosomal recessive
FMN2	Formin 2	606373	Mental retardation, autosomal recessive 47, 616193 (3), Autosomal recessive
FMO3	Flavin-containing monooxygenase 3	136132	Trimethylaminuria, 602079 (3), Autosomal recessive
FMR1	FMRP translational regulator 1	309550	Premature ovarian failure 1, 311360 (3), X-linked; Fragile X tremor/ataxia syndrome, 300623 (3), X-linked dominant; Fragile X syndrome, 300624 (3), X-linked dominant
FN1	Fibronectin-1	135600	Glomerulopathy with fibronectin deposits 2, 601894 (3), Autosomal dominant; Spondylometaphyseal dysplasia, corner fracture type, 184255 (3), Autosomal dominant; Plasma fibronectin deficiency, 614101 (1), Autosomal dominant
FOLR1	Folate receptor-1, adult	136430	Neurodegeneration due to cerebral folate transport deficiency, 613068 (3), Autosomal recessive
FOXC1	Forkhead, Drosophila, homolog-like 7	601090	Axenfeld-Rieger syndrome, type 3, 602482 (3), Autosomal dominant; Anterior segment dysgenesis 3, multiple subtypes, 601631 (3), Autosomal dominant
FOXC2	Forkhead box C2	602402	Lymphedema-distichiasis syndrome, 153400 (3), Autosomal dominant; Lymphedema-distichiasis syndrome with renal disease and diabetes mellitus, 153400 (3), Autosomal dominant
FOXD3	Forkhead box D3	611539	{Autoimmune disease, susceptibility to, 1}, 607836 (3), Autosomal dominant
FOXE1	Forkhead box E1 (thyroid transcription factor-2)	602617	Bamforth-Lazarus syndrome, 241850 (3), Autosomal recessive; {Thyroid cancer, nonmedullary, 4}, 616534 (3), Autosomal dominant
FOXE3	Forkhead box E3	601094	Cataract 34, multiple types, 612968 (3); Anterior segment dysgenesis 2, multiple subtypes, 610256 (3), Autosomal recessive; {Aortic aneurysm, familial thoracic 11, susceptibility to}, 617349 (3), Autosomal dominant
FOXF1	Forkhead box F1	601089	Alveolar capillary dysplasia with misalignment of pulmonary veins, 265380 (3), Autosomal dominant
FOXG1	Forkhead box G1B	164874	Rett syndrome, congenital variant, 613454 (3), Autosomal dominant
FOXI1	Forkhead box I1	601093	Enlarged vestibular aqueduct, 600791 (3), Autosomal recessive
FOXL2	Forkhead transcription factor FOXL2	605597	Blepharophimosis, epicanthus inversus, and ptosis, type 2, 110100 (3), Autosomal dominant; Premature ovarian failure 3, 608996 (3), Autosomal dominant; Blepharophimosis, epicanthus inversus, and ptosis, type 1, 110100 (3), Autosomal dominant
FOXN1	Forkhead box N1 (winged helix nude)	600838	T-cell immunodeficiency, congenital alopecia, and nail dystrophy, 601705 (3), Autosomal recessive
FOXO1	Forkhead box O1A (forkhead in rhabdomyosarcoma)	136533	Rhabdomyosarcoma, alveolar, 268220 (3), Somatic mutation
FOXP1	Forkhead box P1	605515	Mental retardation with language impairment and with or without autistic features, 613670 (3), Autosomal dominant
FOXP2	Forkhead box P2	605317	Speech-language disorder-1, 602081 (3), Autosomal dominant
FOXP3	Forkhead box P3 (scurfin)	300292	Immunodysregulation, polyendocrinopathy, and enteropathy, X-linked, 304790 (3), X-linked recessive
FOXRED1	FAD-dependent oxidoreductase domain-containing protein 1	613622	Mitochondrial complex I deficiency, nuclear type 19, 618241 (3), Autosomal recessive
FRAS1	FRAS1 gene	607830	Fraser syndrome 1, 219000 (3), Autosomal recessive
FREM1	FRAS1-related extracellular matrix protein 1	608944	Manitoba oculotrichoanal syndrome, 248450 (3), Autosomal recessive; Trigonocephaly 2, 614485 (3), Autosomal dominant; Bifid nose with or without anorectal and renal anomalies, 608980 (3)
FREM2	FRAS1-related extracellular matrix protein 2	608945	Fraser syndrome 2, 617666 (3), Autosomal recessive; Cryptophthalmos, unilateral or bilateral, isolated, 123570 (3), Autosomal recessive
FRMD4A	FERM domain-containing protein 4A	616305	?Corpus callosum, agenesis of, with facial anomalies and cerebellar ataxia, 616819 (3), Autosomal recessive
FRMD7	FERM domain-containing 7	300628	Nystagmus 1, congenital, X-linked, 310700 (3), X-linked; Nystagmus, infantile periodic alternating, X-linked, 310700 (3), X-linked
FRMPD4	FERM and PDZ domains-containing protein 4	300838	Mental retardation, X-linked 104, 300983 (3), X-linked
FRRS1L	Ferric-chelate reductase 1-like	604574	Epileptic encephalopathy, early infantile, 37, 616981 (3), Autosomal recessive
FRZB	Frizzled-related protein	605083	{Osteoarthritis susceptibility 1}, 165720 (3), Multifactorial
FSCN2	Fascin, sea urchin, homolog of, 2	607643	Retinitis pigmentosa 30, 607921 (3)
FSHB	Follicle-stimulating hormone, beta polypeptide	136530	Hypogonadotropic hypogonadism 24 without anosmia, 229070 (3), Autosomal recessive
FSHR	Follicle stimulating hormone receptor	136435	Ovarian hyperstimulation syndrome, 608115 (3), Autosomal dominant; Ovarian dysgenesis 1, 233300 (3), Autosomal recessive; Ovarian response to FSH stimulation, 276400 (3), Autosomal recessive
FSIP2	Fibrous sheath-interacting protein 2	615796	Spermatogenic failure 34, 618153 (3), Autosomal recessive
FTCD	Formiminotransferase cyclodeminase	606806	Glutamate formiminotransferase deficiency, 229100 (3), Autosomal recessive
FTH1	Ferritin, heavy polypeptide 1	134770	?Hemochromatosis, type 5, 615517 (3), Autosomal dominant
FTL	Ferritin, light chain	134790	Hyperferritinemia-cataract syndrome, 600886 (3), Autosomal dominant; Neurodegeneration with brain iron accumulation 3, 606159 (3), Autosomal dominant; L-ferritin deficiency, dominant and recessive, 615604 (3), Autosomal recessive, Autosomal dominant
FTO	FTO alpha-ketoglutarate dependent dioxygenase	610966	Growth retardation, developmental delay, facial dysmorphism, 612938 (3), Autosomal recessive; {Obesity, susceptibility to, BMIQ14}, 612460 (3), Autosomal recessive
FTSJ1	FTSJ RNA 2-prime-O-methyltransferase 1	300499	Mental retardation, X-linked 9/44, 309549 (3), X-linked recessive
FUCA1	Fucosidase, alpha-L- 1, tissue	612280	Fucosidosis, 230000 (3), Autosomal recessive
FUS	Fusion, derived from 12-16 translocation, malignant liposarcoma	137070	Amyotrophic lateral sclerosis 6, with or without frontotemporal dementia, 608030 (3); Essential tremor, hereditary, 4, 614782 (3), Autosomal dominant
FUT1	Fucosyltransferase-1 (Bombay phenotype)	211100	[Bombay phenotype], 616754 (3), Autosomal recessive
FUT2	Fucosyltransferase-2 (secretor)	182100	{Vitamin B12 plasma level QTL1}, 612542 (3); [Bombay phenotype, digenic], 616754 (3), Autosomal recessive; {Norwalk virus infection, resistance to} (3)
FUT3	Fucosyltransferase 3	111100	[Blood group, Lewis] (3)
FUT6	Fucosyltransferase 6 (alpha (1,3) fucosyltransferase)	136836	Fucosyltransferase 6 deficiency, 613852 (3)
FUT8	Fucosyltransferase 8	602589	Congenital disorder of glycosylation with defective fucosylation 1, 618005 (3), Autosomal recessive
FUZ	Fuzzy planar cell polarity protein	610622	{Neural tube defects, susceptibility to}, 182940 (3), Autosomal dominant
FXN	Frataxin	606829	Friedreich ataxia with retained reflexes, 229300 (3), Autosomal recessive; Friedreich ataxia, 229300 (3), Autosomal recessive
FXYD2	FXYD domain-containing ion transport regulator 2 (sodium-potassium-ATPase, gamma polypeptide)	601814	Hypomagnesemia 2, renal, 154020 (3), Autosomal dominant
FYB1	FYN-binding protein 1	602731	Thrombocytopenia 3, 273900 (3), Autosomal recessive
FYCO1	FYVE and coiled-coil domain containing 1	607182	Cataract 18, autosomal recessive, 610019 (3), Autosomal recessive
FZD2	Frizzled class receptor 2	600667	Omodysplasia 2, 164745 (3), Autosomal dominant
FZD4	Frizzled, Drosophila, homolog of, 4	604579	Exudative vitreoretinopathy 1, 133780 (3), Autosomal dominant; Retinopathy of prematurity, 133780 (3), Autosomal dominant
FZD6	Frizzled class receptor 6	603409	Nail disorder, nonsyndromic congenital, 10, (claw-shaped nails), 614157 (3), Autosomal recessive
G6PC	Glucose-6-phosphatase, catalytic	613742	Glycogen storage disease Ia, 232200 (3), Autosomal recessive
G6PC3	Glucose-6-phosphatase, catalytic, 3	611045	Dursun syndrome, 612541 (3), Autosomal recessive; Neutropenia, severe congenital 4, autosomal recessive, 612541 (3), Autosomal recessive
G6PD	Glucose-6-phosphate dehydrogenase	305900	Hemolytic anemia, G6PD deficient (favism), 300908 (3), X-linked dominant; {Resistance to malaria due to G6PD deficiency}, 611162 (3)
GAA	Glucosidase, acid alpha-	606800	Glycogen storage disease II, 232300 (3), Autosomal recessive
GAB1	Grb2-associated binding protein 1	604439	?Deafness, autosomal recessive 26, 605428 (3), Autosomal recessive
GABBR2	Gamma-aminobutyric acid B receptor 2	607340	Neurodevelopmental disorder with poor language and loss of hand skills, 617903 (3), Autosomal dominant; Epileptic encephalopathy, early infantile, 59, 617904 (3), Autosomal dominant; {Nicotine dependence, susceptibility to}, 188890 (3); {Nicotine dependence, protection against}, 188890 (3)
GABRA1	Gamma-aminobutyric acid (GABA) A receptor, alpha-1	137160	{Epilepsy, childhood absence, susceptibility to, 4}, 611136 (3); {Epilepsy, juvenile myoclonic, susceptibility to, 5}, 611136 (3); Epileptic encephalopathy, early infantile, 19, 615744 (3), Autosomal dominant
GABRA2	Gamma-aminobutyric acid (GABA) A receptor, alpha-2	137140	{Alcohol dependence, susceptibility to}, 103780 (3), Multifactorial; Epileptic encephalopathy, early infantile, 78, 618557 (3), Autosomal dominant
GABRA5	Gamma-aminobutyric acid (GABA) A receptor, alpha-5	137142	Epileptic encephalopathy, early infantile, 79, 618559 (3), Autosomal dominant
GABRB1	Gamma-aminobutyric acid (GABA) A receptor, beta-1	137190	Epileptic encephalopathy, early infantile, 45, 617153 (3), Autosomal dominant
GABRB2	Gamma-aminobutyric acid (GABA) A receptor, beta-2	600232	Epileptic encephalopathy, infantile or early childhood, 2, 617829 (3), Autosomal dominant
GABRB3	Gamma-aminobutyric acid (GABA) A receptor, beta-3	137192	{Epilepsy, childhood absence, susceptibility to, 5}, 612269 (3); Epileptic encephalopathy, early infantile, 43, 617113 (3), Autosomal dominant
GABRD	Gamma-aminobutyric acid (GABA) A receptor, delta	137163	{Epilepsy, juvenile myoclonic, susceptibility to}, 613060 (3), Autosomal dominant; {Epilepsy, idiopathic generalized, 10}, 613060 (3), Autosomal dominant; {Epilepsy, generalized, with febrile seizures plus, type 5, susceptibility to}, 613060 (3), Autosomal dominant
GABRG2	Gamma-aminobutyric acid (GABA) A receptor, gamma-2	137164	Epileptic encephalopathy, early infantile, 74, 618396 (3), Autosomal dominant; Febrile seizures, familial, 8, 607681 (3), Autosomal dominant; Epilepsy, generalized, with febrile seizures plus, type 3, 607681 (3), Autosomal dominant
GAD1	Glutamate decarboxylase-1, brain, 67kD	605363	?Cerebral palsy, spastic quadriplegic, 1, 603513 (3), Autosomal recessive
GAL	Galanin	137035	?Epilepsy, familial temporal lobe, 8, 616461 (3), Autosomal dominant
GALC	Galactosylceramidase	606890	Krabbe disease, 245200 (3), Autosomal recessive
GALE	UDP galactose-4-epimerase	606953	Galactose epimerase deficiency, 230350 (3), Autosomal recessive
GALK1	Galactokinase-1	604313	Galactokinase deficiency with cataracts, 230200 (3), Autosomal recessive
GALNS	Galactosamine (N-acetyl)-6-sulfate sulfatase	612222	Mucopolysaccharidosis IVA, 253000 (3), Autosomal recessive
GALNT12	UDP-N-acetyl-alpha-D-galactosamine:polypeptide N-acetylgalactosaminyltransferase 12	610290	{Colorectal cancer, susceptibility to, 1}, 608812 (3)
GALNT3	UDP-N-acetyl-alpha-D-galactosamine:polypeptide N-acetylgalactosaminyltransferase 3	601756	Tumoral calcinosis, hyperphosphatemic, familial, 1, 211900 (3), Autosomal recessive
GALT	Galactose-1-phosphate uridyltransferase	606999	Galactosemia, 230400 (3), Autosomal recessive
GAMT	Guanidinoacetate methyltransferase	601240	Cerebral creatine deficiency syndrome 2, 612736 (3), Autosomal recessive
GAN	Gigaxonin	605379	Giant axonal neuropathy-1, 256850 (3), Autosomal recessive
GANAB	Neutral alpha-glucosidase AB	104160	Polycystic kidney disease 3, 600666 (3), Autosomal dominant
GARS1	Glycyl-tRNA synthetase 1	600287	Charcot-Marie-Tooth disease, type 2D, 601472 (3), Autosomal dominant; Neuropathy, distal hereditary motor, type VA, 600794 (3), Autosomal dominant
GAS2L2	Growth arrest-specific 2-like 2	611398	?Ciliary dyskinesia, primary, 41, 618449 (3), Autosomal recessive
GAS8	Growth arrest-specific 8	605178	Ciliary dyskinesia, primary, 33, 616726 (3), Autosomal recessive
GATA1	GATA-binding protein-1 (globin transcription factor-1)	305371	Leukemia, megakaryoblastic, with or without Down syndrome, somatic, 190685 (3); Anemia, X-linked, with/without neutropenia and/or platelet abnormalities, 300835 (3), X-linked recessive; Thrombocytopenia, X-linked, with or without dyserythropoietic anemia, 300367 (3), X-linked recessive; Thrombocytopenia with beta-thalassemia, X-linked, 314050 (3), X-linked recessive
GATA2	GATA-binding protein-2	137295	Emberger syndrome, 614038 (3), Autosomal dominant; {Myelodysplastic syndrome, susceptibility to}, 614286 (3); Immunodeficiency 21, 614172 (3), Autosomal dominant; {Leukemia, acute myeloid, susceptibility to}, 601626 (3), Autosomal dominant, Somatic mutation
GATA3	GATA-binding protein-3	131320	Hypoparathyroidism, sensorineural deafness, and renal dysplasia, 146255 (3), Autosomal dominant
GATA4	GATA-binding protein-4	600576	?Testicular anomalies with or without congenital heart disease, 615542 (3), Autosomal dominant; Tetralogy of Fallot, 187500 (3), Autosomal dominant; Atrioventricular septal defect 4, 614430 (3), Autosomal dominant; Atrial septal defect 2, 607941 (3), Autosomal dominant; Ventricular septal defect 1, 614429 (3), Autosomal dominant
GATA5	GATA-binding protein 5	611496	Congenital heart defects, multiple types, 5, 617912 (3), Autosomal recessive, Autosomal dominant
GATA6	GATA-binding protein-6	601656	Pancreatic agenesis and congenital heart defects, 600001 (3), Autosomal dominant; Atrial septal defect 9, 614475 (3), Autosomal dominant; Atrioventricular septal defect 5, 614474 (3), Autosomal dominant; Persistent truncus arteriosus, 217095 (3); Tetralogy of Fallot, 187500 (3), Autosomal dominant
GATAD1	GATA zinc finger domain-containing protein 1	614518	?Cardiomyopathy, dilated, 2B, 614672 (3), Autosomal recessive
GATAD2B	GATA zinc finger domain-containing protein 2B	614998	Mental retardation, autosomal dominant 18, 615074 (3), Autosomal dominant
GATM	L-arginine:glycine amidinotransferase	602360	Cerebral creatine deficiency syndrome 3, 612718 (3), Autosomal recessive
GBA	Glucosidase, acid beta	606463	Gaucher disease, type III, 231000 (3), Autosomal recessive; {Parkinson disease, late-onset, susceptibility to}, 168600 (3), Autosomal dominant, Multifactorial; Gaucher disease, type IIIC, 231005 (3), Autosomal recessive; Gaucher disease, type I, 230800 (3), Autosomal recessive; Gaucher disease, perinatal lethal, 608013 (3), Autosomal recessive; Gaucher disease, type II, 230900 (3), Autosomal rece…
GBA2	Glucosidase, beta, acid 2	609471	Spastic paraplegia 46, autosomal recessive, 614409 (3), Autosomal recessive
GBE1	Glycogen branching enzyme	607839	Polyglucosan body disease, adult form, 263570 (3), Autosomal recessive; Glycogen storage disease IV, 232500 (3), Autosomal recessive
GCDH	Glutaryl-Coenzyme A dehydrogenase	608801	Glutaricaciduria, type I, 231670 (3), Autosomal recessive
GCG	Glucagon	138030	[?Hyperproglucagonemia] (1)
GCGR	Glucagon receptor	138033	{Diabetes mellitus, noninsulin-dependent}, 125853 (3), Autosomal dominant
GCH1	GTP cyclohydrolase 1	600225	Hyperphenylalaninemia, BH4-deficient, B, 233910 (3), Autosomal recessive; Dystonia, DOPA-responsive, with or without hyperphenylalaninemia, 128230 (3), Autosomal recessive, Autosomal dominant
GCK	Glucokinase (hexokinase-4)	138079	Diabetes mellitus, noninsulin-dependent, late onset, 125853 (3), Autosomal dominant; Diabetes mellitus, permanent neonatal, 606176 (3), Autosomal recessive, Autosomal dominant; MODY, type II, 125851 (3), Autosomal dominant; Hyperinsulinemic hypoglycemia, familial, 3, 602485 (3), Autosomal dominant
GCKR	Glucokinase (hexokinase 4) regulatory protein	600842	[Fasting plasma glucose level QTL 5], 613463 (3)
GCLC	Glutamate-cysteine ligase, catalytic subunit	606857	Hemolytic anemia due to gamma-glutamylcysteine synthetase deficiency, 230450 (3), Autosomal recessive; {Myocardial infarction, susceptibility to}, 608446 (3)
GCLM	Glutamate-cysteine ligase, modifier subunit	601176	{Myocardial infarction, susceptibility to}, 608446 (3)
GCM2	Glial cells missing transcription factor 2	603716	Hyperparathyroidism 4, 617343 (3), Autosomal dominant; Hypoparathyroidism, familial isolated, 146200 (3), Autosomal recessive, Autosomal dominant
GCNT2	Glucosaminyl (N-acetyl) transferase 2, I-branching enzyme	600429	Adult i phenotype without cataract, 110800 (3), Autosomal dominant; Cataract 13 with adult i phenotype, 116700 (3), Autosomal recessive; [Blood group, Ii], 110800 (3), Autosomal dominant
GCSH	Glycine cleavage system H protein	238330	?Glycine encephalopathy, 605899 (3), Autosomal recessive
GDAP1	Ganglioside-induced differentiation-associated protein 1	606598	Charcot-Marie-Tooth disease, recessive intermediate, A, 608340 (3), Autosomal recessive; Charcot-Marie-Tooth disease, type 4A, 214400 (3), Autosomal recessive; Charcot-Marie-Tooth disease, axonal, type 2K, 607831 (3), Autosomal recessive, Autosomal dominant; Charcot-Marie-Tooth disease, axonal, with vocal cord paresis, 607706 (3), Autosomal recessive
GDAP2	Ganglioside-induced differentiation-associated protein 2	618128	Spinocerebellar ataxia, autosomal recessive 27, 618369 (3), Autosomal recessive
GDF1	Growth/differentiation factor 1	602880	Right atrial isomerism (Ivemark), 208530 (3), Autosomal recessive; Congenital heart defects, multiple types, 6, 613854 (3), Autosomal dominant
GDF2	Growth differentiation factor 2 (bone morphogenetic protein 9)	605120	Telangiectasia, hereditary hemorrhagic, type 5, 615506 (3), Autosomal dominant
GDF3	Growth differentiation factor 3	606522	Microphthalmia, isolated 7, 613704 (3), Autosomal dominant; Microphthalmia with coloboma 6, 613703 (3), Autosomal dominant; Klippel-Feil syndrome 3, autosomal dominant, 613702 (3)
GDF5	Growth/differentiation factor-5 (cartilage-derived morphogenetic protein-1)	601146	?Acromesomelic dysplasia, Hunter-Thompson type, 201250 (3), Autosomal recessive; Symphalangism, proximal, 1B, 615298 (3); Brachydactyly, type A1, C, 615072 (3), Autosomal recessive, Autosomal dominant; Chondrodysplasia, Grebe type, 200700 (3), Autosomal recessive; Brachydactyly, type A2, 112600 (3), Autosomal dominant; Du Pan syndrome, 228900 (3), Autosomal recessive; {Osteoarthritis-5}, 612400 (…
GDF6	Growth/differentiation factor 6	601147	Leber congenital amaurosis 17, 615360 (3), Autosomal recessive; Klippel-Feil syndrome 1, autosomal dominant, 118100 (3), Autosomal dominant; Multiple synostoses syndrome 4, 617898 (3), Autosomal dominant; Microphthalmia with coloboma 6, digenic, 613703 (3), Autosomal dominant; Microphthalmia, isolated 4, 613094 (3)
GDF9	Growth/differentiation factor 9	601918	?Premature ovarian failure 14, 618014 (3), Autosomal recessive
GDI1	GDP dissociation inhibitor 1	300104	Mental retardation, X-linked 41, 300849 (3), X-linked dominant
GDNF	Glial cell line derived neurotrophic factor	600837	{Pheochromocytoma, modifier of}, 171300 (3), Autosomal dominant; {Hirschsprung disease, susceptibility to, 3}, 613711 (3), Autosomal dominant; Central hypoventilation syndrome, 209880 (3), Autosomal dominant
GEMIN4	Neurodevelopmental disorder with microcephaly, cataracts, and renal abnormalities	606969	Neurodevelopmental disorder with microcephaly, cataracts, and renal abnormalities, 617913 (3), Autosomal recessive
GFAP	Glial fibrillary acidic protein	137780	Alexander disease, 203450 (3), Autosomal dominant
GFER	Growth factor, erv1, S. cerevisiae, homolog of (augmenter of liver regeneration)	600924	Myopathy, mitochondrial progressive, with congenital cataract, hearing loss, and developmental delay, 613076 (3)
GFI1	Growth factor independent 1	600871	?Neutropenia, severe congenital 2, autosomal dominant, 613107 (3), Autosomal dominant; ?Neutropenia, nonimmune chronic idiopathic, of adults, 607847 (3), Autosomal dominant
GFI1B	Growth factor-independent 1B	604383	Bleeding disorder, platelet-type, 17, 187900 (3), Autosomal recessive, Autosomal dominant
GFM1	Mitochondrial elongation factor G1	606639	Combined oxidative phosphorylation deficiency 1, 609060 (3), Autosomal recessive
GFM2	Mitochondrial elongation factor G2	606544	Combined oxidative phosphorylation deficiency 39, 618397 (3), Autosomal recessive
GFPT1	Glutamine-fructose-6-phosphate transaminase	138292	Myasthenia, congenital, 12, with tubular aggregates, 610542 (3), Autosomal recessive
GGCX	Gamma-glutamyl carboxylase	137167	Vitamin K-dependent clotting factors, combined deficiency of, 1, 277450 (3), Autosomal recessive; Pseudoxanthoma elasticum-like disorder with multiple coagulation factor deficiency, 610842 (3)
GGT1	Gamma-glutamyltransferase 1	612346	?Glutathioninuria, 231950 (3), Autosomal recessive
GGT2	Gamma-glutamyltransferase-2	137181	[Gamma-glutamyltransferase, familial high serum], 137181 (2)
GH1	Growth hormone-1	139250	Kowarski syndrome, 262650 (3), Autosomal recessive; Growth hormone deficiency, isolated, type IA, 262400 (3), Autosomal recessive; Growth hormone deficiency, isolated, type IB, 612781 (3); Growth hormone deficiency, isolated, type II, 173100 (3), Autosomal dominant
GHR	Growth hormone receptor	600946	{Hypercholesterolemia, familial, modifier of}, 143890 (3), Autosomal dominant; Increased responsiveness to growth hormone, 604271 (3), Autosomal dominant; Laron dwarfism, 262500 (3), Autosomal recessive; Growth hormone insensitivity, partial, 604271 (3), Autosomal dominant
GHRH	Growth hormone releasing hormone (somatocrinin)	139190	?Isolated growth hormone deficiency due to defect in GHRF (1); Gigantism due to GHRF hypersecretion (1)
GHRHR	Growth hormone releasing hormone receptor	139191	Growth hormone deficiency, isolated, type IV, 618157 (3)
GHRL	Ghrelin	605353	{Obesity, susceptibility to}, 601665 (3), Autosomal recessive, Autosomal dominant, Multifactorial
GHSR	Growth hormone secretagogue receptor	601898	Growth hormone deficiency, isolated partial, 615925 (3), Autosomal recessive, Autosomal dominant
GIGYF2	GRB10-interacting GYF protein 2	612003	{Parkinson disease 11}, 607688 (3)
GINS1	GINS complex subunit 1	610608	Immunodeficiency 55, 617827 (3), Autosomal recessive
GIPC3	GAIP C-terminus-interacting protein 3	608792	Deafness, autosomal recessive 15, 601869 (3), Autosomal recessive
GJA1	Gap junction protein, alpha-1, 43kD (connexin 43)	121014	Erythrokeratodermia variabilis et progressiva 3, 617525 (3), Autosomal dominant; Craniometaphyseal dysplasia, autosomal recessive, 218400 (3), Autosomal recessive; Atrioventricular septal defect 3, 600309 (3), Autosomal dominant; Oculodentodigital dysplasia, 164200 (3), Autosomal dominant; Syndactyly, type III, 186100 (3), Autosomal dominant; Oculodentodigital dysplasia, autosomal recessive, 2578…
GJA3	Gap junction protein, alpha-3, 46kD (connexin 46)	121015	Cataract 14, multiple types, 601885 (3), Autosomal dominant
GJA5	Gap junction protein, alpha-5, 40kD (connexin 40)	121013	Atrial fibrillation, familial, 11, 614049 (3), Autosomal dominant; Atrial standstill, digenic (GJA5/SCN5A), 108770 (3), Autosomal dominant
GJA8	Gap junction membrane channel protein alpha-8 (connexin 50)	600897	Cataract 1, multiple types, 116200 (3), Autosomal dominant
GJB1	Gap junction protein, beta-1, 32kD (connexin 32)	304040	Charcot-Marie-Tooth neuropathy, X-linked dominant, 1, 302800 (3), X-linked dominant
GJB2	Gap junction protein, beta-2, 26kD (connexin 26)	121011	Deafness, autosomal dominant 3A, 601544 (3), Autosomal dominant; Deafness, autosomal recessive 1A, 220290 (3), Autosomal recessive, Digenic dominant; Bart-Pumphrey syndrome, 149200 (3), Autosomal dominant; Vohwinkel syndrome, 124500 (3), Autosomal dominant; Keratoderma, palmoplantar, with deafness, 148350 (3), Autosomal dominant; Keratitis-ichthyosis-deafness syndrome, 148210 (3), Autosomal domin…
GJB3	Gap junction protein, beta-3	603324	Deafness, autosomal dominant 2B, 612644 (3), Autosomal dominant; Deafness, autosomal recessive (3); Deafness, autosomal dominant, with peripheral neuropathy (3); Deafness, digenic, GJB2/GJB3, 220290 (3), Autosomal recessive, Digenic dominant; Erythrokeratodermia variabilis et progressiva 1, 133200 (3), Autosomal recessive, Autosomal dominant
GJB4	Gap junction protein, beta-4	605425	Erythrokeratodermia variabilis et progressiva 2, 617524 (3), Autosomal dominant
GJB6	Gap junction protein, beta-6 (connexin-30)	604418	Deafness, autosomal dominant 3B, 612643 (3), Autosomal dominant; Deafness, autosomal recessive 1B, 612645 (3), Autosomal recessive; Deafness, digenic GJB2/GJB6, 220290 (3), Autosomal recessive, Digenic dominant; Ectodermal dysplasia 2, Clouston type, 129500 (3), Autosomal dominant
GJC2	Gap junction protein, gamma-2 (47kD)	608803	Spastic paraplegia 44, autosomal recessive, 613206 (3), Autosomal recessive; Lymphatic malformation 3, 613480 (3), Autosomal dominant; Leukodystrophy, hypomyelinating, 2, 608804 (3), Autosomal recessive
GK	Glycerol kinase	300474	Glycerol kinase deficiency, 307030 (3), X-linked recessive
GLA	Galactosidase, alpha	300644	Fabry disease, 301500 (3), X-linked; Fabry disease, cardiac variant, 301500 (3), X-linked
GLB1	Galactosidase, beta-1	611458	GM1-gangliosidosis, type III, 230650 (3), Autosomal recessive; GM1-gangliosidosis, type I, 230500 (3), Autosomal recessive; Mucopolysaccharidosis type IVB (Morquio), 253010 (3), Autosomal recessive; GM1-gangliosidosis, type II, 230600 (3), Autosomal recessive
GLCCI1	Glucocorticoid-induced transcript 1	614283	{Glucocorticoid therapy, response to}, 614400 (3)
GLDC	Glycine dehydrogenase (decarboxylating; glycine decarboxylase, glycine cleavage system protein P)	238300	Glycine encephalopathy, 605899 (3), Autosomal recessive
GLDN	Gliomedin	608603	Lethal congenital contracture syndrome 11, 617194 (3), Autosomal recessive
GLE1	Gle1, RNA export mediator, S. cerevisiae, homolog of	603371	Congenital arthrogryposis with anterior horn cell disease, 611890 (3), Autosomal recessive; Lethal congenital contracture syndrome 1, 253310 (3), Autosomal recessive
GLI1	GLI family zinc finger 1	165220	Polydactyly, postaxial, type A8, 618123 (3), Autosomal recessive; Polydactyly, preaxial I, 174400 (3), Autosomal recessive
GLI2	GLI-Kruppel family member GLI2 (oncogene GLI2)	165230	Culler-Jones syndrome, 615849 (3), Autosomal dominant; Holoprosencephaly 9, 610829 (3), Autosomal dominant
GLI3	GLI-Kruppel family member GLI3 (oncogene GLI3)	165240	Polydactyly, postaxial, types A1 and B, 174200 (3), Autosomal dominant; {Hypothalamic hamartomas, somatic}, 241800 (3); Greig cephalopolysyndactyly syndrome, 175700 (3), Autosomal dominant; Polydactyly, preaxial, type IV, 174700 (3), Autosomal dominant; Pallister-Hall syndrome, 146510 (3), Autosomal dominant
GLIS2	GLIS family zinc finger protein 2	608539	Nephronophthisis 7, 611498 (3)
GLIS3	GLIS family zinc finger protein 3	610192	Diabetes mellitus, neonatal, with congenital hypothyroidism, 610199 (3), Autosomal recessive
GLMN	Glomulin	601749	Glomuvenous malformations, 138000 (3), Autosomal dominant
GLRA1	Glycine receptor, alpha-1 polypeptide	138491	Hyperekplexia 1, 149400 (3), Autosomal recessive, Autosomal dominant
GLRB	Glycine receptor, beta subunit	138492	Hyperekplexia 2, 614619 (3), Autosomal recessive
GLRX5	Glutaredoxin 5	609588	Anemia, sideroblastic, 3, pyridoxine-refractory, 616860 (3), Autosomal recessive; Spasticity, childhood-onset, with hyperglycinemia, 616859 (3), Autosomal recessive
GLS	Glutaminase	138280	?Infantile cataract, skin abnormalities, glutamate excess, and impaired intellectual development, 618339 (3), Autosomal dominant; Global developmental delay, progressive ataxia, and elevated glutamine, 618412 (3), Autosomal recessive; Epileptic encephalopathy, early infantile, 71, 618328 (3), Autosomal recessive
GLUD1	Glutamate dehydrogenase-1	138130	Hyperinsulinism-hyperammonemia syndrome, 606762 (3), Autosomal dominant
GLUD2	Glutamate dehydrogenase-2	300144	{Parkinson disease, age of onset, modifier}, 168600 (3), Autosomal dominant, Multifactorial
GLUL	Glutamate-ammonia ligase (glutamine synthase)	138290	Glutamine deficiency, congenital, 610015 (3), Autosomal recessive
GLYCTK	Glycerate kinase	610516	D-glyceric aciduria, 220120 (3), Autosomal recessive
GM2A	GM2 ganglioside activator protein	613109	GM2-gangliosidosis, AB variant, 272750 (3), Autosomal recessive
GMNN	Geminin	602842	Meier-Gorlin syndrome 6, 616835 (3), Autosomal dominant
GMPPA	GDP-mannose pyrophosphorylase A	615495	Alacrima, achalasia, and mental retardation syndrome, 615510 (3), Autosomal recessive
GMPPB	GDP-mannose pyrophosphorylase B	615320	Muscular dystrophy-dystroglycanopathy (congenital with brain and eye anomalies), type A, 14, 615350 (3), Autosomal recessive; Muscular dystrophy-dystroglycanopathy (congenital with mental retardation), type B, 14, 615351 (3), Autosomal recessive; Muscular dystrophy-dystroglycanopathy (limb-girdle), type C, 14, 615352 (3), Autosomal recessive
GNA11	Guanine nucleotide-binding protein, Gq class, GNA11	139313	Hypocalciuric hypercalcemia, type II, 145981 (3), Autosomal dominant; Hypocalcemia, autosomal dominant 2, 615361 (3), Autosomal dominant
GNAI2	Guanine nucleotide-binding protein (G protein), alpha-inhibiting activity polypeptide-2	139360	Pituitary ACTH-secreting adenoma (3); Ventricular tachycardia, idiopathic, 192605 (3), Autosomal dominant
GNAI3	Guanine nucleotide-binding protein (G-protein), alpha-inhibiting activity polypeptide-3	139370	Auriculocondylar syndrome 1, 602483 (3), Autosomal dominant
GNAL	Guanine nucleotide-binding protein, alpha-subunit, olfactory type	139312	Dystonia 25, 615073 (3), Autosomal dominant
GNAO1	Guanine nucleotide-binding protein (G protein), alpha-activating activity	139311	Epileptic encephalopathy, early infantile, 17, 615473 (3), Autosomal dominant; Neurodevelopmental disorder with involuntary movements, 617493 (3), Autosomal dominant
GNAQ	Guanine nucleotide-binding protein (G protein), q	600998	Sturge-Weber syndrome, somatic, mosaic, 185300 (3); Capillary malformations, congenital, 1, somatic, mosaic, 163000 (3)
GNAS	GNAS complex locus (guanine nucleotide binding protein (G protein), alpha stimulating activity polypeptide 1)	139320	ACTH-independent macronodular adrenal hyperplasia, 219080 (3), Somatic mutation; Pseudohypoparathyroidism Ic, 612462 (3), Autosomal dominant; Pseudohypoparathyroidism Ib, 603233 (3), Autosomal dominant; Pseudopseudohypoparathyroidism, 612463 (3), Autosomal dominant; McCune-Albright syndrome, somatic, mosaic, 174800 (3); Osseous heteroplasia, progressive, 166350 (3), Autosomal dominant; Pituitary …
GNAS-AS1	GNAS antisense RNA 1	610540	Pseudohypoparathyroidism, type IB, 603233 (3), Autosomal dominant
GNAT1	Guanine nucleotide-binding protein (G protein), alpha-transducing (transducin) activity polypeptide-1	139330	Night blindness, congenital stationary, type 1G, 616389 (3), Autosomal recessive; Night blindness, congenital stationary, autosomal dominant 3, 610444 (3), Autosomal dominant
GNAT2	Guanine nucleotide-binding protein (G-protein), alpha-transducing (transducin) activity polypeptide-2	139340	Achromatopsia 4, 613856 (3)
GNB1	Guanine nucleotide-binding protein, beta polypeptide-1	139380	Mental retardation, autosomal dominant 42, 616973 (3), Autosomal dominant; Leukemia, acute lymphoblastic, somatic, 613065 (3)
GNB3	Guanine nucleotide-binding protein, beta polypeptide-3	139130	{Hypertension, essential, susceptibility to}, 145500 (3), Multifactorial; Night blindness, congenital stationary, type 1H, 617024 (3), Autosomal recessive
GNB4	Guanine nucleotide-binding protein, beta-4	610863	Charcot-Marie-Tooth disease, dominant intermediate F, 615185 (3), Autosomal dominant
GNB5	Guanine nucleotide-binding protein, beta-5	604447	Intellectual developmental disorder with cardiac arrhythmia, 617173 (3), Autosomal recessive; Language delay and ADHD/cognitive impairment with or without cardiac arrhythmia, 617182 (3), Autosomal recessive
GNE	UDP-N-acetylglucosamine 2-epimerase/N-acetylmannosamine kinase	603824	Sialuria, 269921 (3), Autosomal dominant; Nonaka myopathy, 605820 (3), Autosomal recessive
GNMT	Glycine N-methyltransferase	606628	Glycine N-methyltransferase deficiency, 606664 (3), Autosomal recessive
GNPAT	Glyceronephosphate O-acyltransferase	602744	Rhizomelic chondrodysplasia punctata, type 2, 222765 (3), Autosomal recessive
GNPTAB	N-acetylglucosamine-1-phosphate transferase, alpha/beta subunits	607840	Mucolipidosis II alpha/beta, 252500 (3), Autosomal recessive; Mucolipidosis III alpha/beta, 252600 (3), Autosomal recessive
GNPTG	N-acetylglucosamine-1-phosphotransferase, gamma subunit	607838	Mucolipidosis III gamma, 252605 (3), Autosomal recessive
GNRH1	Gonadotropin-releasing hormone-1 (luteinizing-releasing hormone)	152760	?Hypogonadotropic hypogonadism 12 with or without anosmia, 614841 (3), Autosomal recessive
GNRHR	Gonadotropin-releasing hormone receptor	138850	Hypogonadotropic hypogonadism 7 without anosmia, 146110 (3), Autosomal recessive
GNS	N-acetylglucosamine-6-sulfatase	607664	Mucopolysaccharidosis type IIID, 252940 (3), Autosomal recessive
GORAB	Golgin, RAB6-interacting	607983	Geroderma osteodysplasticum, 231070 (3), Autosomal recessive
GOSR2	Golgi snap receptor complex member 2	604027	Epilepsy, progressive myoclonic 6, 614018 (3), Autosomal recessive
GOT1	Glutamic-oxaloacetic transaminase-1, soluble (EC 2.6.1.1)	138180	Aspartate aminotransferase, serum level of, QTL1, 614419 (3)
GP1BA	Glycoprotein Ib, platelet, alpha polypeptide	606672	Bernard-Soulier syndrome, type A1 (recessive), 231200 (3), Autosomal recessive; {Nonarteritic anterior ischemic optic neuropathy, susceptibility to}, 258660 (3), Autosomal recessive; von Willebrand disease, platelet-type, 177820 (3), Autosomal dominant; Bernard-Soulier syndrome, type A2 (dominant), 153670 (3), Autosomal dominant
GP1BB	Glycoprotein Ib, platelet, beta polypeptide	138720	Giant platelet disorder, isolated, 231200 (3), Autosomal recessive; Bernard-Soulier syndrome, type B, 231200 (3), Autosomal recessive
GP6	Glycoprotein VI, platelet	605546	Bleeding disorder, platelet-type, 11, 614201 (3), Autosomal recessive
GP9	Glycoprotein IX, platelet	173515	Bernard-Soulier syndrome, type C, 231200 (3), Autosomal recessive
GPAA1	Glycophosphatidylinositol anchor attachment protein 1	603048	Glycosylphosphatidylinositol biosynthesis defect 15, 617810 (3), Autosomal recessive
GPC3	Glypican 3	300037	Simpson-Golabi-Behmel syndrome, type 1, 312870 (3), X-linked recessive; Wilms tumor, somatic, 194070 (3)
GPC4	Glypican 4	300168	Keipert syndrome, 301026 (3), X-linked recessive
GPC6	Glypican 6	604404	Omodysplasia 1, 258315 (3), Autosomal recessive
GPD1	Glycerol-3-phosphate dehydrogenase, soluble	138420	Hypertriglyceridemia, transient infantile, 614480 (3), Autosomal recessive
GPD1L	Glycerol-3-phosphate dehydrogenase 1-like	611778	Brugada syndrome 2, 611777 (3)
GPD2	Glycerol-3-phosphate dehydrogenase 2 (mitochondrial)	138430	{Diabetes, type 2, susceptibility to}, 125853 (3), Autosomal dominant
GPHN	Gephyrin	603930	Molybdenum cofactor deficiency C, 615501 (3), Autosomal recessive
GPI	Glucose phosphate isomerase; neuroleukin	172400	Hemolytic anemia, nonspherocytic, due to glucose phosphate isomerase deficiency, 613470 (3), Autosomal recessive
GPIHBP1	Glycosylphosphatidylinositol-anchored high density lipoprotein-binding protein 1	612757	Hyperlipoproteinemia, type 1D, 615947 (3), Autosomal recessive
GPNMB	Glycoprotein NMB	604368	Amyloidosis, primary localized cutaneous, 3, 617920 (3), Autosomal recessive
GPR101	G protein-coupled receptor 101	300393	Pituitary adenoma 2, GH-secreting, 300943 (3), X-linked
GPR143	G protein-coupled receptor 143	300808	Ocular albinism, type I, Nettleship-Falls type, 300500 (3), X-linked; Nystagmus 6, congenital, X-linked, 300814 (3)
GPR179	G protein-coupled receptor 179	614515	Night blindness, congenital stationary (complete), 1E, autosomal recessive, 614565 (3), Autosomal recessive
GPR68	G protein-coupled receptor 68	601404	Amelogenesis imperfecta, hypomaturation type, IIA6, 617217 (3), Autosomal recessive
GPR88	G protein-coupled receptor 88	607468	?Chorea, childhood-onset, with psychomotor retardation, 616939 (3), Autosomal recessive
GPRASP2	G protein-coupled receptor-associated sorting protein 2	300969	?Deafness, X-linked 7, 301018 (3), X-linked recessive
GPSM2	G protein signaling modulator 2	609245	Chudley-McCullough syndrome, 604213 (3), Autosomal recessive
GPT2	Glutamate pyruvate transaminase 2	138210	Mental retardation, autosomal recessive 49, 616281 (3), Autosomal recessive
GPX1	Glutathione peroxidase-1	138320	Hemolytic anemia due to glutathione peroxidase deficiency, 614164 (1), Autosomal recessive
GPX4	Glutathione peroxidase-4 (phospholipid hydroperoxidase)	138322	Spondylometaphyseal dysplasia, Sedaghatian type, 250220 (3), Autosomal recessive
GRAP	GRB2-related adaptor protein	604330	Deafness, autosomal recessive 114, 618456 (3), Autosomal recessive
GREB1L	GREB1-like protein	617782	Renal hypodysplasia/aplasia 3, 617805 (3), Autosomal dominant
GREM2	Gremlin 2 homolog, cystine knot superfamily	608832	Tooth agenesis, selective, 9, 617275 (3), Autosomal dominant
GRHL2	Grainyhead-like 2	608576	Deafness, autosomal dominant 28, 608641 (3), Autosomal dominant; Corneal dystrophy, posterior polymorphous, 4, 618031 (3), Autosomal dominant; Ectodermal dysplasia/short stature syndrome, 616029 (3), Autosomal recessive
GRHL3	Grainyhead-like 3	608317	Van der Woude syndrome 2, 606713 (3), Autosomal dominant
GRHPR	Glyoxylate reductase/hydroxypyruvate reductase	604296	Hyperoxaluria, primary, type II, 260000 (3), Autosomal recessive
GRIA3	Glutamate receptor, ionotropic, AMPA 3	305915	Mental retardation, X-linked 94, 300699 (3), X-linked recessive
GRIA4	Glutamate receptor, ionotropic, AMPA 4	138246	Neurodevelopmental disorder with or without seizures and gait abnormalities, 617864 (3), Autosomal dominant
GRID2	Glutamate receptor, ionotropic, delta-2	602368	Spinocerebellar ataxia, autosomal recessive 18, 616204 (3), Autosomal recessive
GRIK2	Glutamate receptor, ionotropic, kainate 2	138244	Mental retardation, autosomal recessive, 6, 611092 (3), Autosomal recessive
GRIN1	Glutamate receptor, ionotropic, N-methyl D-aspartate 1	138249	Neurodevelopmental disorder with or without hyperkinetic movements and seizures, autosomal recessive, 617820 (3), Autosomal recessive; Neurodevelopmental disorder with or without hyperkinetic movements and seizures, autosomal dominant, 614254 (3), Autosomal dominant
GRIN2A	Glutamate receptor, ionotropic, N-methyl D-aspartate 2A	138253	Epilepsy, focal, with speech disorder and with or without mental retardation, 245570 (3), Autosomal dominant
GRIN2B	Glutamate receptor, ionotropic, N-methyl D-aspartate 2B	138252	Epileptic encephalopathy, early infantile, 27, 616139 (3), Autosomal dominant; Mental retardation, autosomal dominant 6, 613970 (3), Autosomal dominant
GRIN2D	Glutamate receptor, ionotropic, N-methyl-D-aspartate 2D	602717	Epileptic encephalopathy, early infantile, 46, 617162 (3), Autosomal dominant
GRIP1	Glutamate receptor-interacting protein 1	604597	Fraser syndrome 3, 617667 (3), Autosomal recessive
GRK1	G protein-dependent receptor kinase 1 (rhodopsin kinase)	180381	Oguchi disease-2, 613411 (3)
GRM1	Glutamate receptor, metabotropic, 1	604473	Spinocerebellar ataxia 44, 617691 (3), Autosomal dominant; Spinocerebellar ataxia, autosomal recessive 13, 614831 (3), Autosomal recessive
GRM6	Glutamate receptor, metabotropic, 6	604096	Night blindness, congenital stationary (complete), 1B, autosomal recessive, 257270 (3), Autosomal recessive
GRN	Granulin	138945	Ceroid lipofuscinosis, neuronal, 11, 614706 (3), Autosomal recessive; Aphasia, primary progressive, 607485 (3), Autosomal dominant; Frontotemporal lobar degeneration with ubiquitin-positive inclusions, 607485 (3), Autosomal dominant
GRXCR1	Glutaredoxin, cysteine-rich, 1	613283	Deafness, autosomal recessive 25, 613285 (3), Autosomal recessive
GRXCR2	Glutaredoxin, cysteine-rich, 2	615762	?Deafness, autosomal recessive 101, 615837 (3), Autosomal recessive
GSC	Goosecoid	138890	Short stature, auditory canal atresia, mandibular hypoplasia, skeletal abnormalities, 602471 (3), Autosomal recessive
GSDME	Gasdermin E	608798	Deafness, autosomal dominant 5, 600994 (3), Autosomal dominant
GSN	Gelsolin	137350	Amyloidosis, Finnish type, 105120 (3), Autosomal dominant
GSR	Glutathione reductase	138300	Hemolytic anemia due to glutathione reductase deficiency, 618660 (3), Autosomal recessive
GSS	Glutathione synthetase	601002	Glutathione synthetase deficiency, 266130 (3), Autosomal recessive; Hemolytic anemia due to glutathione synthetase deficiency, 231900 (3), Autosomal recessive
GSTZ1	Glutathione S-transferase, zeta-1 (maleylacetoacetate isomerase)	603758	[Maleylacetoacetate isomerase deficiency], 617596 (3), Autosomal recessive
GSX2	GS homeobox 2	616253	Diencephalic-mesencephalic junction dysplasia syndrome 2, 618646 (3), Autosomal recessive
GTF2E2	General transcription factor IIE, polypeptide 2, beta subunit, 34kD	189964	Trichothiodystrophy 6, nonphotosensitive, 616943 (3), Autosomal recessive
GTF2H5	General transcription factor IIH, polypeptide 5	608780	Trichothiodystrophy 3, photosensitive, 616395 (3)
GTPBP2	GTP-binding protein 2	607434	Jaberi-Elahi syndrome, 617988 (3), Autosomal recessive
GTPBP3	GTP-binding protein 3	608536	Combined oxidative phosphorylation deficiency 23, 616198 (3), Autosomal recessive
GUCA1A	Guanylate cyclase activator 1A, retina	600364	Cone-rod dystrophy 14, 602093 (3), Autosomal dominant; Cone dystrophy-3, 602093 (3), Autosomal dominant
GUCA1B	Guanylate cyclase activator 1B, retina	602275	Retinitis pigmentosa 48, 613827 (3)
GUCY1A1	Guanylate cyclase 1, soluble, alpha 3	139396	Moyamoya 6 with achalasia, 615750 (3), Autosomal recessive
GUCY2C	Guanylate cyclase 2C (heat stable enterotoxin receptor)	601330	Diarrhea 6, 614616 (3), Autosomal dominant; Meconium ileus, 614665 (3), Autosomal recessive
GUCY2D	Guanylate cyclase 2D, membrane, retina-specific	600179	Cone-rod dystrophy 6, 601777 (3), Autosomal recessive, Autosomal dominant; Leber congenital amaurosis 1, 204000 (3), Autosomal recessive; Night blindness, congenital stationary, type 1I, 618555 (3), Autosomal recessive; ?Choroidal dystrophy, central areolar 1, 215500 (3), Autosomal dominant
GUF1	GUF1 homolog, GTPase	617064	?Epileptic encephalopathy, early infantile, 40, 617065 (3), Autosomal recessive
GULOP	Gulonolactone (L-) oxidase pseudogene	240400	Scurvy (3)
GUSB	Glucuronidase, beta-	611499	Mucopolysaccharidosis VII, 253220 (3), Autosomal recessive
GYG1	Glycogenin 1	603942	?Glycogen storage disease XV, 613507 (3), Autosomal recessive; Polyglucosan body myopathy 2, 616199 (3), Autosomal recessive
GYPA	Glycophorin A	617922	[Blood group, MNSs system], 111300 (3); {Malaria, resistance to}, 611162 (3)
GYPB	Glycophorin B	617923	{Malaria, resistance to}, 611162 (3); [Blood group, Ss], 111740 (3)
GYPC	Glycophorin C	110750	{Malaria, resistance to}, 611162 (3); [Blood group, Gerbich], 616089 (3)
GYS1	Glycogen synthase	138570	Glycogen storage disease 0, muscle, 611556 (3), Autosomal recessive
GYS2	Glycogen synthase-2, liver	138571	Glycogen storage disease 0, liver, 240600 (3), Autosomal recessive
GZF1	GDNF-inducible zinc finger protein 1	613842	Joint laxity, short stature, and myopia, 617662 (3), Autosomal recessive
H1-4	Histone 1, H1e	142220	Rahman syndrome, 617537 (3), Autosomal dominant
H19	H19 gene	103280	Wilms tumor 2, 194071 (3), Autosomal dominant, Somatic mutation; Silver-Russell syndrome, 180860 (3), Autosomal dominant; Beckwith-Wiedemann syndrome, 130650 (3), Autosomal dominant
H6PD	Hexose-6-phosphate dehydrogenase	138090	Cortisone reductase deficiency 1, 604931 (3), Autosomal recessive
HAAO	3-hydroxyanthranilate 3,4-dioxygenase	604521	Vertebral, cardiac, renal, and limb defects syndrome 1, 617660 (3), Autosomal recessive
HABP2	Hyaluronan-binding protein 2	603924	{?Thyroid cancer, nonmedullary, 5}, 616535 (3), Autosomal dominant; {Venous thromboembolism, susceptibility to}, 188050 (3), Autosomal dominant
HACE1	HECT domain- and ankyrin repeat-containing E3 ubiquitin protein ligase 1	610876	Spastic paraplegia and psychomotor retardation with or without seizures, 616756 (3), Autosomal recessive
HADH	L-3-hydroxyacyl-CoA dehydrogenase, short chain	601609	3-hydroxyacyl-CoA dehydrogenase deficiency, 231530 (3), Autosomal recessive; Hyperinsulinemic hypoglycemia, familial, 4, 609975 (3), Autosomal recessive
HADHA	Hydroxyacyl-Coenzyme A dehydrogenase/3-ketoacyl-Coenzyme A thiolase/ enoyl-Coenzyme A hydratase (trifunctional protein), alpha subunit	600890	LCHAD deficiency, 609016 (3), Autosomal recessive; HELLP syndrome, maternal, of pregnancy, 609016 (3), Autosomal recessive; Fatty liver, acute, of pregnancy, 609016 (3), Autosomal recessive; Trifunctional protein deficiency, 609015 (3), Autosomal recessive
HADHB	Hydroxyacyl-Coenzyme A dehydrogenase/3-ketoacyl-Coenzyme A thiolase /enoyl-Coenzyme A hydratase (trifunctional protein), beta subunit	143450	Trifunctional protein deficiency, 609015 (3), Autosomal recessive
HAGH	Hydroxyacyl glutathione hydrolase; glyoxalase II	138760	[Glyoxalase II deficiency], 614033 (1), Autosomal dominant
HAL	Histidine ammonia-lyase (histidase)	609457	[Histidinemia], 235800 (3), Autosomal recessive, Autosomal dominant
HAMP	Hepcidin antimicrobial peptide	606464	Hemochromatosis, type 2B, 613313 (3), Autosomal recessive
HARS1	Histidyl-tRNA synthetase 1	142810	Charcot-Marie-Tooth disease, axonal, type 2W, 616625 (3), Autosomal dominant; Usher syndrome type 3B, 614504 (3), Autosomal recessive
HARS2	Histidyl-tRNA synthetase 2	600783	?Perrault syndrome 2, 614926 (3), Autosomal recessive
HAVCR2	Hepatitis A virus cellular receptor 2	606652	T-cell lymphoma, subcutaneous panniculitis-like, 618398 (3), Autosomal recessive
HAX1	HCLS1-associated protein X1	605998	Neutropenia, severe congenital 3, autosomal recessive, 610738 (3), Autosomal recessive
HBA1	Hemoglobin alpha-1	141800	Hemoglobin H disease, nondeletional, 613978 (3); Thalassemias, alpha-, 604131 (3); Erythrocytosis, 7, 617981 (3); Methemoglobinemia, alpha type, 617973 (3); Heinz body anemias, alpha-, 140700 (3), Autosomal dominant
HBA2	Hemoglobin alpha-2	141850	Thalassemia, alpha-, 604131 (3); Erythrocytosis 7, 617981 (3); Heinz body anemia, 140700 (3), Autosomal dominant; Hemoglobin H disease, deletional and nondeletional, 613978 (3)
HBB	Hemoglobin beta	141900	Thalassemia, beta, 613985 (3); Methmoglobinemia, beta type, 617971 (3); Erythrocytosis 6, 617980 (3); Heinz body anemia, 140700 (3), Autosomal dominant; Delta-beta thalassemia, 141749 (3), Autosomal dominant; Thalassemia-beta, dominant inclusion-body, 603902 (3); Hereditary persistence of fetal hemoglobin, 141749 (3), Autosomal dominant; {Malaria, resistance to}, 611162 (3); Sickle cell anemia, 6…
HBD	Hemoglobin delta	142000	Thalassemia, delta- (3); Thalassemia due to Hb Lepore (3)
HBEGF	Heparin-binding EGF-like growth factor (diphtheria toxin receptor)	126150	{Diphtheria, susceptibility to} (1)
HBG1	Hemoglobin, gamma A	142200	Fetal hemoglobin quantitative trait locus 1, 141749 (3), Autosomal dominant
HBG2	Hemoglobin, gamma G	142250	Fetal hemoglobin quantitative trait locus 1, 141749 (3), Autosomal dominant; Cyanosis, transient neonatal, 613977 (3), Autosomal dominant
HCCS	Holocytochrome c synthase (cytochrome c heme-lyase)	300056	Linear skin defects with multiple congenital anomalies 1, 309801 (3), X-linked dominant
HCFC1	Host cell factor C1 (VP16-accessory protein)	300019	Mental retardation, X-linked 3 (methylmalonic acidemia and homocysteinemia, cblX type ), 309541 (3), X-linked recessive
HCN1	Hyperpolarization-activated cyclic nucleotide-gated potassium channel 1	602780	Generalized epilepsy with febrile seizures plus, type 10, 618482 (3), Autosomal dominant; Epileptic encephalopathy, early infantile, 24, 615871 (3), Autosomal dominant
HCN4	Hyperpolarization-activated cyclic nucleotide-gated potassium channel 4	605206	Brugada syndrome 8, 613123 (3); Sick sinus syndrome 2, 163800 (3), Autosomal dominant
HCRT	Hypocretin	602358	?Narcolepsy 1, 161400 (3), Autosomal dominant
HDAC6	Histone deacetylase 6	300272	?Chondrodysplasia with platyspondyly, distinctive brachydactyly, hydrocephaly, and microphthalmia, 300863 (3), X-linked dominant
HDAC8	Histone deacetylase 8	300269	Cornelia de Lange syndrome 5, 300882 (3), X-linked dominant
HDC	Histidine decarboxylase	142704	{Gilles de la Tourette syndrome, susceptibility to}, 137580 (3), Autosomal dominant
HECW2	HECT, C2, and WW domains-containing E3 ubiquitin-protein ligase 2	617245	Neurodevelopmental disorder with hypotonia, seizures, and absent language, 617268 (3), Autosomal dominant
HELLS	Helicase, lymphoid-specific	603946	Immunodeficiency-centromeric instability-facial anomalies syndrome 4, 616911 (3), Autosomal recessive
HEPACAM	Hepatocyte cell adhesion molecule	611642	Megalencephalic leukoencephalopathy with subcortical cysts 2A, 613925 (3), Autosomal recessive; Megalencephalic leukoencephalopathy with subcortical cysts 2B, remitting, with or without mental retardation, 613926 (3), Autosomal dominant
HEPHL1	Hephaestin-like protein 1	618455	?Abnormal hair, joint laxity, and developmental delay, 261990 (3), Autosomal recessive
HERC1	HECT domain and RCC1-like domain 1	605109	Macrocephaly, dysmorphic facies, and psychomotor retardation, 617011 (3), Autosomal recessive
HERC2	HECT domain and RCC1-like domain 2	605837	[Skin/hair/eye pigmentation 1, blue/nonblue eyes], 227220 (3), Autosomal recessive; Mental retardation, autosomal recessive 38, 615516 (3), Autosomal recessive; [Skin/hair/eye pigmentation 1, blond/brown hair], 227220 (3), Autosomal recessive
HES7	Hes family bHLH transcription factor 7	608059	Spondylocostal dysostosis 4, autosomal recessive, 613686 (3), Autosomal recessive
HESX1	Homeo box gene expressed in ES cells	601802	Pituitary hormone deficiency, combined, 5, 182230 (3), Autosomal recessive, Autosomal dominant; Septooptic dysplasia, 182230 (3), Autosomal recessive, Autosomal dominant; Growth hormone deficiency with pituitary anomalies, 182230 (3), Autosomal recessive, Autosomal dominant
HEXA	Hexosaminidase A, alpha polypeptide	606869	GM2-gangliosidosis, several forms, 272800 (3), Autosomal recessive; Tay-Sachs disease, 272800 (3), Autosomal recessive; [Hex A pseudodeficiency], 272800 (3), Autosomal recessive
HEXB	Hexosaminidase B, beta polypeptide	606873	Sandhoff disease, infantile, juvenile, and adult forms, 268800 (3), Autosomal recessive
HFE	Hemochromatosis gene	613609	{Porphyria variegata, susceptibility to}, 176200 (3), Autosomal dominant; {Microvascular complications of diabetes 7}, 612635 (3); {Porphyria cutanea tarda, susceptibility to}, 176100 (3), Autosomal recessive, Autosomal dominant; [Transferrin serum level QTL2], 614193 (3); {Alzheimer disease, susceptibility to}, 104300 (3), Autosomal dominant; Hemochromatosis, 235200 (3), Autosomal recessive
HFM1	Helicase for meiosis 1	615684	Premature ovarian failure 9, 615724 (3), Autosomal recessive
HGD	Homogentisate 1,2-dioxygenase (homogentisate oxidase)	607474	Alkaptonuria, 203500 (3), Autosomal recessive
HGF	Hepatic growth factor	142409	Deafness, autosomal recessive 39, 608265 (3), Autosomal recessive
HGSNAT	Heparan-alpha-glucosaminide N-acetyltransferase	610453	Retinitis pigmentosa 73, 616544 (3), Autosomal recessive; Mucopolysaccharidosis type IIIC (Sanfilippo C), 252930 (3), Autosomal recessive
HIBCH	3-hydroxyisobutyryl-CoA hydrolase	610690	3-hydroxyisobutryl-CoA hydrolase deficiency, 250620 (3), Autosomal recessive
HIKESHI	Hikeshi	614908	Leukodystrophy, hypomyelinating, 13, 616881 (3), Autosomal recessive
HINT1	Histidine triad nucleotide-binding protein 1 (protein kinase C inhibitor 1)	601314	Neuromyotonia and axonal neuropathy, autosomal recessive, 137200 (3), Autosomal recessive
HIVEP2	Human immunodeficiency virus type I enhancer-binding protein-2	143054	Mental retardation, autosomal dominant 43, 616977 (3), Autosomal dominant
HJV	Hemojuvelin	608374	Hemochromatosis, type 2A, 602390 (3), Autosomal recessive
HK1	Hexokinase-1	142600	Hemolytic anemia due to hexokinase deficiency, 235700 (3), Autosomal recessive; Neuropathy, hereditary motor and sensory, Russe type, 605285 (3), Autosomal recessive; Neurodevelopmental disorder with visual defects and brain anomalies, 618547 (3), Autosomal dominant; Retinitis pigmentosa 79, 617460 (3), Autosomal dominant
HLA-A	Major histocompatibility complex, class I, A	142800	{Hypersensitivity syndrome, carbamazepine-induced, susceptibility to}, 608579 (3)
HLA-B	Major histocompatibility complex, class I, B	142830	{Stevens-Johnson syndrome, susceptibility to}, 608579 (3); {Spondyloarthropathy, susceptibility to, 1}, 106300 (3), Multifactorial; {Abacavir hypersensitivity, susceptibility to} (3); {Drug-induced liver injury due to flucloxacillin} (3); {Synovitis, chronic, susceptibility to} (3); {Toxic epidermal necrolysis, susceptibility to}, 608579 (3)
HLA-C	Major histocompatibility complex, class I, C	142840	{Psoriasis susceptibility 1}, 177900 (3), Multifactorial; {HIV-1 viremia, susceptibility to}, 609423 (3)
HLA-DPB1	Major histocompatibility complex, class II, DP beta-1	142858	{Beryllium disease, chronic, susceptibility to} (3)
HLA-DQA1	Major histocompatibility complex, class II, DQ alpha-1	146880	{Celiac disease, susceptibility to}, 212750 (3), Autosomal recessive, Multifactorial
HLA-DQB1	Major histocompatibility complex, class II, DQ beta-1	604305	{Multiple sclerosis, susceptibility to, 1}, 126200 (3), Multifactorial; {Celiac disease, susceptibility to}, 212750 (3), Autosomal recessive, Multifactorial; {Creutzfeldt-Jakob disease, variant, resistance to}, 123400 (3), Autosomal dominant
HLA-DRB1	Major histocompatibility complex, class II, DR beta-1	142857	{Sarcoidosis, susceptibility to, 1}, 181000 (3), Autosomal dominant; {Multiple sclerosis, susceptibility to, 1}, 126200 (3), Multifactorial
HLA-G	HLA-G histocompatibility antigen, class I	142871	{Asthma, susceptibility to}, 600807 (2), Autosomal dominant
HLCS	Holocarboxylase synthetase	609018	Holocarboxylase synthetase deficiency, 253270 (3), Autosomal recessive
HMBS	Hydroxymethylbilane synthase	609806	Porphyria, acute intermittent, 176000 (3), Autosomal dominant; Porphyria, acute intermittent, nonerythroid variant, 176000 (3), Autosomal dominant
HMCN1	Hemicentin (fibulin 6)	608548	{Macular degeneration, age-related, 1}, 603075 (3), Autosomal dominant
HMGA1	High-mobility group AT-hook 1	600701	{Diabetes mellitus, noninsulin-dependent, susceptibility to}, 125853 (3), Autosomal dominant
HMGA2	High-mobility group AT-hook 2	600698	Leiomyoma, uterine, somatic, 150699 (1)
HMGB3	High-mobility group box 3 (high mobility group protein 4)	300193	?Microphthalmia, syndromic 13, 300915 (3), X-linked
HMGCL	3-hydroxy-3-methylglutaryl-Coenzyme A lyase	613898	HMG-CoA lyase deficiency, 246450 (3), Autosomal recessive
HMGCR	3-hydroxy-3-methylglutaryl-Coenzyme A reductase; HMG CoA reductase	142910	[Statins, attenuated cholesterol lowering by] (3); [Low density lipoprotein cholesterol level QTL 3] (3)
HMGCS2	3-hydroxy-3-methylglutaryl-Coenzyme A synthase 2, mitochondrial	600234	HMG-CoA synthase-2 deficiency, 605911 (3), Autosomal recessive
HMMR	Hyaluronan-mediated motility receptor (RHAMM)	600936	{Breast cancer, susceptibility to}, 114480 (3), Autosomal dominant, Somatic mutation
HMOX1	Heme oxygenase 1	141250	{Pulmonary disease, chronic obstructive, susceptibility to}, 606963 (3); Heme oxygenase-1 deficiency, 614034 (3)
HMX1	Homeo box (H6 family) 1	142992	Oculoauricular syndrome, 612109 (3), Autosomal recessive
HNF1A	HNF1 homeobox B	142410	{Diabetes mellitus, insulin-dependent}, 222100 (3), Autosomal recessive; MODY, type III, 600496 (3), Autosomal dominant; Hepatic adenoma, somatic, 142330 (3); Renal cell carcinoma, 144700 (3); Diabetes mellitus, insulin-dependent, 20, 612520 (3); {Diabetes mellitus, noninsulin-dependent, 2}, 125853 (3), Autosomal dominant
HNF1B	HNF1 homeobox B (transcription factor 2)	189907	Diabetes mellitus, noninsulin-dependent, 125853 (3), Autosomal dominant; Renal cysts and diabetes syndrome, 137920 (3), Autosomal dominant; {Renal cell carcinoma}, 144700 (3)
HNF4A	Hepatocyte nuclear factor 4, alpha (transcription factor-14)	600281	{Diabetes mellitus, noninsulin-dependent}, 125853 (3), Autosomal dominant; MODY, type I, 125850 (3), Autosomal dominant; Fanconi renotubular syndrome 4, with maturity-onset diabetes of the young, 616026 (3), Autosomal dominant
HNMT	Histamine N-methyltransferase	605238	{Asthma, susceptibility to}, 600807 (3), Autosomal dominant; Mental retardation, autosomal recessive 51, 616739 (3), Autosomal recessive
HNRNPA1	Heterogeneous nuclear ribonucleoprotein A1	164017	Amyotrophic lateral sclerosis 20, 615426 (3), Autosomal dominant; ?Inclusion body myopathy with early-onset Paget disease without frontotemporal dementia 3, 615424 (3), Autosomal dominant
HNRNPA2B1	Heterogeneous nuclear ribonucleoprotein A2/B1	600124	?Inclusion body myopathy with early-onset Paget disease with or without frontotemporal dementia 2, 615422 (3)
HNRNPDL	Heterogeneous nuclear ribonucleoprotein D-like protein	607137	Muscular dystrophy, limb-girdle, autosomal dominant 3, 609115 (3), Autosomal dominant
HNRNPH2	Heterogeneous nuclear ribonucleoprotein H2	300610	Mental retardation, X-linked, syndromic, Bain type, 300986 (3), X-linked dominant
HNRNPK	Heterogeneous nuclear ribonucleoprotein K	600712	Au-Kline syndrome, 616580 (3), Autosomal dominant
HNRNPU	Heterogeneous nuclear ribonucleoprotein U	602869	Epileptic encephalopathy, early infantile, 54, 617391 (3), Autosomal dominant
HOGA1	4-hydroxy-2-oxoglutarate aldolase 1	613597	Hyperoxaluria, primary, type III, 613616 (3)
HOMER2	Homer, homolog 2 (Drosophila)	604799	?Deafness, autosomal dominant 68, 616707 (3), Autosomal dominant
HOXA1	Homeo box-A1	142955	Athabaskan brainstem dysgenesis syndrome, 601536 (3); Bosley-Salih-Alorainy syndrome, 601536 (3)
HOXA11	Homeo box-A11	142958	Radioulnar synostosis with amegakaryocytic thrombocytopenia 1, 605432 (3), Autosomal dominant
HOXA13	Homeo box-A13	142959	?Guttmacher syndrome, 176305 (3), Autosomal dominant; Hand-foot-uterus syndrome, 140000 (3), Autosomal dominant
HOXA2	Homeobox A2	604685	Microtia with or without hearing impairment (AD), 612290 (3), Autosomal recessive, Autosomal dominant; ?Microtia, hearing impairment, and cleft palate (AR), 612290 (3), Autosomal recessive, Autosomal dominant
HOXB1	Homeo box-B1	142968	Facial paresis, hereditary congenital, 3, 614744 (3), Autosomal recessive
HOXB13	Homeo box B13	604607	{Prostate cancer, hereditary, 9}, 610997 (3)
HOXC13	Homeo box-C13	142976	Ectodermal dysplasia 9, hair/nail type, 614931 (3), Autosomal recessive
HOXD10	Homeo box-D10	142984	Charcot-Marie-Tooth disease, foot deformity of, 192950 (3), Autosomal dominant; Vertical talus, congenital, 192950 (3), Autosomal dominant
HOXD13	Homeo box-D13	142989	Brachydactyly, type D, 113200 (3), Autosomal dominant; Brachydactyly, type E, 113300 (3), Autosomal dominant; ?Brachydactyly-syndactyly syndrome, 610713 (3); Syndactyly, type V, 186300 (3), Autosomal dominant; Synpolydactyly 1, 186000 (3), Autosomal dominant
HP	Haptoglobin	140100	[Hypohaptoglobinemia], 614081 (3); [Anhaptoglobinemia], 614081 (3)
HPCA	Hippocalcin, 23kD, Ca2+-binding protein	142622	Dystonia 2, torsion, autosomal recessive, 224500 (3), Autosomal recessive
HPD	4-hydroxyphenylpyruvate dioxygenase	609695	Tyrosinemia, type III, 276710 (3), Autosomal recessive; Hawkinsinuria, 140350 (3), Autosomal dominant
HPGD	Hydroxyprostaglandin dehydrogenase 15-(NAD)	601688	Digital clubbing, isolated congenital, 119900 (3), Autosomal recessive; Hypertrophic osteoarthropathy, primary, autosomal recessive 1, 259100 (3), Autosomal recessive; Cranioosteoarthropathy, 259100 (3), Autosomal recessive
HPRT1	Hypoxanthine phosphoribosyltransferase 1	308000	HPRT-related gout, 300323 (3), X-linked recessive; Lesch-Nyhan syndrome, 300322 (3), X-linked recessive
HPS1	HPS gene 1	604982	Hermansky-Pudlak syndrome 1, 203300 (3), Autosomal recessive
HPS3	HPS gene 3	606118	Hermansky-Pudlak syndrome 3, 614072 (3), Autosomal recessive
HPS4	HPS gene 4	606682	Hermansky-Pudlak syndrome 4, 614073 (3), Autosomal recessive
HPS5	HPS gene 5 (ruby-eye 2, mouse, homolog of)	607521	Hermansky-Pudlak syndrome 5, 614074 (3), Autosomal recessive
HPS6	HPS gene 6	607522	Hermansky-Pudlak syndrome 6, 614075 (3), Autosomal recessive
HPSE2	Heparanase 2	613469	Urofacial syndrome 1, 236730 (3), Autosomal recessive
HR	HR lysine demethylase and nuclear receptor corepressor	602302	Hypotrichosis 4, 146550 (3), Autosomal dominant; Alopecia universalis, 203655 (3), Autosomal recessive; Atrichia with papular lesions, 209500 (3), Autosomal recessive
HRAS	Harvey rat sarcoma viral (v-Ha-ras) oncogene homolog	190020	Nevus sebaceous or woolly hair nevus, somatic, 162900 (3); Congenital myopathy with excess of muscle spindles, 218040 (3), Autosomal dominant; Bladder cancer, somatic, 109800 (3); Thyroid carcinoma, follicular, somatic, 188470 (3); Schimmelpenning-Feuerstein-Mims syndrome, somatic mosaic, 163200 (3); Spitz nevus or nevus spilus, somatic, 137550 (3); Costello syndrome, 218040 (3), Autosomal domina…
HRG	Histidine-rich glycoprotein	142640	Thrombophilia due to elevated HRG, 613116 (1), Autosomal dominant; Thrombophilia due to HRG deficiency, 613116 (3), Autosomal dominant
HS6ST1	Heparan sulfate 6-O-sulfotransferase 1	604846	{Hypogonadotropic hypogonadism 15 with or without anosmia}, 614880 (3), Autosomal dominant
HS6ST2	Heparan sulfate 6-O-sulfotransferase 2	300545	?Paganini-Miozzo syndrome, 301025 (3), X-linked recessive
HSD11B1	Hydroxysteroid, 11-beta, dehydrogenase 1	600713	Cortisone reductase deficiency 2, 614662 (3), Autosomal dominant
HSD11B2	Hydroxysteroid (11-beta) dehydrogenase 2	614232	Apparent mineralocorticoid excess, 218030 (3), Autosomal recessive
HSD17B10	17-beta-hydroxysteroid dehydrogenase X	300256	HSD10 mitochondrial disease, 300438 (3), X-linked dominant
HSD17B3	Hydroxysteroid (17-beta) dehydrogenase 3	605573	Pseudohermaphroditism, male, with gynecomastia, 264300 (3), Autosomal recessive
HSD17B4	Hydroxysteroid (17-beta) dehydrogenase 4	601860	D-bifunctional protein deficiency, 261515 (3), Autosomal recessive; Perrault syndrome 1, 233400 (3), Autosomal recessive
HSD3B2	Hydroxy-delta-5-steroid dehydrogenase, 3 beta- and steroid delta-isomerase, type 2 (adrenal, gonadal)	613890	Adrenal hyperplasia, congenital, due to 3-beta-hydroxysteroid dehydrogenase 2 deficiency, 201810 (3), Autosomal recessive
HSD3B7	3-beta-hydroxy-delta-5-C27-steroid oxidoreductase	607764	Bile acid synthesis defect, congenital, 1, 607765 (3), Autosomal recessive
HSF4	Heat-shock transcription factor 4	602438	Cataract 5, multiple types, 116800 (3), Autosomal dominant
HSPA9	Heat-shock 70kD protein-9 (mortalin)	600548	Even-plus syndrome, 616854 (3), Autosomal recessive; Anemia, sideroblastic, 4, 182170 (3), Autosomal dominant
HSPB1	Heat-shock 27kD protein-1	602195	Charcot-Marie-Tooth disease, axonal, type 2F, 606595 (3), Autosomal dominant; Neuropathy, distal hereditary motor, type IIB, 608634 (3), Autosomal dominant
HSPB3	Heat-shock 27kD protein 3	604624	?Neuronopathy, distal hereditary motor, type IIC, 613376 (3), Autosomal dominant
HSPB8	Heat-shock 22-kD protein 8	608014	Neuropathy, distal hereditary motor, type IIA, 158590 (3), Autosomal dominant; Charcot-Marie-Tooth disease, axonal, type 2L, 608673 (3), Autosomal dominant
HSPD1	Heat-shock 60kD protein 1	118190	Spastic paraplegia 13, autosomal dominant, 605280 (3), Autosomal dominant; Leukodystrophy, hypomyelinating, 4, 612233 (3), Autosomal recessive
HSPG2	Heparan sulfate proteoglycan of basement membrane (perlecan)	142461	Dyssegmental dysplasia, Silverman-Handmaker type, 224410 (3), Autosomal recessive; Schwartz-Jampel syndrome, type 1, 255800 (3), Autosomal recessive
HTR1A	5-hydroxytryptamine (serotonin) receptor-1A	109760	Periodic fever, menstrual cycle dependent, 614674 (3), Autosomal dominant
HTR2A	5-hydroxytryptamine (serotonin) receptor-2A	182135	{Major depressive disorder, response to citalopram therapy in}, 608516 (3); {Alcohol dependence, susceptibility to}, 103780 (3), Multifactorial; {Schizophrenia, susceptibility to}, 181500 (3), Autosomal dominant; {Anorexia nervosa, susceptibility to}, 606788 (3); {Obsessive-compulsive disorder, susceptibility to}, 164230 (3), Autosomal dominant; {Seasonal affective disorder, susceptibility to}, 6…
HTRA1	HTRA serine peptidase 1	602194	{Macular degeneration, age-related, neovascular type}, 610149 (3); {Macular degeneration, age-related, 7}, 610149 (3); Cerebral arteriopathy, autosomal dominant, with subcortical infarcts and leukoencephalopathy, type 2, 616779 (3), Autosomal dominant; CARASIL syndrome, 600142 (3), Autosomal recessive
HTRA2	HTRA serine peptidase 2	606441	{Parkinson disease 13}, 610297 (3); 3-methylglutaconic aciduria, type VIII, 617248 (3), Autosomal recessive
HTT	Huntingtin	613004	Huntington disease, 143100 (3), Autosomal dominant; Lopes-Maciel-Rodan syndrome, 617435 (3), Autosomal recessive
HUWE1	HECT, UBA, and WWE domains-containing protein 1	300697	Mental retardation, X-linked syndromic, Turner type, 309590 (3), X-linked
HYAL1	Hyaluronoglucosaminidase 1	607071	?Mucopolysaccharidosis type IX, 601492 (3), Autosomal recessive
HYDIN	HYDIN axonemal central pair apparatus protein	610812	Ciliary dyskinesia, primary, 5, 608647 (3), Autosomal recessive
HYLS1	HYLS1 gene	610693	Hydrolethalus syndrome, 236680 (3), Autosomal recessive
HYOU1	Hypoxia-upregulated 1	601746	?Immunodeficiency 59 and hypoglycemia, 233600 (3), Autosomal recessive
IARS1	Isoleucine-tRNA synthetase 1	600709	Growth retardation, impaired intellectual development, hypotonia, and hepatopathy, 617093 (3), Autosomal recessive
IARS2	Isoleucyl-tRNA synthetase 2	612801	?Cataracts, growth hormone deficiency, sensory neuropathy, sensorineural hearing loss, and skeletal dysplasia, 616007 (3), Autosomal recessive
IBA57	Iron-sulfur cluster assembly factor IBA57	615316	?Spastic paraplegia 74, autosomal recessive, 616451 (3), Autosomal recessive; Multiple mitochondrial dysfunctions syndrome 3, 615330 (3), Autosomal recessive
ICAM1	Intercellular adhesion molecule-1	147840	{Malaria, cerebral, susceptibility to}, 611162 (3)
ICAM4	Intracellular adhesion molecule 4	614088	[Blood group, Landsteiner-Wiener], 111250 (3)
ICOS	Inducible costimulator	604558	Immunodeficiency, common variable, 1, 607594 (3), Autosomal recessive
IDH1	Isocitrate dehydrogenase, soluble	147700	{Glioma, susceptibility to, somatic}, 137800 (3)
IDH2	Isocitrate dehydrogenase, mitochondrial	147650	D-2-hydroxyglutaric aciduria 2, 613657 (3)
IDH3B	Isocitrate dehydrogenase 3, beta subunit	604526	Retinitis pigmentosa 46, 612572 (3)
IDS	Iduronate 2-sulfatase (Hunter syndrome)	300823	Mucopolysaccharidosis II, 309900 (3), X-linked recessive
IDUA	Iduronidase, alpha-L-	252800	Mucopolysaccharidosis Ih/s, 607015 (3), Autosomal recessive; Mucopolysaccharidosis Ih, 607014 (3), Autosomal recessive; Mucopolysaccharidosis Is, 607016 (3), Autosomal recessive
IER3IP1	Immediate-early response 3-interacting protein 1	609382	Microcephaly, epilepsy, and diabetes syndrome, 614231 (3), Autosomal recessive
IFIH1	Interferon induced with helicase C domain 1	606951	Aicardi-Goutieres syndrome 7, 615846 (3), Autosomal dominant; Singleton-Merten syndrome 1, 182250 (3), Autosomal dominant
IFITM3	Interferon-induced transmembrane protein 3	605579	{Influenza, severe, susceptibility to}, 614680 (3)
IFITM5	Interferon-induced transmembrane protein 5	614757	Osteogenesis imperfecta, type V, 610967 (3), Autosomal dominant
IFNA1	Interferon, alpha-1	147660	Interferon, alpha, deficiency (1)
IFNAR2	Interferon, alpha, beta, and omega, receptor 2	602376	?Immunodeficiency 45, 616669 (3), Autosomal recessive; {Hepatitis B virus, susceptibility to}, 610424 (3)
IFNG	Interferon, gamma	147570	{AIDS, rapid progression to}, 609423 (3); {TSC2 angiomyolipomas, renal, modifier of}, 613254 (3), Autosomal dominant; {Hepatitis C virus, response to therapy of}, 609532 (3); {Aplastic anemia}, 609135 (3); {Tuberculosis, protection against}, 607948 (3)
IFNGR1	Immune interferon, receptor for	107470	Immunodeficiency 27A, mycobacteriosis, AR, 209950 (3), Autosomal recessive; {Tuberculosis infection, protection against}, 607948 (3); {Tuberculosis, susceptibility to}, 607948 (3); Immunodeficiency 27B, mycobacteriosis, AD, 615978 (3), Autosomal dominant; {H. pylori infection, susceptibility to}, 600263 (3); {Hepatitis B virus infection, susceptibility to}, 610424 (3)
IFNGR2	Interferon gamma receptor-2 (interferon gamma transducer 1)	147569	Immunodeficiency 28, mycobacteriosis, 614889 (3), Autosomal recessive
IFNL3	Interferon, lambda 3	607402	{Hepatitis C virus infection, response to therapy of}, 609532 (3)
IFT122	Intraflagellar transport 122	606045	Cranioectodermal dysplasia 1, 218330 (3), Autosomal recessive
IFT140	Intraflagellar transport 140	614620	Retinitis pigmentosa 80, 617781 (3), Autosomal recessive; Short-rib thoracic dysplasia 9 with or without polydactyly, 266920 (3), Autosomal recessive
IFT172	Intraflagellar transport 172	607386	Retinitis pigmentosa 71, 616394 (3), Autosomal recessive; Short-rib thoracic dysplasia 10 with or without polydactyly, 615630 (3), Autosomal recessive
IFT27	Intraflagellar transport 27	615870	?Bardet-Biedl syndrome 19, 615996 (3), Autosomal recessive
IFT43	Intraflagellar transport 43	614068	?Cranioectodermal dysplasia 3, 614099 (3), Autosomal recessive; Short-rib thoracic dysplasia 18 with polydactyly, 617866 (3), Autosomal recessive; ?Retinitis pigmentosa 81, 617871 (3), Autosomal recessive
IFT52	Intraflagellar transport 52	617094	Short-rib thoracic dysplasia 16 with or without polydactyly, 617102 (3), Autosomal recessive
IFT57	Intraflagellar transport 57 (HIP1 protein interactor)	606621	?Orofaciodigital syndrome XVIII, 617927 (3), Autosomal recessive
IFT74	Intraflagellar transport 74	608040	?Bardet-Biedl syndrome 20, 617119 (3), Autosomal recessive
IFT80	Intraflagellar transport 80	611177	Short-rib thoracic dysplasia 2 with or without polydactyly, 611263 (3), Autosomal recessive
IFT81	Intraflagellar transport 81	605489	Short-rib thoracic dysplasia 19 with or without polydactyly, 617895 (3), Autosomal recessive
IGBP1	Immunoglobulin-binding protein 1	300139	Corpus callosum, agenesis of, with mental retardation, ocular coloboma and micrognathia, 300472 (3), X-linked recessive
IGF1	Insulin-like growth factor-1, or somatomedin C	147440	Growth retardation with deafness and mental retardation due to IGF1 deficiency, 608747 (3), Autosomal recessive
IGF1R	Insulin-like growth factor-1 receptor	147370	Insulin-like growth factor I, resistance to, 270450 (3), Autosomal recessive, Autosomal dominant
IGF2	Insulin-like growth factor-2, or somatomedin A	147470	?Growth restriction, severe, with distinctive facies, 616489 (3), Autosomal dominant
IGF2BP2	Insulin-like growth factor 2 mRNA-binding protein 2	608289	{Diabetes mellitus, noninsulin-dependent, susceptibility to}, 125853 (3), Autosomal dominant
IGF2R	Insulin-like growth factor-2 receptor (mannose-6-phosphate receptor, cation-independent)	147280	Hepatocellular carcinoma, somatic, 114550 (3)
IGFALS	Insulin-like growth factor-binding protein, acid-labile subunit	601489	Acid-labile subunit, deficiency of, 615961 (3)
IGFBP7	Insulin-like growth factor-binding protein-7	602867	Retinal arterial macroaneurysm with supravalvular pulmonic stenosis, 614224 (3), Autosomal recessive
IGHG2	Constant region of heavy chain of IgG2	147110	IgG2 deficiency, selective (3)
IGHM	Constant region of heavy chain of IgM	147020	Agammaglobulinemia 1, 601495 (3), Autosomal recessive
IGHMBP2	Immunoglobulin mu binding protein 2	600502	Neuronopathy, distal hereditary motor, type VI, 604320 (3), Autosomal recessive; Charcot-Marie-Tooth disease, axonal, type 2S, 616155 (3), Autosomal recessive
IGKC	Immunoglobulin kappa constant region	147200	Kappa light chain deficiency, 614102 (3), Autosomal recessive
IGLL1	Immunoglobulin lambda-like polypeptide 1 (immunoglobulin omega peptide)	146770	Agammaglobulinemia 2, 613500 (3), Autosomal recessive
IGSF1	Immunoglobulin superfamily, member 1	300137	Hypothyroidism, central, and testicular enlargement, 300888 (3), X-linked recessive
IGSF3	Immunoglobulin superfamily, member 3	603491	?Lacrimal duct defect, 149700 (3), Autosomal recessive
IHH	Indian hedgehog	600726	Acrocapitofemoral dysplasia, 607778 (3), Autosomal recessive; Brachydactyly, type A1, 112500 (3), Autosomal dominant
IKBKB	Inhibitor of kappa light polypeptide gene enhancer in B cells, kinase of, beta	603258	Immunodeficiency 15A, 618204 (3), Autosomal dominant; Immunodeficiency 15B, 615592 (3), Autosomal recessive
IKBKG	Inhibitor of kappa light polypeptide gene enhancer in B cells, kinase of, gamma (NF-kappa-B essential modulator)	300248	Immunodeficiency 33, 300636 (3), X-linked recessive; Incontinentia pigmenti, 308300 (3), X-linked dominant; Immunodeficiency, isolated, 300584 (3); Ectodermal dysplasia and immunodeficiency 1, 300291 (3); Invasive pneumococcal disease, recurrent isolated, 2, 300640 (3); Ectodermal, dysplasia, anhidrotic, lymphedema and immunodeficiency, 300301 (3)
IKZF1	Ikaros family zinc finger 1	603023	Immunodeficiency, common variable, 13, 616873 (3), Autosomal dominant
IL10	Interleukin-10	124092	{Graft-versus-host disease, protection against}, 614395 (3); {HIV-1, susceptibility to}, 609423 (3); {Rheumatoid arthritis, progression of}, 180300 (3)
IL10RA	Interleukin-10 receptor, alpha	146933	Inflammatory bowel disease 28, early onset, autosomal recessive, 613148 (3), Autosomal recessive
IL10RB	Cytokine receptor, family II, member 4	123889	{Hepatitis B virus, susceptibility to}, 610424 (3); Inflammatory bowel disease 25, early onset, autosomal recessive, 612567 (3), Autosomal recessive
IL11RA	Interleukin-11 receptor, alpha	600939	Craniosynostosis and dental anomalies, 614188 (3), Autosomal recessive
IL12B	Interleukin-12B (natural killer cell stimulatory factor-2, cytotoxic lymphocyte maturation factor-2, p40)	161561	Immunodeficiency 29, mycobacteriosis, 614890 (3), Autosomal recessive
IL12RB1	Interleukin-12 receptor, beta-1	601604	Immunodeficiency 30, 614891 (3), Autosomal recessive
IL13	Interleukin-13	147683	{Allergic rhinitis, susceptibility to}, 607154 (3); {Asthma, susceptibility to}, 600807 (3), Autosomal dominant
IL17F	Interleukin 17F	606496	?Candidiasis, familial, 6, autosomal dominant, 613956 (3)
IL17RA	Interleukin 17 receptor A	605461	Immunodeficiency 51, 613953 (3), Autosomal recessive
IL17RC	Interleukin 17 receptor C	610925	Candidiasis, familial, 9, 616445 (3), Autosomal recessive
IL17RD	Interleukin 17, receptor D (Sef, zebrafish, homolog of)	606807	Hypogonadotropic hypogonadism 18 with or without anosmia, 615267 (3), Autosomal recessive, Autosomal dominant, Digenic dominant
IL18BP	Interleukin 18-binding protein	604113	{?Hepatitis, fulminant viral, susceptibility to}, 618549 (3), Autosomal recessive
IL1B	Interleukin-1, beta	147720	{Gastric cancer risk after H. pylori infection}, 137215 (3), Autosomal dominant
IL1RAPL1	Il-1 receptor accessory protein-like 1	300206	Mental retardation, X-linked 21/34, 300143 (3), X-linked recessive
IL1RN	Interleukin-1 receptor antagonist	147679	{Gastric cancer risk after H. pylori infection}, 137215 (3), Autosomal dominant; {Microvascular complications of diabetes 4}, 612628 (3); Interleukin 1 receptor antagonist deficiency, 612852 (3), Autosomal recessive
IL21	Interleukin 21	605384	?Immunodeficiency, common variable, 11, 615767 (3), Autosomal recessive
IL21R	Interleukin 21 receptor	605383	[IgE, elevated level of], 147050 (3), Autosomal dominant; Immunodeficiency 56, 615207 (3), Autosomal recessive
IL23R	Interleukin 23 receptor	607562	{Inflammatory bowel disease 17, protection against}, 612261 (3); {Psoriasis, protection against}, 605606 (3)
IL2RA	Interleukin-2 receptor, alpha	147730	Immunodeficiency 41 with lymphoproliferation and autoimmunity, 606367 (3), Autosomal recessive; {Diabetes, mellitus, insulin-dependent, susceptibility to, 10}, 601942 (3)
IL2RB	Interleukin-2 receptor, beta polypeptide	146710	Immunodeficiency 63 with lymphoproliferation and autoimmunity, 618495 (3), Autosomal recessive
IL2RG	Interleukin-2 receptor, gamma	308380	Severe combined immunodeficiency, X-linked, 300400 (3), X-linked recessive; Combined immunodeficiency, X-linked, moderate, 312863 (3), X-linked recessive
IL31RA	Interleukin 31 receptor A	609510	?Amyloidosis, primary localized cutaneous, 2, 613955 (3), Autosomal dominant
IL36RN	Interleukin 36 receptor antagonist	605507	Psoriasis 14, pustular, 614204 (3), Autosomal recessive
IL4R	Interleukin-4 receptor	147781	{Atopy, susceptibility to}, 147050 (3), Autosomal dominant; {AIDS, slow progression to}, 609423 (3)
IL6	Interleukin-6 (interferon, beta-2)	147620	{Intracranial hemorrhage in brain cerebrovascular malformations, susceptibility to}, 108010 (3), Autosomal dominant; {Rheumatoid arthritis, systemic juvenile}, 604302 (3); {Diabetes, susceptibility to},, 222100 (3), Autosomal recessive; {Kaposi sarcoma, susceptibility to}, 148000 (3), Autosomal dominant; {Crohn disease-associated growth failure}, 266600 (3), Multifactorial
IL6R	Interleukin-6 receptor	147880	[Interleukin-6 receptor, soluble, serum level of, QTL], 614689 (3); [Interleukin 6, serum level of, QTL], 614752 (3)
IL6ST	Interleukin-6 signal transducer (gp130, oncostatin M receptor)	600694	Hyper-IgE recurrent infection syndrome 4, autosomal recessive, 618523 (3)
IL7	Interleukin-7	146660	{?Epidermodysplasia verruciformis, susceptibility to, 5}, 618309 (3), Autosomal recessive
IL7R	Interleukin-7 receptor	146661	Severe combined immunodeficiency, T-cell negative, B-cell/natural killer cell-positive type, 608971 (3), Autosomal recessive
ILDR1	Immunoglobulin-like domain-containing receptor 1	609739	Deafness, autosomal recessive 42, 609646 (3), Autosomal recessive
IMPA1	Inositol(myo)-1(or 4)-monophosphatase-1	602064	Mental retardation, autosomal recessive 59, 617323 (3), Autosomal recessive
IMPAD1	Inositol monophosphatase domain-containing protein 1	614010	Chondrodysplasia with joint dislocations, GPAPP type, 614078 (3), Autosomal recessive
IMPDH1	Inosine-5'-monophosphate dehydrogenase, type I	146690	Leber congenital amaurosis 11, 613837 (3), Autosomal dominant; Retinitis pigmentosa 10, 180105 (3), Autosomal dominant
IMPDH2	Inosine-5'-monophosphate dehydrogenase, type II	146691	[IMPDH2 enzyme activity, variation in], 617995 (3)
IMPG1	Interphotoreceptor matrix proteoglycan-1	602870	Macular dystrophy, vitelliform, 4, 616151 (3), Autosomal dominant
IMPG2	Interphotoreceptor matrix proteoglycan 2	607056	Macular dystrophy, vitelliform, 5, 616152 (3), Autosomal dominant; Retinitis pigmentosa 56, 613581 (3), Autosomal recessive
INAVA	Innate immunity activator	618051	{Inflammatory bowel disease 29}, 618077 (3)
INF2	Inverted formin 2	610982	Glomerulosclerosis, focal segmental, 5, 613237 (3); Charcot-Marie-Tooth disease, dominant intermediate E, 614455 (3), Autosomal dominant
ING1	Inhibitor of growth 1	601566	Squamous cell carcinoma, head and neck, somatic, 275355 (3)
INPP5E	Inositol polyphosphate-5-phosphatase, 72kD	613037	Mental retardation, truncal obesity, retinal dystrophy, and micropenis, 610156 (3), Autosomal recessive; Joubert syndrome 1, 213300 (3), Autosomal recessive
INPP5K	Inositol polyphosphate-5-phosphatase K	607875	Muscular dystrophy, congenital, with cataracts and intellectual disability, 617404 (3), Autosomal recessive
INPPL1	Inositol polyphosphate phosphatase-like 1	600829	Opsismodysplasia, 258480 (3), Autosomal recessive
INS	Insulin	176730	Maturity-onset diabetes of the young, type 10, 613370 (3), Autosomal dominant; Hyperproinsulinemia, 616214 (3), Autosomal dominant; Diabetes mellitus, insulin-dependent, 2, 125852 (3), Autosomal dominant; Diabetes mellitus, permanent neonatal, 606176 (3), Autosomal recessive, Autosomal dominant
INSL3	Insulin-like 3, Leydig cell	146738	Cryptorchidism, 219050 (3), Autosomal dominant
INSR	Insulin receptor	147670	Hyperinsulinemic hypoglycemia, familial, 5, 609968 (3), Autosomal dominant; Rabson-Mendenhall syndrome, 262190 (3), Autosomal recessive; Diabetes mellitus, insulin-resistant, with acanthosis nigricans, 610549 (3); Leprechaunism, 246200 (3), Autosomal recessive
INTS1	Integrator complex subunit 1	611345	Neurodevelopmental disorder with cataracts, poor growth, and dysmorphic facies, 618571 (3)
INTS8	Integrator complex subunit 8	611351	?Neurodevelopmental disorder with cerebellar hypoplasia and spasticity, 618572 (3), Autosomal recessive
INTU	Inturned planar cell polarity protein	610621	?Short-rib thoracic dysplasia 20 with polydactyly, 617925 (3), Autosomal recessive; ?Orofaciodigital syndrome XVII, 617926 (3), Autosomal recessive
INVS	Inversin	243305	Nephronophthisis 2, infantile, 602088 (3), Autosomal recessive
IQCB1	IQ motif-containing protein B1	609237	Senior-Loken syndrome 5, 609254 (3), Autosomal recessive
IQCE	IQ domain-containing protein E	617631	?Polydactyly, postaxial, type A7, 617642 (3), Autosomal recessive
IQSEC1	IQ motif- and Sec7 domain-containing protein 1	610166	Intellectual developmental disorder with short stature and behavioral abnormalities, 618687 (3)
IQSEC2	IQ motif- and Sec7 domain-containing protein 2	300522	Mental retardation, X-linked 1/78, 309530 (3), X-linked dominant
IRAK3	Interleukin 1 receptor-associated kinase 3	604459	{Asthma susceptibility 5}, 611064 (3)
IRAK4	Interleukin 1 receptor-associated kinase 4	606883	Invasive pneumococcal disease, recurrent isolated, 1, 610799 (3); IRAK4 deficiency, 607676 (3)
IREB2	Iron-responsive element-binding protein-2	147582	Neurodegeneration, early-onset, with choreoathetoid movements and microcytic anemia, 618451 (3), Autosomal recessive
IRF1	Interferon regulatory factor-1	147575	Gastric cancer, somatic, 613659 (3); Myelogenous leukemia, acute (3); Myelodysplastic syndrome, preleukemic (3); Nonsmall cell lung cancer, somatic, 211980 (3)
IRF2BP2	Interferon regulatory factor 2-binding protein 2	615332	?Immunodeficiency, common variable, 14, 617765 (3), Autosomal dominant
IRF2BPL	Interferon regulatory factor 2-binding protein like	611720	Neurodevelopmental disorder with regression, abnormal movements, loss of speech, and seizures, 618088 (3), Autosomal dominant
IRF3	Interferon regulatory factor 3	603734	{Encephalopathy, acute, infection-induced (herpes-specific), susceptibility to, 7}, 616532 (3), Autosomal dominant
IRF4	Interferon regulatory factor-4	601900	[Skin/hair/eye pigmentation, variation in, 8], 611724 (3)
IRF5	Interferon regulatory factor 5	607218	{Systemic lupus erythematosus, susceptibility to, 10}, 612251 (3); {Inflammatory bowel disease 14}, 612245 (3)
IRF6	Interferon regulatory factor 6	607199	Popliteal pterygium syndrome 1, 119500 (3), Autosomal dominant; {Orofacial cleft 6}, 608864 (3), Autosomal dominant; van der Woude syndrome, 119300 (3), Autosomal dominant
IRF7	Interferon regulatory factor 7	605047	?Immunodeficiency 39, 616345 (3), Autosomal recessive
IRF8	Interferon regulatory factor 8	601565	Immunodeficiency 32B, monocyte and dendritic cell deficiency, autosomal recessive, 226990 (3), Autosomal recessive; Immunodeficiency 32A, mycobacteriosis, autosomal dominant, 614893 (3), Autosomal dominant
IRF9	Interferon regulatory factor 9	147574	Immunodeficiency 65, susceptibility to viral infections, 618648 (3), Autosomal recessive
IRGM	Immunity-related GTPase family, M	608212	{Mycobacterium tuberculosis, protection against}, 607948 (3); {Inflammatory bowel disease (Crohn disease) 19}, 612278 (3)
IRS1	Insulin receptor substrate-1	147545	{Coronary artery disease, susceptibility to} (3); {Diabetes mellitus, noninsulin-dependent}, 125853 (3), Autosomal dominant
IRS2	Insulin receptor substrate 2	600797	{Diabetes mellitus, noninsulin-dependent}, 125853 (3), Autosomal dominant
IRS4	Insulin receptor substrate 4	300904	Hypothyroidism, congenital, nongoitrous, 9, 301035 (3), X-linked recessive
IRX5	Iroquois homeo box protein 5	606195	Hamamy syndrome, 611174 (3), Autosomal recessive
ISCA1	Iron-sulfur cluster assembly 1	611006	Multiple mitochondrial dysfunctions syndrome 5, 617613 (3), Autosomal recessive
ISCA2	Iron-sulfur cluster assembly 2	615317	Multiple mitochondrial dysfunctions syndrome 4, 616370 (3), Autosomal recessive
ISCU	Iron-sulfur cluster scaffold, E. coli, homolog of	611911	Myopathy with lactic acidosis, hereditary, 255125 (3), Autosomal recessive
ISG15	ISG15 ubiquitin-like modifier	147571	Immunodeficiency 38, 616126 (3), Autosomal recessive
ITCH	Itchy, mouse, homolog of	606409	Autoimmune disease, multisystem, with facial dysmorphism, 613385 (3), Autosomal recessive
ITGA2	Integrin, alpha-2 (CD49B; alpha-2 subunit of VLA-2 receptor; platelet antigen Br)	192974	?Glycoprotein Ia deficiency, 614200 (1), Autosomal dominant
ITGA2B	Integrin, alpha-2b (platelet glycoprotein IIb of IIb/IIIa complex, antigen CD41B)	607759	Glanzmann thrombasthenia, 273800 (3), Autosomal recessive; Thrombocytopenia, neonatal alloimmune, BAK antigen related (3); Bleeding disorder, platelet-type, 16, autosomal dominant, 187800 (3), Autosomal dominant
ITGA3	Integrin, alpha-3	605025	Interstitial lung disease, nephrotic syndrome, and epidermolysis bullosa, congenital, 614748 (3), Autosomal recessive
ITGA6	Integrin, alpha-6	147556	Epidermolysis bullosa, junctional, with pyloric stenosis, 226730 (3), Autosomal recessive
ITGA7	Integrin, alpha-7	600536	Muscular dystrophy, congenital, due to ITGA7 deficiency, 613204 (3), Autosomal recessive
ITGA8	Integrin, alpha-8	604063	Renal hypodysplasia/aplasia 1, 191830 (3), Autosomal recessive
ITGB2	Integrin, beta-2 (antigen CD18 (p95), lymphocyte function-associated antigen-1; macrophage antigen, beta polypeptide)	600065	Leukocyte adhesion deficiency, 116920 (3), Autosomal recessive
ITGB3	Integrin, beta-3 (platelet glycoprotein IIIa; antigen CD61)	173470	Purpura, posttransfusion (3); Thrombocytopenia, neonatal alloimmune (3); Bleeding disorder, platelet-type, 16, autosomal dominant, 187800 (3), Autosomal dominant; {Myocardial infarction, susceptibility to}, 608446 (3); Glanzmann thrombasthenia, 273800 (3), Autosomal recessive
ITGB4	Integrin, beta-4	147557	Epidermolysis bullosa of hands and feet, 131800 (3), Autosomal dominant; Epidermolysis bullosa, junctional, with pyloric atresia, 226730 (3), Autosomal recessive; Epidermolysis bullosa, junctional, non-Herlitz type, 226650 (3), Autosomal recessive
ITGB6	Integrin, beta-6	147558	Amelogenesis imperfecta, type IH, 616221 (3), Autosomal recessive
ITK	T-cell-specific tyrosine kinase; homolog of mouse T-cell itk/tsk tyrosine kinase	186973	Lymphoproliferative syndrome 1, 613011 (3), Autosomal recessive
ITM2B	Integral membrane protein 2B (BRI gene)	603904	Dementia, familial British, 176500 (3), Autosomal dominant; ?Retinal dystrophy with inner retinal dysfunction and ganglion cell abnormalities, 616079 (3), Autosomal dominant; Dementia, familial Danish, 117300 (3), Autosomal dominant
ITPA	Inosine triphosphatase-A	147520	[Inosine triphosphatase deficiency], 613850 (3); Epileptic encephalopathy, early infantile, 35, 616647 (3), Autosomal recessive
ITPKC	Inositol 1,4,5-trisphosphate 3-kinase C	606476	{Kawasaki disease, susceptibility to}, 611775 (3)
ITPR1	Inositol 1,4,5-triphosphate receptor, type 1	147265	Spinocerebellar ataxia 29, congenital nonprogressive, 117360 (3), Autosomal dominant; Spinocerebellar ataxia 15, 606658 (3), Autosomal dominant; Gillespie syndrome, 206700 (3), Autosomal recessive, Autosomal dominant
ITPR2	Inositol 1,4,5-triphosphate receptor, type 2	600144	?Anhidrosis, isolated, with normal sweat glands, 106190 (3), Autosomal recessive
ITPR3	Inositol 1,4,5-triphosphate receptor, type 3	147267	{Diabetes, type 1, susceptibility to}, 222100 (2), Autosomal recessive
IVD	Isovaleryl Coenzyme A dehydrogenase	607036	Isovaleric acidemia, 243500 (3), Autosomal recessive
IYD	Iodotyrosine deiodinase	612025	Thyroid dyshormonogenesis 4, 274800 (3), Autosomal recessive
JAG1	Jagged 1	601920	?Deafness, congenital heart defects, and posterior embryotoxon, 617992 (3); Alagille syndrome 1, 118450 (3), Autosomal dominant; Tetralogy of Fallot, 187500 (3), Autosomal dominant
JAGN1	Jagunal homolog 1	616012	Neutropenia, severe congenital, 6, autosomal recessive, 616022 (3), Autosomal recessive
JAK2	Janus kinase 2 (a protein-tyrosine kinase)	147796	Myelofibrosis, somatic, 254450 (3); Thrombocythemia 3, 614521 (3), Autosomal dominant, Somatic mutation; Polycythemia vera, somatic, 263300 (3); {Budd-Chiari syndrome, somatic}, 600880 (3); Leukemia, acute myeloid, somatic, 601626 (3); Erythrocytosis, somatic, 133100 (3)
JAK3	Janus kinase 3 (Janus kinase, leukocyte)	600173	SCID, autosomal recessive, T-negative/B-positive type, 600802 (3), Autosomal recessive
JAM3	Junctional adhesion molecule 3	606871	Hemorrhagic destruction of the brain, subependymal calcification, and cataracts, 613730 (3), Autosomal recessive
JPH1	Junctophilin 1	605266	?Charcot-Marie-Tooth disease, axonal, autosomal dominant, type 2K, 607831 (3), Autosomal recessive, Autosomal dominant
JPH2	Junctophilin 2	605267	Cardiomyopathy, hypertrophic, 17, 613873 (3), Autosomal dominant
JPH3	Junctophilin 3	605268	Huntington disease-like 2, 606438 (3), Autosomal dominant
JUP	Junction plakoglobin	173325	Arrhythmogenic right ventricular dysplasia 12, 611528 (3), Autosomal dominant; Naxos disease, 601214 (3), Autosomal recessive
KANK1	KN motif- and ankyrin repeat domain-containing protein 1	607704	Cerebral palsy, spastic quadriplegic, 2, 612900 (3)
KANK2	KN motif- and ankyrin repeat domain-containing protein 2	614610	Palmoplantar keratoderma and woolly hair, 616099 (3), Autosomal recessive; Nephrotic syndrome, type 16, 617783 (3), Autosomal recessive
KANSL1	KAT8 regulatory NSL complex subunit 1	612452	Koolen-De Vries syndrome, 610443 (3), Autosomal dominant
KARS1	Lysyl-tRNA synthetase 1	601421	?Charcot-Marie-Tooth disease, recessive intermediate, B, 613641 (3), Autosomal recessive; Deafness, autosomal recessive 89, 613916 (3), Autosomal recessive
KAT6A	K(lysine) acetyltransferase 6A	601408	Mental retardation, autosomal dominant 32, 616268 (3), Autosomal dominant
KAT6B	Lysine acetyltransferase 6B	605880	SBBYSS syndrome, 603736 (3), Autosomal dominant; Genitopatellar syndrome, 606170 (3), Autosomal dominant
KATNB1	Katanin, p80 subunit, B1	602703	Lissencephaly 6, with microcephaly, 616212 (3), Autosomal recessive
KBTBD13	Kelch repeat and BTB/POZ domains-containing protein 13	613727	Nemaline myopathy 6, autosomal dominant, 609273 (3), Autosomal dominant
KCNA1	Potassium voltage-gated channel, shaker-related subfamily, member 1	176260	Episodic ataxia/myokymia syndrome, 160120 (3), Autosomal dominant
KCNA2	Potassium channel, voltage-gated, Shaker-related subfamily, member 2	176262	Epileptic encephalopathy, early infantile, 32, 616366 (3), Autosomal dominant
KCNA4	Potassium voltage-gated channel, shaker-related subfamily, member 4	176266	Microcephaly, cataracts, impaired intellectual development, and dystonia with abnormal striatum, 618284 (3), Autosomal recessive
KCNA5	Potassium voltage-gated channel, shaker-related subfamily, member 5	176267	Atrial fibrillation, familial, 7, 612240 (3), Autosomal dominant
KCNB1	Potassium voltage-gated channel, Shab-related subfamily, member 1	600397	Epileptic encephalopathy, early infantile, 26, 616056 (3), Autosomal dominant
KCNC1	Potassium voltage-gated channel, Shaw-related subfamily, member 1	176258	Epilepsy, progressive myoclonic 7, 616187 (3), Autosomal dominant
KCNC3	Potassium voltage-gated channel, Shaw-related subfamily, member 3	176264	Spinocerebellar ataxia 13, 605259 (3), Autosomal dominant
KCND3	Potassium voltage-gated channel, Shal-related subfamily, member 3	605411	Brugada syndrome 9, 616399 (3), Autosomal dominant; Spinocerebellar ataxia 19, 607346 (3), Autosomal dominant
KCNE1	Potassium voltage-gated channel, Isk-related subfamily, member 1	176261	Long QT syndrome 5, 613695 (3), Autosomal dominant; Jervell and Lange-Nielsen syndrome 2, 612347 (3), Autosomal recessive
KCNE2	Potassium voltage-gated channel, Isk-related family, member 2	603796	Atrial fibrillation, familial, 4, 611493 (3); Long QT syndrome 6, 613693 (3), Autosomal dominant
KCNE3	Potassium voltage-gated channel, ISK-related subfamily, member 3	604433	?Brugada syndrome 6, 613119 (3)
KCNH1	Potassium voltage-gated channel, subfamily H, member 1 (ether-a-go-go, drosophila, homolog of)	603305	Temple-Baraitser syndrome, 611816 (3), Autosomal dominant; Zimmermann-Laband syndrome 1, 135500 (3), Autosomal dominant
KCNH2	Potassium voltage-gated channel, subfamily H, member 2 (human ether-a-go-go-related gene)	152427	{Long QT syndrome 2, acquired, susceptibility to}, 613688 (3), Autosomal dominant; Long QT syndrome 2, 613688 (3), Autosomal dominant; Short QT syndrome 1, 609620 (3)
KCNJ1	Potassium inwardly-rectifying channel, subfamily J, member 1	600359	Bartter syndrome, type 2, 241200 (3), Autosomal recessive
KCNJ10	Potassium inwardly-rectifying channel, subfamily J, member 10	602208	Enlarged vestibular aqueduct, digenic, 600791 (3), Autosomal recessive; SESAME syndrome, 612780 (3), Autosomal recessive
KCNJ11	Potassium inwardly-rectifying channel, subfamily J, member 11	600937	Maturity-onset diabetes of the young, type 13, 616329 (3), Autosomal dominant; {Diabetes mellitus, type 2, susceptibility to}, 125853 (3), Autosomal dominant; Diabetes, permanent neonatal, with or without neurologic features, 606176 (3), Autosomal recessive, Autosomal dominant; Diabetes mellitus, transient neonatal, 3, 610582 (3), Autosomal dominant; Hyperinsulinemic hypoglycemia, familial, 2, 60…
KCNJ13	Potassium inwardly-rectifying channel, subfamily J, member 13	603208	Leber congenital amaurosis 16, 614186 (3), Autosomal recessive; Snowflake vitreoretinal degeneration, 193230 (3), Autosomal dominant
KCNJ18	Potassium channel, inwardly rectifying, subfamily J, member 18	613236	{Thyrotoxic periodic paralysis, susceptibility to, 2}, 613239 (3), Autosomal dominant
KCNJ2	Potassium channel, inwardly rectifying, subfamily J, member 2	600681	Short QT syndrome 3, 609622 (3); Atrial fibrillation, familial, 9, 613980 (3), Autosomal dominant; Andersen syndrome, 170390 (3), Autosomal dominant
KCNJ5	Potassium inwardly-rectifying channel, subfamily J, member 5	600734	Long QT syndrome 13, 613485 (3), Autosomal dominant; Hyperaldosteronism, familial, type III, 613677 (3), Autosomal dominant
KCNJ6	Potassium inwardly-rectifying channel, subfamily J, member 6	600877	Keppen-Lubinsky syndrome, 614098 (3), Autosomal dominant
KCNK18	Potassium channel, subfamily K, member 18	613655	{Migraine, with or without aura, susceptibility to, 13}, 613656 (3)
KCNK3	Potassium channel, subfamily K, member 3	603220	Pulmonary hypertension, primary, 4, 615344 (3), Autosomal dominant
KCNK4	Potassium channel, subfamily K, member 4	605720	Facial dysmorphism, hypertrichosis, epilepsy, intellectual/developmental delay, and gingival overgrowth syndrome, 618381 (3), Autosomal dominant
KCNK9	Potassium channel, subfamily K, member 9	605874	Birk-Barel mental retardation dysmorphism syndrome, 612292 (3)
KCNMA1	Potassium large conductance calcium-activated channel, subfamily M, alpha member 1 (slowpoke, Drosophila, homolog of)	600150	{Epilepsy, idiopathic generalized, susceptibility to, 16}, 618596 (3), Autosomal dominant; Cerebellar atrophy, developmental delay, and seizures, 617643 (3), Autosomal recessive; Paroxysmal nonkinesigenic dyskinesia, 3, with or without generalized epilepsy, 609446 (3), Autosomal dominant
KCNMB1	Potassium large conductance calcium-activated channel, subfamily M, beta member 1	603951	{Hypertension, diastolic, resistance to}, 608622 (3), Autosomal dominant
KCNN3	Potassium channel, calcium-activated, intermediate/small conductance, subfamily N, member 3	602983	Zimmermann-Laband syndrome 3, 618658 (3), Autosomal dominant
KCNN4	Potassium intermediate/small conductance calcium-activated channel, subfamily N, member 4	602754	Dehydrated hereditary stomatocytosis 2, 616689 (3), Autosomal dominant
KCNQ1	Potassium voltage-gated channel, KQT-like subfamily, member 1	607542	Long QT syndrome 1, 192500 (3), Autosomal dominant; Jervell and Lange-Nielsen syndrome, 220400 (3), Autosomal recessive; Short QT syndrome 2, 609621 (3), Autosomal dominant; {Long QT syndrome 1, acquired, susceptibility to}, 192500 (3), Autosomal dominant; Atrial fibrillation, familial, 3, 607554 (3), Autosomal dominant
KCNQ1OT1	KCNQ1-overlapping transcript 1	604115	Beckwith-Wiedemann syndrome, 130650 (3), Autosomal dominant
KCNQ2	Potassium voltage-gated channel, KQT-like subfamily, member 2	602235	Epileptic encephalopathy, early infantile, 7, 613720 (3), Autosomal dominant; Seizures, benign neonatal, 1, 121200 (3), Autosomal dominant; Myokymia, 121200 (3), Autosomal dominant
KCNQ3	Potassium voltage-gated channel, KQT-like subfamily, member 3	602232	Seizures, benign neonatal, 2, 121201 (3), Autosomal dominant
KCNQ4	Potassium voltage-gated channel, KQT-like subfamily, member 4	603537	Deafness, autosomal dominant 2A, 600101 (3), Autosomal dominant
KCNQ5	Potassium channel, voltage-gated, KQT-like subfamily, member 5	607357	Mental retardation, autosomal dominant 46, 617601 (3), Autosomal dominant
KCNT1	Potassium channel, subfamily T, member 1	608167	Epilepsy, nocturnal frontal lobe, 5, 615005 (3), Autosomal dominant; Epileptic encephalopathy, early infantile, 14, 614959 (3), Autosomal dominant
KCNT2	Potassium channel, subfamily T, member 2	610044	?Epileptic encephalopathy, early infantile, 57, 617771 (3), Autosomal dominant
KCNV2	Potassium channel, voltage-gated, subfamily V, member 2	607604	Retinal cone dystrophy 3B, 610356 (3), Autosomal recessive
KCTD1	Potassium channel tetramerization domain-containing 1	613420	Scalp-ear-nipple syndrome, 181270 (3), Autosomal dominant
KCTD17	Potassium channel tetramerization domain-containing protein 17	616386	Dystonia 26, myoclonic, 616398 (3), Autosomal dominant
KCTD7	Potassium channel tetramerization domain containing 7	611725	Epilepsy, progressive myoclonic 3, with or without intracellular inclusions, 611726 (3), Autosomal recessive
KDF1	Keratinocyte differentiation factor 1	616758	?Ectodermal dysplasia 12, hypohidrotic/hair/tooth/nail type, 617337 (3), Autosomal dominant
KDM1A	Lysine-specific demethylase 1A	609132	Cleft palate, psychomotor retardation, and distinctive facial features, 616728 (3), Autosomal dominant
KDM5B	Lysine-specific demethylase 5B	605393	Mental retardation, autosomal recessive 65, 618109 (3), Autosomal recessive
[truncated: 2,252 more rows]

## Sheet: Supp Table 7
Supplementary Table 7. Distribution of variants identified in SABE 1171 cohorts with potential clinical relevance in OMIM Disease genes absent and present in database, per frequency
			Count per frequency bins of variants absent from population databases (% Singleton)
Type (total counts)	Category	Counts	≤ 0.001	≤ 0.01	≤ 0.05	≤ 0.1	> 0.1
SNV Substitution (25)	Any assertion on ClinVar	23	23 (96)	0	0	0	0
	Any pathogenic assertion on ClinVar*	2	2 (100)	0	0	0	0
	pLOF	25	2 (100)	0	0	0	0
	pLOF & Pathogenic assertion on ClinVar*	2	2 (100)	0	0	0	0
1bp-INDELs (293)	Any assertion on ClinVar	9	9 (100)	0	0	0	0
	Any pathogenic assertion on ClinVar*	8	8 (100)	0	0	0	0
	pLOF	292	289 (97)	3 (33)	0	0	0
	pLOF & Pathogenic assertion on ClinVar*	7	7 (100)	0	0	0	0
INDELs >1bp (229)	Any assertion on ClinVar	9	9 (100)	0	0	0	0
	Any pathogenic assertion on ClinVar*	9	9 (100)	0	0	0	0
	pLOF	229	214 (54)	9 (0)	0	1 (0)	3 (0)
	pLOF & Pathogenic assertion on ClinVar*	9	9 (100)	0	0	0	0
			Count per frequency bins of variants present in at least one population database (% Singleton)
Type (total counts)	Category	Counts	≤ 0.001	≤ 0.01	≤ 0.05	≤ 0.1	> 0.1
SNV Substitution (3151)	Any assertion on ClinVar	1646	1156 (77)	386 (0)	52 (0)	13 (0)	37 (0)
	Any pathogenic assertion on ClinVar**	953	796 (83)	142 (0)	6 (0)	2 (0)	5 (0)
	pLOF	2047	1614 (86)	289 (0)	59 (0)	13 (0)	71 (0)
	pLOF & Pathogenic assertion on ClinVar**	289	257 (85)	32 (0)	0	0	0
1bp-INDELs (627)	Any assertion on ClinVar	195	115 (74)	54 (0)	10 (0)	2 (0)	14 (0)
	Any pathogenic assertion on ClinVar**	87	72 (75)	15 (0)	0	0	0
	pLOF	619	373 (77)	144 (0)	53 (0)	10 (0)	40 (0)
	pLOF & Pathogenic assertion on ClinVar**	81	68 (75)	13 (0)	0	0	0
INDELs >1bp (817)	Any assertion on ClinVar	217	131 (71)	60 (0)	8 (0)	3 (0)	13 (0)
	Any pathogenic assertion on ClinVar**	92	83 (77)	8 (0)	1 (0)	0	0
	pLOF	788	421 (72)	242 (1)	62 (0)	15 (0)	41 (0)
	pLOF & Pathogenic assertion on ClinVar**	74	69 (78)	5 (0)	0	0	0
*Pathogenic, Likely pathogenic or Conflicting interpretations of pathogenicity with at least one P or LP assertion
**Pathogenic or Likely pathogenic. Excludes any variants asserted as Conflicting interpretations of pathogenicity

## Sheet: Supp Table 8
Supplementary Table 8. Pathogenic variants in OMIM Disease genes with frequencies above 10% in SABE dataset
Chr	Start	End	Ref	Alt	PredictedFunc.refGene	Gene.refGene	PredConsequence.refGene	HGMD	Clinvar_RS	Clinvar_PHE	Clinvar_SIG	gnomAD_genome_ALL	AC	AF	AN	CEGH_Filter	HomozygousALT_count	Hemizygous_count	HomozygousREF_count	Heterozygous_count	Allele_number	Allele_ALT_count	Frequencies
chr19	44908684	44908684	T	C	nonsynonymous SNV	APOE	APOE:NM_000041:exon4:c.T388C:p.C130R,APOE:NM_001302688:exon4:c.T466C:p.C156R,APOE:NM_001302689:exon4:c.T388C:p.C130R,APOE:NM_001302690:exon4:c.T388C:p.C130R,APOE:NM_001302691:exon4:c.T388C:p.C130R	CM900020	rs429358	Primary degenerative dementia of the Alzheimer type, presenile onset;Alzheimer's disease;Warfarin response;Alzheimer disease 2;not provided	Likely pathogenic, other, risk factor	0.1649	304	0.129804	2342	vSR	26	0	893	252	2342	304	0.124675
chrX	120626774	120626774	A	T	nonsynonymous SNV	C1GALT1C1	C1GALT1C1:NM_001011551:exon2:c.T393A:p.D131E,C1GALT1C1:NM_152692:exon3:c.T393A:p.D131E	.	rs17261572	Polyagglutinable erythrocyte syndrome	Pathogenic	0.1707	324	0.138343	2342	vSR	13	57	548	184	1916	267	0.13822
chr6	151627231	151627231	G	A	intergenic	CCDC170;ESR1	dist=6038;dist=63265	.	rs2046210	Estrogen resistance	Likely pathogenic	0.3921	919	0.3924	2342	vSR	194	0	446	531	2342	919	0.391938
chr11	48123823	48123823	A	C	nonsynonymous SNV	PTPRJ	PTPRJ:NM_001098503:exon5:c.A827C:p.Q276P,PTPRJ:NM_002843:exon5:c.A827C:p.Q276P	CM043071	rs1566734	Carcinoma of colon	Pathogenic	0.1398	418	0.17848	2342	vSR	37	0	790	344	2342	418	0.177378
chr5	1216785	1216785	G	A	splicing	SLC6A19	NM_001003841:exon8:c.1017-4G>A	CS086104	rs35329108	Hyperglycinuria;Iminoglycinuria, digenic	Pathogenic	0.2527	547	0.233561	2342	vSR	66	0	690	415	2342	547	0.231497

## Sheet: Supp Table 11
Supplementary Table 11. Pathogenic findings on ACMG-59 genes
Chr	Position	Ref	Alt	Gene	rsID	Transcript	Exon:Consequence	Predicted function	ClinVar main phenotypes	ClinVar assertion	Manual curation	Exomes	Genomes	Frequency	Heterozygotes	Clinically relevant phenotypes	Category after curation	Criteria used
1	38562470	C	T	SCN5A	rs977717858	NM_000335	Exon22:c.G3905A:p.R1302Q	Nonsynonymous SNV	Atrial fibrillation	Likely pathogenic	VUS	8.16e-06	NA	0.000427	1		Reclassified	PS4_sup + PM2 + PP3
10	43119548	G	A	RET	rs79658334	NM_020630	Exon14:c.G2410A:p.V804M	Nonsynonymous SNV	Pheochromocytoma, Medullary thyroid carcinoma and Multiple endocrine neoplasia	Pathogenic/Likely pathogenic	Pathogenic	0.0001	0.0002	0.000427	1	Female, 74. No history of cancer. Reports cirrhosis but no alcohol consumption.	Incomplete penetrance	PS4 + PS3_sup + PP1_strong
10	43120144	T	G	RET	rs75234356		Exon15:c.T2671G:p.S891A	Nonsynonymous SNV	Pheochromocytoma, Medullary thyroid carcinoma and Multiple endocrine neoplasia	Pathogenic	Pathogenic	1.22e-05	NA	0.000427	1	Male, 70. No cancer reported.	Incomplete penetrance	PS4, PP3, PM1, PP5_strong
11	2570682	G	A	KCNQ1	rs120074177	NM_000218	Exon3:c.G532A:p.A178T	Nonsynonymous SNV	Long QT syndrome	Pathogenic/Likely pathogenic	Pathogenic	8.18e-06	NA	0.000427	1	Female, 61, reported unspecified cardiovascular event, hypertension since 47, diabetes since 59, smoker, breast cancer at 59.	Incomplete penetrance/Subclinical/Mild phenotypes	Criteria in ClinVar report*
11	2572870	G	A	KCNQ1	rs120074193		Exon6:c.G805A:p.G269S	Nonsynonymous SNV	Long QT syndrome	Pathogenic	Pathogenic	4.07e-06	NA	0.000427	1	Male, 76, without history of cardiovascular disease except for hypertension diagnosed at 72.	Incomplete penetrance/Subclinical/Mild phenotypes	Criteria in ClinVar report*
11	47346207	C	T	MYBPC3	rs794727046	NM_000256	Exon12:c.1090G>A:p.A364T	Nonsynonymous SNV	Hypertrophic cardiomyopathy	Pathogenic	Likely pathogenic	NA	NA	0.000427	1	Male, 72, when reported diagnosis coronary artery disease at age 64.	Incomplete penetrance	PS4_mod + PM2 + PP1 + PP3
13	32316462	T	G	BRCA2	rs80358547	NM_000059	Exon2:c.T2G:p.M1R	Nonsynonymous SNV	Hereditary breast and ovarian cancer	Pathogenic	Pathogenic	8.13e-06	NA	0.000427	1		Incomplete penetrance	Criteria in ClinVar report*
13	32337161	AAAC	-	BRCA2	rs80359351		Exon11:c.2806_2809del:p.K936fs	Frameshift deletion	Hereditary breast and ovarian cancer	Pathogenic	Pathogenic	1.22e-05	NA	0.000427	1		Incomplete penetrance	Criteria in ClinVar report*
13	32339592	-	T	BRCA2	rs80359499		Exon11:c.5238dupT:p.S1746fs	Frameshift insertion	Hereditary breast and ovarian cancer	Pathogenic	Pathogenic	NA	NA	0.000427	1		Incomplete penetrance	Criteria in ClinVar report*
13	32370955	G	A	BRCA2	rs397507404		Exon20:c.8488-1G>A	Splicing	Hereditary breast and ovarian cancer	Pathogenic/Likely pathogenic	Pathogenic	NA	NA	0.000427	1		Incomplete penetrance	Criteria in ClinVar report*
19	11113307	C	T	LDLR	rs121908043	NM_000527	Exon9:c.C1216T:p.R406W	Nonsynonymous SNV	Familial hypercholesterolemia 1	Pathogenic/Likely pathogenic	Pathogenic	1.63e-05	3.24e-05	0.000427	1	Male, 67. Infarction at 34. BMI = 28. Hypertension since age 58. LDL = 147. Total cholesterol = 235.	Compatible finding	PM2, PP3, PS3, PP1_mod, PP5
19	38443612	C	T	RYR1	rs118192173	NM_000540	Exon4:c.C325T:p.R109W	Nonsynonymous SNV	Minicore myopathy and susceptibility to malignant hyperthermia	Pathogenic/Likely pathogenic	Pathogenic	7.31e-05	9.71e-05	0.000427	1		Recessive allele	PS3, PM2, PP3, PP5
19	38505339	AT	-	RYR1	rs758580075		Exon53:c.8341_8342del:p.I2781fs	Frameshift deletion	Minicore myopathy and susceptibility to malignant hyperthermia	Pathogenic	Pathogenic	8.18e-06	9.69e-05	0.000427	1		Recessive allele	PVS1 + PS4_sup + PM2 + PM3_sup
19	38512484	G	A	RYR1	rs776697656		Exon63:c.9472+1G>A	Splicing	Minicore myopathy and susceptibility to malignant hyperthermia	Likely pathogenic	Likely pathogenic	8.31e-06	NA	0.000427	1	Male, 74, no info on frailty in 2010. Last muscular info: at age 64, handgrip strength 28-42kg (cohort average).	Incomplete penetrance	PVS1_strong + PM2 + PS4_sup
19	38523116	G	A	RYR1	rs111436401		Exon68:c.10347+1G>A	Splicing	Minicore myopathy and susceptibility to malignant hyperthermia	Pathogenic/Likely pathogenic	Likely pathogenic	8.15e-06	NA	0.000427	1		Recessive allele	PVS1_strong + PS4_sup + PM2 + PM3
*Several laboratories have provided ACMG/AMP criteria agreed by the manual curators

## Sheet: Supp Table 12
Supplementary Table 12. Variant-based incidence of selected genes associated to recessively inherited disorders
				gnomAD v3	Allele frequencies per population (Bold = highest; red = absent)				Variant-based incidence atributable to homozygotes or compound heterozygotes
Gene (transcript)	Main clinical phenotype	Known pathogenic variants of recessive effect (rsID)	SABE het (1171)	All het counts (Genotypes)	SABE	Eur (non-Fin)	Afr	Lat	SABE	gnomAD v3 (Combined, fixed n= 71700 genotypes)	Annotation (CFTR2)
CFTR	Cystic fibrosis	Exon11:c.1520_1522del:p.507_508del (rs113993960)	10	1132 (71607)	0.00426985	0.0144	0.002617	0.003002	Combined = 21 heterozygotes among 1171 individuals. 1 carrier every 51 individuals = 1 couple of carriers in 2592. Incidence = 1 affected newborn in 10368	1 carrier every 50 individuals = 1 couple of carriers in 2510. Incidence = 1 affected newborn in 10040	Pathogenic
(NM_000492)		Exon6:c.C613T:p.P205S (rs121908803)	1	1 (71365)	0.000426985	1.553e-05	0	0			Pathogenic
		Exon24:c.C3909G:p.N1303K (rs80034486)	1	23 (71584)	0.000426985	0.0002634	2.38e-05	7.338e-05			Pathogenic
		Exon6:c.T617G:p.L206W (rs121908752)	4	18 (71630)	0.00170794	0.0002168	0	0.0002933			Pathogenic
		Exon4:c.C349T:p.R117C (rs77834169)	2	14 (71638)	0.000853971	0.0002013	2.379e-05	0			Pathogenic
		Exon4:c.G350A:p.R117H (rs78655421)	2	224 (71637)	0.000853971	0.002726	0.0006183	0.0004398			Depends on second allele
		Exon12:c.G1624T:p.G542X (rs113993959)	1	11 (71491)	0.000426985	0.0004336	2.378e-05	0.0005859			Pathogenic
		Exon13:c.1680-1G>A (rs121908794)	1	1 (71548)	0.000426985	0	2.379e-05	0			Pathogenic
		Exon22:c.C3484T:p.R1162X (rs74767530)	1	7 (71564)	0.000426985	7.749e-05	0	0			Pathogenic
											Annotation (CFTR2)
HBB	Hemoglobinopathies	Exon1:c.A20T:p.E7V (rs334)	33	1808 (71640)	0.0140905	0.0001703	0.04085	0.004905	Combined = 46 heterozygotes among 1171 individuals. 1 carrier every 25 individuals = 1 couple of carriers in 648. Incidence = 1 affected newborn in 2552	1 carrier every 29 individuals = 1 couple of carriers in 861. Incidence = 1 affected newborn in 3444	HbVar ID 785
(NM_000518)		Exon1:c.25_26del:p.K9fs (rs35497102)	1	2 (125543)*	0.000426985	0	0	0			HbVar ID 817
		Exon1/2:c.92+1G>A (rs33971440)	1	7 (71670)	0.000426985	8.807e-06	0	0			HbVar ID 227
		Exon1:c.G19A:p.E7K (rs33930165)	7	579 (71658)	0.0029889	1.549e-05	0.01351	0.0006588			HbVar ID 845
		Exon2:c.C118T:p.Q40X (rs11549407)	2	36 (71624)	0.000853971	0.0003717	4.76e-05	0.0005862			HbVar ID 827
		Exon1/2:c.93-21G>A (rs35004220)	2	13 (71607)	0.000853971	0.0001859	2.381e-05	0
											Annotation (Deafness variation DB)
GJB2	Deafness	Exon2:c.35delG:p.G12fs (rs80338939)	23	911 (71437)	0.00982067	0.00994	0.001386	0.005945	Combined = 31 heterozygotes among 1171 individuals. 1 carrier every 38 individuals = 1 couple of carriers in 1427. Incidence = 1 affected newborn in 5708	1 carrier every 69 individual = 1 couple of carriers in 4790. Incidence = 1 affected newborn in 19160	Pathogenic
(NM_004004)		Exon2:c.A617G:p.N206S (rs111033294)	4	24 (71648)	0.00170794	0.0001084	7.135e-05	0.0008783			Pathogenic
		Exon2:c.T269C:p.L90P (rs80338945)	2	92 (71631)	0.000853971	0.001177	9.519e-05	0.000586			Pathogenic
		Exon2:c.G139T:p.E47X (rs104894398)	1	18 (71641)	0.000426985	0.0001549	4.758e-05	0.000366			Pathogenic
		Exon1/2:c.-23+1G>A (rs80338940)	1	6 (15645)**	0.000426985	0.0003249	0	0			Pathogenic
											Annotation (Infevers)
MEFV									Mainly Recessive = 1 couple of carriers in 13712. Incidence = 1 affected newborn in 54848	Mainly Recessive = 1 couple of carriers in 88253 (across gnomAD). Incidence = 1 affected newborn in 353012. Latino population of gnomAD: 1 couple of carriers in 16583. Incidence = 1 affected newborn in 66332	VUS, but likely to be risk factor (low penetrance)
(NM_000243)	Familial mediterranean fever	Exon10:c.G2230T:p.A744S (rs61732874)***	10	241 (71595)	0.00426985	0.001611	0.0006668	0.003883
											Annotation (LOVD-HFE)
HFE									Mainly recessive 48 heterozygotes among 1171 individuals. 1 carrier every 23 individuals = 1 couple of carriers in 595. Incidence = 1 affected newborn in 2380	Mainly recessive 1 carrier every 14 individuals = 1 couple of carriers in 193. Incidence = 1 affected newborn in 772	Pathogenic
(NM_000410)	Hemochromatosis	Exon4:c.G845A:p.C282Y (rs1800562)***	48	5162 (71633)	0.0204953	0.06489	0.01133	0.0189
*gnomAD Exomes only
**gnomAD v2.1 only
***Reported both AD and AR

## Sheet: Supp Table 20
Supplementary Table 20. GWAS hits for cancer. We considered significant, associations with p-values < 10e-09 for whole genomes and with p-values < 5e-8 for array-filtered data.
Variant ID	Chr:Position (hg38)	Effect allele	Nearest gene: Consequence	EAF SABE1171	EAF Africans	EAF Europeans	SABE1171-WGS		SABE1171-Array
							Odds Ratio (L95-U95)	P-value	Odds Ratio (L95-U95)	P-value
rs73902781	21:36881365	T	HLCS:intronic	0.018	0.056	0.0038	30 (9.9-91)	1.8e-09 (F)	-	-
EAF: Effect allele frequency; EAF for Africans and Europeans from gnomAD.
*(A): hit using all individuals, (F): hit using females, (M): hit using males.

## Sheet: Supp Table 21
Supplementary Table 21. GWAS hits for BMI. We considered significant, associations with p-values < 10e-09 for whole genomes and with p-values < 5e-8 for array-filtered data. SNPs in red have r2 > 0.95 (0.95 < r2 < 0.99).
Variant ID	Chr:Position (hg38)	Effect allele	Nearest gene: Consequence	EAF SABE1171	EAF Africans	EAF Europeans	SABE1171-WGS		SABE1171-Array
							Regression Coefficient (L95-U95)	P-value	Regression Coefficient (L95-U95)	P-value
rs77326660	2:106346360	C	ILRUNP1/ANAPC1P6:intergenic	0.014	0.076	0.0002	5.5 (3.6-7.4)	8.4e-09 (A)	-	-
							7.7 (5.1-10.2)	7.2e-09 (F)	-	-
rs112879838	6:19582361	A	LOC105374958/LOC105374963:intergenic	0.0054	0.026	0.0002	9.3 (5.9-12.7)	5.3e-09 (A)	-	-
rs187130645	6:38222539	G	BTBD9:intronic	0.0054	0.014	0.0047	13.1 (8.8-17.5)	5.0e-09 (F)	-	-
rs35322794	6:100381956	T	LOC100129854/SIM1:intergenic	0.1232	0.097	0.127	2.6 (1.7-3.4)	7.8e-09 (M)	-	-
rs13209911	6:100368601	T	LOC100129854/SIM1:intergenic	0.1211	0.08	0.1266	-	-	2.5 (1.6-3.4)	2.0e-08 (M)
rs13201004	6:100388908	A	IM1:3 Prime UTR Variant	0.1214	0.095	0.1268	-	-	2.4 (1.6-3.3)	3.2e-08 (M)
rs10843058	12:28019612	A	PTHLH/LOC105369710:intergenic	0.0742	0.027	0.1046	2.5 (1.7-3.4)	6.3e-09 (A)	-	-
rs2619433	12:28013124	G	PTHLH/LOC105369710:intergenic	0.075	0.027	0.1044	-	-	2.4 (1.6-3.3)	2.0e-08 (A)
rs148632533	18:11308150	T	PIEZO2/LOC100130329:intergenic	0.0144	0.001	0.0004	8.7 (5.9-11.5)	1.3e-09 (M)	-	-
EAF: Effect allele frequency; EAF for Africans and Europeans from gnomAD.
*(A): hit using all individuals, (F): hit using females, (M): hit using males.

## Sheet: Supp Table 22
Supplementary Table 22. GWAS hits for LDL. We considered significant, associations with p-values < 10e-09 for whole genomes and with p-values < 5e-8 for array-filtered data. SNPs in red have r2 > 0.52 (0.52 < r2 < 0.95). SNPs in blue have r2 > 0.35 (0.35 < r2 < 0.64).
Variant ID	Chr:Position (hg38)	Effect allele	Nearest gene: Consequence	EAF SABE1171	EAF Africans	EAF Europeans	SABE1171-WGS		SABE1171-Array
							Regression Coefficient (L95-U95)	P-value	Regression Coefficient (L95-U95)	P-value
rs114557300	1:34295191	T	LOC105378639:Intronic	0.0099	0.051	0.0002	48.2 (33.7-62.7)	1.1e-10 (A)	-	-
rs112794427	1:34273959	T	C1orf94/LOC100420336: intergenic	0.009	0.049	0.0001	49.7 (34.5-65)	2.3e-10 (A)	-	-
rs2140686	1:34306903	A	LOC105378639/LOC105378640:intergenic	0.0117	0.055	0.0001	40.1 (27-53.1)	2.3e-09 (A)	40.1 (27-53.1)	2.3e-09 (A)
rs115111275	1:34289979	T	LOC105378639:intronic	0.0135	0.054	0.0097	38.6 (26-51.2)	2.3e-09 (A)	-	-
rs4653019	1:34299118	T	LOC105378639/LOC105378640:intergenic	0.0162	0.056	0.0097	33 (22-44.7)	9.9e-09 (A)	-	-
rs1589800	1:34305463	G	LOC105378639/LOC105378640:intergenic	0.0171	0.056	0.0097	-	-	31.9 (20.8-43)	2.1e-08 (A)
rs4131235	1:81444514	T	ADGRL2:intronic	0.0235	0.044	0.0127	-	-	27.7 (17.9-37.5)	3.5e-08 (A)
rs532144565	12:120346670	G	MSI1:intronic	0.0067	0	0.0014	64.7 (43.3-86.1)	4.4e-09 (F)	-	-
rs113548199	12:2136299	C	CACNA1C:intronic	0.019	0.075	0.0004	56.3 (38.5-74.1)	1.4e-09 (M)	-	-
			LOC107984131:intronic
rs74807647	12:2137484	T	CACNA1C:intronic	0.0104	0.04	0.0001	60 (40.6-79.4)	3.1e-09 (M)	-	-
			LOC107984131:intronic
rs112586389	12:2124147	C	CACNA1C:intronic	0.0144	0.065	0.0002	52.5 (35.2-69.7)	5.5e-09 (M)	-	-
rs115676766	16:74924982	T	WDR59:intronic	0.0076	0.077	0.0001	51 (34.6-67.3)	1.2e-09 (A)	-	-
EAF: Effect allele frequency; EAF for Africans and Europeans from gnomAD.
*(A): hit using all individuals, (F): hit using females, (M): hit using males.

## Sheet: Supp Table 23
Supplementary Table 23. GWAS hits for triglycerides. We considered significant, associations with p-values < 10e-09 for whole genomes and with p-values < 5e-8 for array-filtered data.
Variant ID	Chr:Position (hg38)	Effect allele	Nearest gene: Consequence	EAF SABE1171	EAF Africans	EAF Europeans	SABE1171-WGS		SABE1171-Array
							Regression Coefficient (L95-U95)	P-value	Regression Coefficient (L95-U95)	P-value
rs76305592	13:20967039	A	RPSAP54/LATS2:intergenic	0.0108	0.043	0.0002	0.33 (0.22-0.44)	1.9e-09 (F)	-	-
rs478470	20:4414505	C	ADRA1D/RPL7AP12:intergenic	0.0085	0.031	0	0.28 (0.18-0.38)	9.9e-09 (A)	-	-
							0.41 (0.28-0.55)	1.9e-09 (F)	-	-
EAF: Effect allele frequency; EAF for Africans and Europeans from gnomAD.
*(A): hit using all individuals, (F): hit using females, (M): hit using males.
